# Supplementary material for: The Effect of Non-Nutritive Sweetened Beverages on Postprandial Glycemic and Endocrine Responses: A Systematic Review and Network Meta-Analysis
Source: MDPI journal article supplement (doi:10.3390/nu15041050), 2023-02-20
Supplement: s1 [file s1]

## SUPPLEMENTARY TABLES

|                                                                                                                                                                                                                                                                                                                                                                                          |    |
|------------------------------------------------------------------------------------------------------------------------------------------------------------------------------------------------------------------------------------------------------------------------------------------------------------------------------------------------------------------------------------------|----|
| <b>Table S1.</b> Search strategy.....                                                                                                                                                                                                                                                                                                                                                    | 10 |
| <b>Table S2.</b> PICOTS framework .....                                                                                                                                                                                                                                                                                                                                                  | 11 |
| <b>Table S3.</b> Characteristics of UNCOUPLING INTERVENTIONS.....                                                                                                                                                                                                                                                                                                                        | 12 |
| <b>Table S4.</b> Characteristics of COUPLING INTERVENTIONS .....                                                                                                                                                                                                                                                                                                                         | 14 |
| <b>Table S5.</b> Characteristics of DELAYED COUPLING INTERVENTIONS .....                                                                                                                                                                                                                                                                                                                 | 15 |
| <b>Table S6.</b> OVERALL CIneMA assessments of UNCOUPLING INTERVENTIONS examining the effect of non-nutritive sweetened beverages (NNS beverages) sweetened with individual or blends of non-nutritive sweeteners (NNS), water, and sugar-sweetened beverages (SSBs) sweetened with caloric sweeteners on postprandial blood GLUCOSE response in HEALTHY participants.....               | 17 |
| <b>Table S7.</b> OVERALL CIneMA assessments of UNCOUPLING INTERVENTIONS examining the effect of non-nutritive sweetened beverages (NNS beverages) sweetened with individual or blends of non-nutritive sweeteners (NNS), water, and sugar-sweetened beverages (SSBs) sweetened with caloric sweeteners on postprandial blood GLUCOSE response in participants with TYPE 2 DIABETES ..... | 18 |
| <b>Table S8.</b> OVERALL CIneMA assessments of UNCOUPLING INTERVENTIONS examining the effect of non-nutritive sweetened beverages (NNS beverages) sweetened with individual or blends of non-nutritive sweeteners (NNS), water, and sugar-sweetened beverages (SSBs) sweetened with caloric sweeteners on postprandial blood INSULIN response in HEALTHY participants.....               | 19 |
| <b>Table S9.</b> OVERALL CIneMA assessments of UNCOUPLING INTERVENTIONS examining the effect of non-nutritive sweetened beverages (NNS beverages) sweetened with individual or blends of non-nutritive sweeteners (NNS), water, and sugar-sweetened beverages (SSBs) sweetened with caloric sweeteners on postprandial blood INSULIN response in participants with TYPE 2 DIABETES ..... | 20 |
| <b>Table S10.</b> GRADE assessments of UNCOUPLING INTERVENTIONS examining the effect of non-nutritive sweetened beverages (NNS beverages) sweetened with individual or blends of non-nutritive sweeteners (NNS), water, and sugar-sweetened beverages (SSBs) sweetened with caloric sweeteners on postprandial blood GLP-1 response in HEALTHY participants .....                        | 21 |
| <b>Table S11.</b> GRADE assessments of UNCOUPLING INTERVENTIONS examining the effect of non-nutritive sweetened beverages (NNS beverages) sweetened with individual or blends of non-nutritive sweeteners (NNS), water, and sugar-sweetened beverages (SSBs) sweetened with caloric sweeteners on postprandial blood GIP response in HEALTHY participants .....                          | 22 |
| <b>Table S12.</b> GRADE assessments of UNCOUPLING INTERVENTIONS examining the effect of non-nutritive sweetened beverages (NNS beverages) sweetened with individual or blends of non-nutritive sweeteners (NNS), water, and sugar-sweetened beverages (SSBs) sweetened with caloric sweeteners on postprandial blood GHRELIN response in HEALTHY participants.....                       | 23 |
| <b>Table S13.</b> GRADE assessments of UNCOUPLING INTERVENTIONS examining the effect of non-nutritive sweetened beverages (NNS beverages) sweetened with individual or blends of non-nutritive sweeteners (NNS), water, and sugar-sweetened beverages (SSBs) sweetened with caloric sweeteners on postprandial blood GLUCAGON response in HEALTHY participants .....                     | 24 |
| <b>Table S14.</b> GRADE assessments of UNCOUPLING INTERVENTIONS examining the effect of non-nutritive sweetened beverages (NNS beverages) sweetened with individual or blends of non-nutritive sweeteners (NNS), water, and sugar-sweetened beverages (SSBs) sweetened with                                                                                                              |    |



|                                                                                                                                                                                                                                                                                                                  |    |
|------------------------------------------------------------------------------------------------------------------------------------------------------------------------------------------------------------------------------------------------------------------------------------------------------------------|----|
| caloric sweeteners on postprandial blood GLUCAGON response in participants with TYPE 2 DIABETES .....                                                                                                                                                                                                            | 25 |
| <b>Table S15.</b> GRADE assessments of COUPLING INTERVENTIONS examining the effect of non-nutritive sweetened beverages (NNS beverages) sweetened with individual or blends of non-nutritive sweeteners (NNS) and controls on postprandial blood GLUCOSE response in HEALTHY participants .....                  | 26 |
| <b>Table S16.</b> GRADE assessments of COUPLING INTERVENTIONS examining the effect of non-nutritive sweetened beverages (NNS beverages) sweetened with individual or blends of non-nutritive sweeteners (NNS) and controls on postprandial blood INSULIN response in HEALTHY participants .....                  | 27 |
| <b>Table S17.</b> OVERALL CInEMA assessments of DELAYED COUPLING INTERVENTIONS examining the effect of non-nutritive sweetened beverages (NNS beverages) sweetened with individual or blends of non-nutritive sweeteners (NNS) and water on postprandial blood GLUCOSE response in HEALTHY participants.....     | 28 |
| <b>Table S18.</b> GRADE assessments of DELAYED COUPLING INTERVENTIONS examining the effect of non-nutritive sweetened beverages (NNS beverages) sweetened with individual or blends of non-nutritive sweeteners (NNS) and water on postprandial blood GLUCOSE response in participants with TYPE 2 DIABETES..... | 29 |
| <b>Table S19.</b> OVERALL CInEMA assessments of DELAYED COUPLING INTERVENTIONS examining the effect of non-nutritive sweetened beverages (NNS beverages) sweetened with individual or blends of non-nutritive sweeteners (NNS) and water on postprandial blood INSULIN response in HEALTHY participants .....    | 30 |
| <b>Table S20.</b> GRADE assessments of DELAYED COUPLING INTERVENTIONS examining the effect of non-nutritive sweetened beverages (NNS beverages) sweetened with individual or blends of non-nutritive sweeteners (NNS) and water on postprandial blood INSULIN response in participants with TYPE 2 DIABETES..... | 31 |
| <b>Table S21.</b> OVERALL CInEMA assessments of DELAYED COUPLING INTERVENTIONS examining the effect of non-nutritive sweetened beverages (NNS beverages) sweetened with individual or blends of non-nutritive sweeteners (NNS) and water on postprandial blood GLP-1 response in HEALTHY participants .....      | 32 |
| <b>Table S22.</b> GRADE assessments of DELAYED COUPLING INTERVENTIONS examining the effect of non-nutritive sweetened beverages (NNS beverages) sweetened with individual or blends of non-nutritive sweeteners (NNS) and water on postprandial blood GLP-1 response in participants with TYPE 2 DIABETES .....  | 33 |
| <b>Table S23.</b> OVERALL CInEMA assessments of DELAYED COUPLING INTERVENTIONS examining the effect of non-nutritive sweetened beverages (NNS beverages) sweetened with individual or blends of non-nutritive sweeteners (NNS) and water on postprandial blood GIP response in HEALTHY participants .....        | 34 |
| <b>Table S24.</b> GRADE assessments of DELAYED COUPLING INTERVENTIONS examining the effect of non-nutritive sweetened beverages (NNS beverages) sweetened with individual or blends of non-nutritive sweeteners (NNS) and water on postprandial blood GLUCAGON response in HEALTHY participants .....            | 35 |
| <b>Table S25.</b> GRADE assessments for outcomes with single direct trial comparisons.....                                                                                                                                                                                                                       | 36 |



## SUPPLEMENTARY FIGURES

|                                                                                                                                                                                                                                                                                                                                                                                              |    |
|----------------------------------------------------------------------------------------------------------------------------------------------------------------------------------------------------------------------------------------------------------------------------------------------------------------------------------------------------------------------------------------------|----|
| <b>Figure S1.</b> Formulas used to compute incremental area under the curve (iAUC) for primary and secondary outcomes .....                                                                                                                                                                                                                                                                  | 37 |
| <b>Figure S2.</b> Flow of literature .....                                                                                                                                                                                                                                                                                                                                                   | 38 |
| <b>Figure S3.</b> Individual (top) and summary (bottom) risk of bias assessments of studies with UNCOUPLING INTERVENTIONS .....                                                                                                                                                                                                                                                              | 39 |
| <b>Figure S4.</b> Individual (top) and summary (bottom) risk of bias assessment of studies with COUPLING INTERVENTIONS .....                                                                                                                                                                                                                                                                 | 40 |
| <b>Figure S5.</b> Individual (top) and summary (bottom) risk of bias assessment of studies with DELAYED COUPLING INTERVENTIONS .....                                                                                                                                                                                                                                                         | 41 |
| <b>Figure S6.</b> Risk of bias assessment of UNCOUPLING INTERVENTIONS examining non-nutritive sweetened beverages (NNS beverages) sweetened with individual or blends of non-nutritive sweeteners (NNS), water, and sugar-sweetened beverages (SSBs) sweetened with caloric sweeteners on postprandial blood GLUCOSE response in HEALTHY participants .....                                  | 42 |
| <b>Figure S7.</b> CINeMA output for the IMPRECISION domain of UNCOUPLING INTERVENTIONS examining non-nutritive sweetened beverages (NNS beverages) sweetened with individual or blends of non-nutritive sweeteners (NNS), water, and sugar-sweetened beverages (SSBs) sweetened with caloric sweeteners on postprandial blood GLUCOSE response in HEALTHY participants .....                 | 44 |
| <b>Figure S8.</b> CINeMA output for the HETEROGENEITY domain of UNCOUPLING INTERVENTIONS examining non-nutritive sweetened beverages (NNS beverages) sweetened with individual or blends of non-nutritive sweeteners (NNS), water, and sugar-sweetened beverages (SSBs) sweetened with caloric sweeteners on postprandial blood GLUCOSE response in HEALTHY participants .....               | 47 |
| <b>Figure S9.</b> CINeMA output for the INCOHERENCE domain of UNCOUPLING INTERVENTIONS examining non-nutritive sweetened beverages (NNS beverages) sweetened with individual or blends of non-nutritive sweeteners (NNS), water, and sugar-sweetened beverages (SSBs) sweetened with caloric sweeteners on postprandial blood GLUCOSE response in HEALTHY participants .....                 | 51 |
| <b>Figure S10.</b> Risk of bias assessment of UNCOUPLING INTERVENTIONS examining non-nutritive sweetened beverages (NNS beverages) sweetened with individual or blends of non-nutritive sweeteners (NNS), water, and sugar-sweetened beverages (SSBs) sweetened with caloric sweeteners on postprandial blood GLUCOSE response in participants with TYPE 2 DIABETES ..                       | 53 |
| <b>Figure S11.</b> CINeMA output for the IMPRECISION domain of UNCOUPLING INTERVENTIONS examining non-nutritive sweetened beverages (NNS beverages) sweetened with individual or blends of non-nutritive sweeteners (NNS), water, and sugar-sweetened beverages (SSBs) sweetened with caloric sweeteners on postprandial blood GLUCOSE response in participants with TYPE 2 DIABETES .....   | 54 |
| <b>Figure S12.</b> CINeMA output for the HETEROGENEITY domain of UNCOUPLING INTERVENTIONS examining non-nutritive sweetened beverages (NNS beverages) sweetened with individual or blends of non-nutritive sweeteners (NNS), water, and sugar-sweetened beverages (SSBs) sweetened with caloric sweeteners on postprandial blood GLUCOSE response in participants with TYPE 2 DIABETES ..... | 55 |



|                                                                                                                                                                                                                                                                                                                                                                                                  |    |
|--------------------------------------------------------------------------------------------------------------------------------------------------------------------------------------------------------------------------------------------------------------------------------------------------------------------------------------------------------------------------------------------------|----|
| <b>Figure S13.</b> CINeMA output for the INCOHERENCE domain of UNCOUPLING INTERVENTIONS examining non-nutritive sweetened beverages (NNS beverages) sweetened with individual or blends of non-nutritive sweeteners (NNS), water, and sugar-sweetened beverages (SSBs) sweetened with caloric sweeteners on postprandial blood GLUCOSE response in participants with TYPE 2 DIABETES .....       | 56 |
| <b>Figure S14.</b> Network plot and meta-analysis of UNCOUPLING INTERVENTIONS evaluating the effect of non-nutritive sweetened beverages (NNS beverages) sweetened single or blends of non-nutritive sweeteners (NNS), water, and sugar-sweetened beverages (SSBs) sweetened with caloric sweeteners on postprandial blood INSULIN response in HEALTHY participants.....                         | 57 |
| <b>Figure S15.</b> Risk of bias assessment of UNCOUPLING INTERVENTIONS evaluating the effect of non-nutritive sweetened beverages (NNS beverages) sweetened single or blends of non-nutritive sweeteners (NNS), water, and sugar-sweetened beverages (SSBs) sweetened with caloric sweeteners on postprandial blood INSULIN response in HEALTHY participants.....                                | 59 |
| <b>Figure S16.</b> CINeMA output for the IMPRECISION domain of UNCOUPLING INTERVENTIONS evaluating the effect of non-nutritive sweetened beverages (NNS beverages) sweetened single or blends of non-nutritive sweeteners (NNS), water, and sugar-sweetened beverages (SSBs) sweetened with caloric sweeteners on postprandial blood INSULIN response in HEALTHY participants .....              | 61 |
| <b>Figure S17.</b> CINeMA output for the HETEROGENEITY domain of UNCOUPLING INTERVENTIONS evaluating the effect of non-nutritive sweetened beverages (NNS beverages) sweetened single or blends of non-nutritive sweeteners (NNS), water, and sugar-sweetened beverages (SSBs) sweetened with caloric sweeteners on postprandial blood INSULIN response in HEALTHY participants .....            | 64 |
| <b>Figure S18.</b> CINeMA output for the INCOHERENCE domain of UNCOUPLING INTERVENTIONS evaluating the effect of non-nutritive sweetened beverages (NNS beverages) sweetened single or blends of non-nutritive sweeteners (NNS), water, and sugar-sweetened beverages (SSBs) sweetened with caloric sweeteners on postprandial blood INSULIN response in HEALTHY participants .....              | 67 |
| <b>Figure S19.</b> Network plot and meta-analysis of UNCOUPLING INTERVENTIONS evaluating the effect of non-nutritive sweetened beverages (NNS beverages) sweetened single or blends of non-nutritive sweeteners (NNS), water, and sugar-sweetened beverages (SSBs) sweetened with caloric sweeteners on postprandial blood INSULIN response in participants with TYPE 2 DIABETES.....            | 70 |
| <b>Figure S20.</b> Risk of bias assessment of UNCOUPLING INTERVENTIONS evaluating the effect of non-nutritive sweetened beverages (NNS beverages) sweetened single or blends of non-nutritive sweeteners (NNS), water, and sugar-sweetened beverages (SSBs) sweetened with caloric sweeteners on postprandial blood INSULIN response in participants with TYPE 2 DIABETES .....                  | 71 |
| <b>Figure S21.</b> CINeMA output for the IMPRECISION domain of UNCOUPLING INTERVENTIONS evaluating the effect of non-nutritive sweetened beverages (NNS beverages) sweetened single or blends of non-nutritive sweeteners (NNS), water, and sugar-sweetened beverages (SSBs) sweetened with caloric sweeteners on postprandial blood INSULIN response in participants with TYPE 2 DIABETES ..... | 72 |



|                                                                                                                                                                                                                                                                                                                                                                                                    |    |
|----------------------------------------------------------------------------------------------------------------------------------------------------------------------------------------------------------------------------------------------------------------------------------------------------------------------------------------------------------------------------------------------------|----|
| <b>Figure S22.</b> CINeMA output for the HETEROGENEITY domain of UNCOUPLING INTERVENTIONS evaluating the effect of non-nutritive sweetened beverages (NNS beverages) sweetened single or blends of non-nutritive sweeteners (NNS), water, and sugar-sweetened beverages (SSBs) sweetened with caloric sweeteners on postprandial blood INSULIN response in participants with TYPE 2 DIABETES ..... | 73 |
| <b>Figure S23.</b> CINeMA output for the INCOHERENCE domain of UNCOUPLING INTERVENTIONS evaluating the effect of non-nutritive sweetened beverages (NNS beverages) sweetened single or blends of non-nutritive sweeteners (NNS), water, and sugar-sweetened beverages (SSBs) sweetened with caloric sweeteners on postprandial blood INSULIN response in participants with TYPE 2 DIABETES .....   | 74 |
| <b>Figure S24.</b> Network plot and meta-analysis of UNCOUPLING INTERVENTIONS evaluating the effect of non-nutritive sweetened beverages (NNS beverages) sweetened single or blends of non-nutritive sweeteners (NNS), water, and sugar-sweetened beverages (SSBs) sweetened with caloric sweeteners on postprandial blood GLP-1 response in HEALTHY participants .....                            | 75 |
| <b>Figure S25.</b> Risk of bias assessment of UNCOUPLING INTERVENTIONS evaluating the effect of non-nutritive sweetened beverages (NNS beverages) sweetened single or blends of non-nutritive sweeteners (NNS), water, and sugar-sweetened beverages (SSBs) sweetened with caloric sweeteners on postprandial blood GLP-1 response in HEALTHY participants .....                                   | 76 |
| <b>Figure S26.</b> Network plot and meta-analysis of UNCOUPLING INTERVENTIONS evaluating the effect of non-nutritive sweetened beverages (NNS beverages) sweetened single or blends of non-nutritive sweeteners (NNS), water, and sugar-sweetened beverages (SSBs) sweetened with caloric sweeteners on postprandial blood GIP response in HEALTHY participants .....                              | 77 |
| <b>Figure S27.</b> Risk of bias assessment of UNCOUPLING INTERVENTIONS evaluating the effect of non-nutritive sweetened beverages (NNS beverages) sweetened single or blends of non-nutritive sweeteners (NNS), water, and sugar-sweetened beverages (SSBs) sweetened with caloric sweeteners on postprandial blood GIP response in HEALTHY participants .....                                     | 78 |
| <b>Figure S28.</b> Network plot and meta-analysis of UNCOUPLING INTERVENTIONS evaluating the effect of non-nutritive sweetened beverages (NNS beverages) sweetened single or blends of non-nutritive sweeteners (NNS), water, and sugar-sweetened beverages (SSBs) sweetened with caloric sweeteners on postprandial blood GHRELIN response in HEALTHY participants.....                           | 79 |
| <b>Figure S29.</b> Risk of bias assessment of UNCOUPLING INTERVENTIONS evaluating the effect of non-nutritive sweetened beverages (NNS beverages) sweetened single or blends of non-nutritive sweeteners (NNS), water, and sugar-sweetened beverages (SSBs) sweetened with caloric sweeteners on postprandial blood GHRELIN response in HEALTHY participants.....                                  | 80 |
| <b>Figure S30.</b> Network plot and meta-analysis of UNCOUPLING INTERVENTIONS evaluating the effect of non-nutritive sweetened beverages (NNS beverages) sweetened single or blends of non-nutritive sweeteners (NNS), water, and sugar-sweetened beverages (SSBs) sweetened with caloric sweeteners on postprandial blood GLUCAGON response in HEALTHY participants .....                         | 81 |
| <b>Figure S31.</b> Risk of bias assessment of UNCOUPLING INTERVENTIONS evaluating the effect of non-nutritive sweetened beverages (NNS beverages) sweetened single or blends of non-nutritive sweeteners (NNS), water, and sugar-sweetened beverages (SSBs) sweetened with caloric sweeteners on postprandial blood GLUCAGON response in HEALTHY participants .....                                | 82 |
| <b>Figure S32.</b> Network plot and meta-analysis of UNCOUPLING INTERVENTIONS evaluating the effect of non-nutritive sweetened beverages (NNS beverages) sweetened single or blends of                                                                                                                                                                                                             |    |



|                                                                                                                                                                                                                                                                                                                                                                                            |    |
|--------------------------------------------------------------------------------------------------------------------------------------------------------------------------------------------------------------------------------------------------------------------------------------------------------------------------------------------------------------------------------------------|----|
| non-nutritive sweeteners (NNS), water, and sugar-sweetened beverages (SSBs) sweetened with caloric sweeteners on postprandial blood GLUCAGON response in participants with TYPE 2 DIABETES .....                                                                                                                                                                                           | 83 |
| <b>Figure S33.</b> Risk of bias assessment of UNCOUPLING INTERVENTIONS evaluating the effect of non-nutritive sweetened beverages (NNS beverages) sweetened single or blends of non-nutritive sweeteners (NNS), water, and sugar-sweetened beverages (SSBs) sweetened with caloric sweeteners on postprandial blood GLUCAGON response in participants with TYPE 2 DIABETES .....           | 84 |
| <b>Figure S34.</b> Risk of bias assessment of COUPLING INTERVENTIONS evaluating the effect of non-nutritive sweetened beverages (NNS beverages) sweetened single or blends of non-nutritive sweeteners (NNS) and controls on postprandial blood GLUCOSE response in HEALTHY participants. ....                                                                                             | 85 |
| <b>Figure S35.</b> Network plot and meta-analysis of COUPLING INTERVENTIONS evaluating the effect of non-nutritive sweetened beverages (NNS beverages) sweetened single or blends of non-nutritive sweeteners (NNS) and controls on postprandial blood INSULIN response in HEALTHY participants. ....                                                                                      | 86 |
| <b>Figure S36.</b> Risk of bias assessment of COUPLING INTERVENTIONS evaluating the effect of non-nutritive sweetened beverages (NNS beverages) sweetened single or blends of non-nutritive sweeteners (NNS) and controls on postprandial blood INSULIN response in HEALTHY participants. ....                                                                                             | 87 |
| <b>Figure S37.</b> Risk of bias assessment of DELAYED COUPLING INTERVENTIONS evaluating the effect of non-nutritive sweetened beverages (NNS beverages) sweetened single or blends of non-nutritive sweeteners (NNS), water, and sugar-sweetened beverages (SSBs) sweetened with caloric sweeteners on postprandial blood GLUCOSE response in HEALTHY participants.....                    | 88 |
| <b>Figure S38.</b> CINeMA output for the IMPRECISION domain of DELAYED COUPLING INTERVENTIONS evaluating the effect of non-nutritive sweetened beverages (NNS beverages) sweetened single or blends of non-nutritive sweeteners (NNS), water, and sugar-sweetened beverages (SSBs) sweetened with caloric sweeteners on postprandial blood GLUCOSE response in HEALTHY participants.....   | 89 |
| <b>Figure S39.</b> CINeMA output for the HETEROGENEITY domain of DELAYED COUPLING INTERVENTIONS evaluating the effect of non-nutritive sweetened beverages (NNS beverages) sweetened single or blends of non-nutritive sweeteners (NNS), water, and sugar-sweetened beverages (SSBs) sweetened with caloric sweeteners on postprandial blood GLUCOSE response in HEALTHY participants..... | 91 |
| <b>Figure S40.</b> CINeMA output for the INCOHERENCE domain of DELAYED COUPLING INTERVENTIONS evaluating the effect of non-nutritive sweetened beverages (NNS beverages) sweetened single or blends of non-nutritive sweeteners (NNS), water, and sugar-sweetened beverages (SSBs) sweetened with caloric sweeteners on postprandial blood GLUCOSE response in HEALTHY participants.....   | 93 |
| <b>Figure S41.</b> Risk of bias assessment of DELAYED COUPLING INTERVENTIONS evaluating the effect of non-nutritive sweetened beverages (NNS beverages) sweetened single or blends of non-nutritive sweeteners (NNS), water, and sugar-sweetened beverages (SSBs) sweetened with caloric sweeteners on postprandial blood GLUCOSE response in participants with TYPE 2 DIABETES .....      | 94 |



|                                                                                                                                                                                                                                                                                                                                                                                             |     |
|---------------------------------------------------------------------------------------------------------------------------------------------------------------------------------------------------------------------------------------------------------------------------------------------------------------------------------------------------------------------------------------------|-----|
| <b>Figure S42.</b> Network plot and meta-analysis of DELAYED COUPLING INTERVENTIONS evaluating the effect of non-nutritive sweetened beverages (NNS beverages) sweetened single or blends of non-nutritive sweeteners (NNS), water, and sugar-sweetened beverages (SSBs) sweetened with caloric sweeteners on postprandial blood INSULIN response in HEALTHY participants.....              | 95  |
| <b>Figure S43.</b> Risk of bias assessment of DELAYED COUPLING INTERVENTIONS evaluating the effect of non-nutritive sweetened beverages (NNS beverages) sweetened single or blends of non-nutritive sweeteners (NNS), water, and sugar-sweetened beverages (SSBs) sweetened with caloric sweeteners on postprandial blood INSULIN response in HEALTHY participants.....                     | 97  |
| <b>Figure S44.</b> CINeMA output for the IMPRECISION domain of DELAYED COUPLING INTERVENTIONS evaluating the effect of non-nutritive sweetened beverages (NNS beverages) sweetened single or blends of non-nutritive sweeteners (NNS), water, and sugar-sweetened beverages (SSBs) sweetened with caloric sweeteners on postprandial blood INSULIN response in HEALTHY participants.....    | 98  |
| <b>Figure S45.</b> CINeMA output for the HETEROGENEITY domain of DELAYED COUPLING INTERVENTIONS evaluating the effect of non-nutritive sweetened beverages (NNS beverages) sweetened single or blends of non-nutritive sweeteners (NNS), water, and sugar-sweetened beverages (SSBs) sweetened with caloric sweeteners on postprandial blood INSULIN response in HEALTHY participants.....  | 100 |
| <b>Figure S46.</b> CINeMA output for the INCOHERENCE domain of DELAYED COUPLING INTERVENTIONS evaluating the effect of non-nutritive sweetened beverages (NNS beverages) sweetened single or blends of non-nutritive sweeteners (NNS), water, and sugar-sweetened beverages (SSBs) sweetened with caloric sweeteners on postprandial blood INSULIN response in HEALTHY participants.....    | 101 |
| <b>Figure S47.</b> Network plot and meta-analysis of DELAYED COUPLING INTERVENTIONS evaluating the effect of non-nutritive sweetened beverages (NNS beverages) sweetened single or blends of non-nutritive sweeteners (NNS), water, and sugar-sweetened beverages (SSBs) sweetened with caloric sweeteners on postprandial blood INSULIN response in participants with TYPE 2 DIABETES..... | 102 |
| <b>Figure S48.</b> Risk of bias assessment of DELAYED COUPLING INTERVENTIONS evaluating the effect of non-nutritive sweetened beverages (NNS beverages) sweetened single or blends of non-nutritive sweeteners (NNS), water, and sugar-sweetened beverages (SSBs) sweetened with caloric sweeteners on postprandial blood INSULIN response in participants with TYPE 2 DIABETES.....        | 103 |
| <b>Figure S49.</b> Network plot and meta-analysis of DELAYED COUPLING INTERVENTIONS evaluating the effect of non-nutritive sweetened beverages (NNS beverages) sweetened single or blends of non-nutritive sweeteners (NNS), water, and sugar-sweetened beverages (SSBs) sweetened with caloric sweeteners on postprandial blood GLP-1 response in HEALTHY participants .....               | 104 |
| <b>Figure S50.</b> Risk of bias assessment of DELAYED COUPLING INTERVENTIONS evaluating the effect of non-nutritive sweetened beverages (NNS beverages) sweetened single or blends of non-nutritive sweeteners (NNS), water, and sugar-sweetened beverages (SSBs) sweetened with caloric sweeteners on postprandial blood GLP-1 response in HEALTHY participants .....                      | 106 |
| <b>Figure S51.</b> CINeMA output for the IMPRECISION domain of DELAYED COUPLING INTERVENTIONS evaluating the effect of non-nutritive sweetened beverages (NNS beverages) sweetened single or blends of non-nutritive sweeteners (NNS), water, and sugar-sweetened                                                                                                                           |     |



|                                                                                                                                                                                                                                                                                                                                                                                            |     |
|--------------------------------------------------------------------------------------------------------------------------------------------------------------------------------------------------------------------------------------------------------------------------------------------------------------------------------------------------------------------------------------------|-----|
| beverages (SSBs) sweetened with caloric sweeteners on postprandial blood GLP-1 response in HEALTHY participants .....                                                                                                                                                                                                                                                                      | 107 |
| <b>Figure S52.</b> CINeMA output for the HETEROGENEITY domain of DELAYED COUPLING INTERVENTIONS evaluating the effect of non-nutritive sweetened beverages (NNS beverages) sweetened single or blends of non-nutritive sweeteners (NNS), water, and sugar-sweetened beverages (SSBs) sweetened with caloric sweeteners on postprandial blood GLP-1 response in HEALTHY participants .....  | 109 |
| <b>Figure S53.</b> CINeMA output for the INCOHERENCE domain of DELAYED COUPLING INTERVENTIONS evaluating the effect of non-nutritive sweetened beverages (NNS beverages) sweetened single or blends of non-nutritive sweeteners (NNS), water, and sugar-sweetened beverages (SSBs) sweetened with caloric sweeteners on postprandial blood GLP-1 response in HEALTHY participants .....    | 110 |
| <b>Figure S54.</b> Network plot and meta-analysis of DELAYED COUPLING INTERVENTIONS evaluating the effect of non-nutritive sweetened beverages (NNS beverages) sweetened single or blends of non-nutritive sweeteners (NNS), water, and sugar-sweetened beverages (SSBs) sweetened with caloric sweeteners on postprandial blood GLP-1 response in participants with TYPE 2 DIABETES ..... | 111 |
| <b>Figure S55.</b> Risk of bias assessment of DELAYED COUPLING INTERVENTIONS evaluating the effect of non-nutritive sweetened beverages (NNS beverages) sweetened single or blends of non-nutritive sweeteners (NNS), water, and sugar-sweetened beverages (SSBs) sweetened with caloric sweeteners on postprandial blood GLP-1 response in participants with TYPE 2 DIABETES .....        | 112 |
| <b>Figure S56.</b> Network plot and meta-analysis of DELAYED COUPLING INTERVENTIONS evaluating the effect of non-nutritive sweetened beverages (NNS beverages) sweetened single or blends of non-nutritive sweeteners (NNS), water, and sugar-sweetened beverages (SSBs) sweetened with caloric sweeteners on postprandial blood GIP response in HEALTHY participants .....                | 113 |
| <b>Figure S57.</b> Risk of bias assessment of DELAYED COUPLING INTERVENTIONS evaluating the effect of non-nutritive sweetened beverages (NNS beverages) sweetened single or blends of non-nutritive sweeteners (NNS), water, and sugar-sweetened beverages (SSBs) sweetened with caloric sweeteners on postprandial blood GIP response in HEALTHY participants .....                       | 114 |
| <b>Figure S58.</b> CINeMA output for the IMPRECISION domain of DELAYED COUPLING INTERVENTIONS evaluating the effect of non-nutritive sweetened beverages (NNS beverages) sweetened single or blends of non-nutritive sweeteners (NNS), water, and sugar-sweetened beverages (SSBs) sweetened with caloric sweeteners on postprandial blood GIP response in HEALTHY participants .....      | 115 |
| <b>Figure S59.</b> CINeMA output for the HETEROGENEITY domain of DELAYED COUPLING INTERVENTIONS evaluating the effect of non-nutritive sweetened beverages (NNS beverages) sweetened single or blends of non-nutritive sweeteners (NNS), water, and sugar-sweetened beverages (SSBs) sweetened with caloric sweeteners on postprandial blood GIP response in HEALTHY participants .....    | 116 |
| <b>Figure S60.</b> CINeMA output for the INCOHERENCE domain of DELAYED COUPLING INTERVENTIONS evaluating the effect of non-nutritive sweetened beverages (NNS beverages) sweetened single or blends of non-nutritive sweeteners (NNS), water, and sugar-sweetened                                                                                                                          |     |



|                                                                                                                                                                                                                                                                                                                                                                                  |     |
|----------------------------------------------------------------------------------------------------------------------------------------------------------------------------------------------------------------------------------------------------------------------------------------------------------------------------------------------------------------------------------|-----|
| beverages (SSBs) sweetened with caloric sweeteners on postprandial blood GIP response in HEALTHY participants .....                                                                                                                                                                                                                                                              | 117 |
| <b>Figure S61.</b> Network plot and meta-analysis of DELAYED COUPLING INTERVENTIONS evaluating the effect of non-nutritive sweetened beverages (NNS beverages) sweetened single or blends of non-nutritive sweeteners (NNS), water, and sugar-sweetened beverages (SSBs) sweetened with caloric sweeteners on postprandial blood GLUCAGON response in HEALTHY participants ..... | 118 |
| <b>Figure S62.</b> Risk of bias assessment of DELAYED COUPLING INTERVENTIONS evaluating the effect of non-nutritive sweetened beverages (NNS beverages) sweetened single or blends of non-nutritive sweeteners (NNS), water, and sugar-sweetened beverages (SSBs) sweetened with caloric sweeteners on postprandial blood GLUCAGON response in HEALTHY participants .....        | 119 |



**Table S1. Search strategy**

| MEDLINE                                                                                                                                                                                                                                                                                                                                                                                                                                                                                                                                                                                                                                                                                                                                                                                                                                                                                                                                                                                                                                                                                                                                                                                                                                                                                                                                                                                                                                                                                                                                                                                      | EMBASE                                                                                                                                                                                                                                                                                                                                                                                                                                                                                                                                                                                                                                                                                                                                                                                                                                                                                                                                                                                                                                                                                                                                                                                                                                                                                                                                                                                                                                                                                                                                                                                                                                                                                                              | Cochrane Central Register of Controlled Trials                                                                                                                                                                                                                                                                                                                                                                                                                                                                                                                                                                                                                                                                                                                                                                                                                                                                                                                                                                                                                                                                                                                                                                                                                                                                                                                                                                                                                        |
|----------------------------------------------------------------------------------------------------------------------------------------------------------------------------------------------------------------------------------------------------------------------------------------------------------------------------------------------------------------------------------------------------------------------------------------------------------------------------------------------------------------------------------------------------------------------------------------------------------------------------------------------------------------------------------------------------------------------------------------------------------------------------------------------------------------------------------------------------------------------------------------------------------------------------------------------------------------------------------------------------------------------------------------------------------------------------------------------------------------------------------------------------------------------------------------------------------------------------------------------------------------------------------------------------------------------------------------------------------------------------------------------------------------------------------------------------------------------------------------------------------------------------------------------------------------------------------------------|---------------------------------------------------------------------------------------------------------------------------------------------------------------------------------------------------------------------------------------------------------------------------------------------------------------------------------------------------------------------------------------------------------------------------------------------------------------------------------------------------------------------------------------------------------------------------------------------------------------------------------------------------------------------------------------------------------------------------------------------------------------------------------------------------------------------------------------------------------------------------------------------------------------------------------------------------------------------------------------------------------------------------------------------------------------------------------------------------------------------------------------------------------------------------------------------------------------------------------------------------------------------------------------------------------------------------------------------------------------------------------------------------------------------------------------------------------------------------------------------------------------------------------------------------------------------------------------------------------------------------------------------------------------------------------------------------------------------|-----------------------------------------------------------------------------------------------------------------------------------------------------------------------------------------------------------------------------------------------------------------------------------------------------------------------------------------------------------------------------------------------------------------------------------------------------------------------------------------------------------------------------------------------------------------------------------------------------------------------------------------------------------------------------------------------------------------------------------------------------------------------------------------------------------------------------------------------------------------------------------------------------------------------------------------------------------------------------------------------------------------------------------------------------------------------------------------------------------------------------------------------------------------------------------------------------------------------------------------------------------------------------------------------------------------------------------------------------------------------------------------------------------------------------------------------------------------------|
| <ol style="list-style-type: none"> <li>1. exp Non-Nutritive Sweeteners/</li> <li>2. exp Aspartame/</li> <li>3. aspartame.mp.</li> <li>4. exp Saccharin/</li> <li>5. saccharin.mp.</li> <li>6. sucralose.mp.</li> <li>7. acesulfame.mp.</li> <li>8. neotame.mp.</li> <li>9. advantame.mp.</li> <li>10. alitame.mp.</li> <li>11. exp Cyclamates/</li> <li>12. cyclamate.mp.</li> <li>13. exp Stevia/</li> <li>14. stevia.mp.</li> <li>15. steviol glycoside.mp.</li> <li>16. rebaudioside.mp.</li> <li>17. stevioside.mp.</li> <li>18. siraitia grosvenorii.mp.</li> <li>19. luo han guo.mp.</li> <li>20. monk fruit.mp.</li> <li>21. exp Postprandial Period/</li> <li>22. postprandial.mp.</li> <li>23. acute.mp.</li> <li>24. exp Blood Glucose/</li> <li>25. exp Glucose Tolerance Test/</li> <li>26. glucose.mp.</li> <li>27. glycemia.mp.</li> <li>28. glycaemia.mp.</li> <li>29. glycemie.mp.</li> <li>30. glycaemic.mp.</li> <li>31. exp Insulin/</li> <li>32. insulin.mp.</li> <li>33. exp Glucagon-Like Peptide 1/</li> <li>34. glucagon-like peptide 1.mp.</li> <li>35. glp-1.mp.</li> <li>36. exp Peptide YY/</li> <li>37. peptide yy.mp.</li> <li>38. PYY.mp.</li> <li>39. exp Gastric Inhibitory Polypeptide/</li> <li>40. gastric inhibitory polypeptide.mp.</li> <li>41. GIP.mp.</li> <li>42. exp Ghrelin/</li> <li>43. ghrelin.mp.</li> <li>44. exp Leptin/</li> <li>45. leptin.mp.</li> <li>46. exp Glucagon/</li> <li>47. glucagon.mp.</li> <li>48. or/1-20</li> <li>49. or/21-47</li> <li>50. 48 and 49</li> <li>51. limit 50 to animals</li> <li>52. 50 not 51</li> </ol> | <ol style="list-style-type: none"> <li>1. exp nonnutritive sweetener/</li> <li>2. exp aspartame/</li> <li>3. aspartame.mp.</li> <li>4. exp saccharin/</li> <li>5. saccharin.mp.</li> <li>6. exp sucralose/</li> <li>7. sucralose.mp.</li> <li>8. exp acesulfame/</li> <li>9. acesulfame.mp.</li> <li>10. exp neotame/</li> <li>11. neotame.mp.</li> <li>12. advantame.mp.</li> <li>13. exp alitame/</li> <li>14. alitame.mp.</li> <li>15. exp cyclamate sodium/</li> <li>16. cyclamate.mp.</li> <li>17. exp Stevia/</li> <li>18. stevia.mp.</li> <li>19. steviol glycoside.mp.</li> <li>20. rebaudioside.mp.</li> <li>21. stevioside.mp.</li> <li>22. exp Siraitia grosvenorii/</li> <li>23. luo han guo.mp.</li> <li>24. monk fruit.mp.</li> <li>25. exp postprandial state/</li> <li>26. postprandial.mp.</li> <li>27. acute.mp.</li> <li>28. exp glucose blood level/</li> <li>29. exp glucose tolerance test/</li> <li>30. glucose.mp.</li> <li>31. glycemia.mp.</li> <li>32. glycaemia.mp.</li> <li>33. glycemie.mp.</li> <li>34. glycaemic.mp.</li> <li>35. exp insulin/</li> <li>36. insulin.mp.</li> <li>37. exp glucagon like peptide 1/</li> <li>38. glucagon-like peptide 1.mp.</li> <li>39. glp-1.mp.</li> <li>40. exp peptide YY/</li> <li>41. peptide yy.mp.</li> <li>42. PYY.mp.</li> <li>43. exp gastric inhibitory polypeptide/</li> <li>44. gastric inhibitory polypeptide.mp.</li> <li>45. GIP.mp.</li> <li>46. exp ghrelin/</li> <li>47. ghrelin.mp.</li> <li>48. exp leptin/</li> <li>49. leptin.mp.</li> <li>50. exp glucagon/</li> <li>51. glucagon.mp.</li> <li>52. or/1-24</li> <li>53. or/25-51</li> <li>54. 52 and 53</li> <li>55. limit 54 to animals</li> <li>56. 54 not 55</li> </ol> | <ol style="list-style-type: none"> <li>1. exp Non-Nutritive Sweeteners/</li> <li>2. exp Aspartame/</li> <li>3. aspartame.mp.</li> <li>4. exp Saccharin/</li> <li>5. saccharin.mp.</li> <li>6. sucralose.mp.</li> <li>7. acesulfame.mp.</li> <li>8. neotame.mp.</li> <li>9. advantame.mp.</li> <li>10. exp Cyclamates/</li> <li>11. cyclamate.mp.</li> <li>12. exp Stevia/</li> <li>13. stevia.mp.</li> <li>14. steviol glycoside.mp.</li> <li>15. rebaudioside.mp.</li> <li>16. stevioside.mp.</li> <li>17. luo han guo.mp.</li> <li>18. monk fruit.mp.</li> <li>19. exp Postprandial Period/</li> <li>20. postprandial.mp.</li> <li>21. acute.mp.</li> <li>22. exp Blood Glucose/</li> <li>23. exp Glucose Tolerance Test/</li> <li>24. glucose.mp.</li> <li>25. glycemia.mp.</li> <li>26. glycaemia.mp.</li> <li>27. glycemie.mp.</li> <li>28. glycaemic.mp.</li> <li>29. exp Insulin/</li> <li>30. insulin.mp.</li> <li>31. exp Glucagon-Like Peptide 1/</li> <li>32. glucagon-like peptide 1.mp.</li> <li>33. GLP-1.mp.</li> <li>34. exp Peptide YY/</li> <li>35. peptide yy.mp.</li> <li>36. PYY.mp.</li> <li>37. exp Gastric Inhibitory Polypeptide/</li> <li>38. gastric inhibitory polypeptide.mp.</li> <li>39. GIP.mp.</li> <li>40. exp Ghrelin/</li> <li>41. ghrelin.mp.</li> <li>42. exp Leptin/</li> <li>43. leptin.mp.</li> <li>44. exp Glucagon/</li> <li>45. glucagon.mp.</li> <li>46. or/1-18</li> <li>47. or/19-45</li> <li>48. 46 and 47</li> </ol> |



**Table S2. PICOTS framework**

| Participants                                                                                                                | Intervention                                                                                     | Comparison                                                                                       | Outcomes                                                                                            | Time    | Study Design                                                     |
|-----------------------------------------------------------------------------------------------------------------------------|--------------------------------------------------------------------------------------------------|--------------------------------------------------------------------------------------------------|-----------------------------------------------------------------------------------------------------|---------|------------------------------------------------------------------|
| Males and females of all health backgrounds and ages (i.e., adults and children), excluding pregnant or breastfeeding women | NNS beverages sweetened single or blends of NNS, water, or SSBs<br>sweetened with caloric sugars | NNS beverages sweetened single or blends of NNS, water, or SSBs<br>sweetened with caloric sugars | Glucose iAUC<br>Insulin iAUC<br>GLP-1 iAUC<br>PYY iAUC<br>GIP iAUC<br>Ghrelin iAUC<br>Glucagon iAUC | 2 hours | Acute, randomized and non-randomized, controlled, feeding trials |

NNS beverage, non-nutritive sweetened beverage; NNS, non-nutritive sweetener; SSBs, sugar-sweetened beverage; iAUC, incremental area under the curve; GLP-1, glucagon-like peptide 1; PYY, peptide YY; GIP, gastric inhibitory peptide. NNS include, aspartame, acesulfame potassium (Ace-K), Luo Han Guo (monk) fruit extract, neotame, saccharin, stevia, sucralose and advantame (1)



**Table S3. Characteristics of UNCOUPLING INTERVENTIONS**

| First author, year (reference)                                                              | Arm description                                                                                                                                                              | Study Design | Participants                   | Health status                | Age, years                                                   | BMI, kg/m <sup>2</sup>   | Duration (mins) | Outcomes extracted                 | Funding source | Country  |
|---------------------------------------------------------------------------------------------|------------------------------------------------------------------------------------------------------------------------------------------------------------------------------|--------------|--------------------------------|------------------------------|--------------------------------------------------------------|--------------------------|-----------------|------------------------------------|----------------|----------|
| <b>Shigeta, 1985 (2)</b><br>Aspartame<br>Glucose                                            | 225mg oral aspartame loading test<br>75g OGTT                                                                                                                                | NRS          | 15 (10M, 5F)                   | DM2                          | 62.9 (12.8)                                                  | -                        | 180             | Glucose<br>Insulin                 | -              | Japan    |
| <b>Okuno, 1986 (3)</b><br>Aspartame<br>Glucose                                              | 500mg aspartame in 300ml water<br>100g glucose in 300ml water                                                                                                                | NRS          | 7<br>6<br>8<br>8               | Healthy<br>DM2<br>DM2<br>DM2 | 46.7 (31-60)<br>47.3 (18-64)<br>50.3 (38-60)<br>46.5 (46-54) | -                        | 180             | Glucose<br>Insulin<br>Glucagon     | -              | Japan    |
| <b>Horwitz, 1988 (4)</b><br>Aspartame<br>Saccharin<br>Water                                 | 300ml Kool-Aid sweetened with 400mg aspartame<br>300ml Kool-Aid sweetened with 135mg saccharin<br>300ml unsweetened Kool-Aid                                                 | RCT          | 12 (0M, 12F)<br>10 (5M, 5F)    | Healthy<br>DM2               | 28.0 (8.0)<br>57.0 (8.0)                                     | 22.5<br>33.7             | 180             | Glucose<br>Insulin<br>Glucagon     | Industry       | USA      |
| <b>Moller, 1991 (5)</b><br>Aspartame<br>Water                                               | 1g aspartame dissolved in 200ml water<br>200ml water                                                                                                                         | RCT          | 6 (6M, 0F)                     | Healthy                      | 29 (22-37)                                                   | -                        | 240             | Glucose<br>Insulin                 | Agency         | Denmark  |
| <b>Härtel, 1993 (6)</b><br>Aspartame<br>Ace-K<br>Cyclamate<br>Saccharin<br>Sucrose<br>Water | 165mg aspartame in 330ml water<br>165mg ace-K in 330ml water<br>800mg cyclamate in 330ml water<br>75mg saccharin in 330ml water<br>33g sucrose in 330ml water<br>330ml water | NRS          | 14 (6M, 8F)                    | Healthy                      | 19-52                                                        | -                        | 120             | Glucose<br>Insulin                 | -              | Germany  |
| <b>Nguyen, 1998 (7)</b><br>Aspartame<br>Glucose                                             | 250mg aspartame dissolved in 250ml water<br>75g glucose dissolved in 250ml water                                                                                             | RCT          | 7 (4M, 3F)                     | Healthy                      | 30-47                                                        | -                        | 120             | Glucose<br>Insulin                 | -              | USA      |
| <b>Coppola, 2004 (8)</b><br>Aspartame<br>Glucose                                            | 250mg aspartame dissolved in 250ml water<br>75g glucose dissolved in 250ml water                                                                                             | RCT          | 20 (10M, 10F)<br>20 (10M, 10F) | Healthy<br>IGT               | 68.0 (8.0)<br>69.0 (11.0)                                    | 26.4 (3.0)<br>27.0 (3.6) | 120             | Glucose<br>Insulin                 | -              | Italy    |
| <b>Berlin, 2005 (9)</b><br>Aspartame<br>Glucose                                             | 0.6g aspartame in 200ml water<br>75g glucose in 200ml water                                                                                                                  | RCT          | 12 (7M, 5F)                    | Healthy                      | 28.6 (7.9)                                                   | 21.2 (0.4)               | 300             | Glucose<br>Insulin                 | Agency         | France   |
| <b>Ford, 2011 (10)</b><br>Sucralose<br>Water                                                | 50ml sucralose (0.083% w/v, 2mmol/L)<br>50ml water                                                                                                                           | RCT          | 8 (1M, 7F)                     | Healthy                      | 22-27                                                        | 18.8-23.9                | 120             | Glucose<br>Insulin<br>GLP-1<br>PYY | Agency         | UK       |
| <b>Maersk, 2012 (11)</b><br>Aspartame<br>Sucrose<br>Water                                   | 500ml aspartame-sweetened diet cola (Coca Cola)<br>500ml sucrose-sweetened regular cola (Coca Cola)<br>500ml bottled still water (Aqua d'or mineral water)                   | RCT          | 24 (12M, 12F)                  | Healthy                      | 33.5 (9.2)                                                   | 31.4 (3.1)               | 240             | Ghrelin<br>GLP-1<br>GIP            | Agency         | Denmark  |
| <b>Hazali, 2014 (12)</b><br>Stevia (500mg)<br>Stevia (1000mg)<br>Sucrose                    | 500mg stevia in 100ml water<br>1000mg stevia in 100ml water<br>20g sucrose in 100ml water                                                                                    | NRS          | 32 (4M, 28F)                   | Healthy                      | 21.3 (1.1)                                                   | 21.6 (3.3)               | 120             | Glucose                            | Agency         | Malaysia |
| <b>Bloomer, 2016 (13)</b><br>Aspartame<br>Sucralose<br>Sucrose<br>Water                     | 20oz aspartame sweetened soda (Sunkist)<br>20oz splenda/sucralose sweetened soda (Diet Rite)<br>20oz HFCS and sugar sweetened soda (Sunkist)<br>20oz carbonated water        | RCT          | 12 (12M, 0F)                   | Healthy                      | 26.8 (7.6)                                                   | 27.1 (2.8)               | 120             | Glucose<br>Insulin                 | Agency         | USA      |



|                            |                                                            |     |              |         |            |            |     |                    |        |         |
|----------------------------|------------------------------------------------------------|-----|--------------|---------|------------|------------|-----|--------------------|--------|---------|
| <b>Gonzalez, 2017 (14)</b> |                                                            | RCT | 10 (10M, 0F) | Healthy | 22-26      | 20-24      | 120 | Glucose<br>Insulin | -      | Spain   |
| Ace-K+Asp+Cycl             | 330ml of Coke Zero with caffeine but without sugar         |     |              |         |            |            |     |                    |        |         |
| Ace-K+Asp+Cycl             | 330ml of caffeine-free Coke Zero without sugar             |     |              |         |            |            |     |                    |        |         |
| Sucrose                    | 330ml of Regular Coke with sugar and caffeine              |     |              |         |            |            |     |                    |        |         |
| Sucrose                    | 330ml of Regular Coke with sugar but without caffeine      |     |              |         |            |            |     |                    |        |         |
| <b>Goza, 2018 (15)</b>     |                                                            | RCT | 10 (5M, 5F)  | Healthy | 27.4 (3.5) | 23.5 (2.6) | 120 | Glucose<br>Insulin | Agency | Chile   |
| Ace-K+Aspartame            | 350ml beverage with 84mg aspartame and 56mg<br>Ace-K       |     |              |         |            |            |     |                    |        |         |
| Sucrose                    | 350ml beverage with 38.7g sucrose                          |     |              |         |            |            |     |                    |        |         |
| <b>Eckstein 2021 (16)</b>  |                                                            | RCT | 15 (10M, 5F) | Healthy | 25.4 (2.5) | 23.7 (1.7) | 120 | Glucose<br>Insulin | -      | Germany |
| Sucralose                  | 300mL water with 0.2g sucralose                            |     |              |         |            |            |     |                    |        |         |
| Glucose                    | 300mL water with 1g/kg BM glucose                          |     |              |         |            |            |     |                    |        |         |
| Fructose                   | 300mL water with 1g/kg BM fructose                         |     |              |         |            |            |     |                    |        |         |
| Sucrose                    | 300mL water with 0.5g/kg BM glucose and fructose<br>(each) |     |              |         |            |            |     |                    |        |         |

Ace-K, acesulfame potassium; Asp, aspartame; Cycl, cyclamate; RCT, randomized controlled trial; NRS, non-randomized study; OGTT, oral glucose tolerance test; iAUC, incremental area under the curve; M, male; F, female; DM2, type 2 diabetes; N, normal; IGT, impaired glucose tolerance; HFCS, high-fructose corn syrup; BM, body mass



**Table S4. Characteristics of COUPLING INTERVENTIONS**

| First author, year (reference) | Meal description                                                                                                      | Study Design | Participants | Health status | Age, years   | BMI, kg/m2       | Duration (mins) | Outcomes extracted | Funding source | Country |
|--------------------------------|-----------------------------------------------------------------------------------------------------------------------|--------------|--------------|---------------|--------------|------------------|-----------------|--------------------|----------------|---------|
| <b>Wolf-Novak, 1988 (17)</b>   |                                                                                                                       | NRS          | 7 (2M, 5F)   | Healthy       | 27.0 (3.0)   | -                | 360             | Glucose<br>Insulin | Agency         | USA     |
| Aspartame                      | 12oz cherry-flavored beverage sweetened with 200mg aspartame and 60g CHO (partial hydrolysate of starch)              |              |              |               |              |                  |                 |                    |                |         |
| Control                        | 12oz cherry-flavored beverage with 60g CHO (partial hydrolysate of starch)                                            |              |              |               |              |                  |                 |                    |                |         |
| <b>Melchoir, 1991 (18)</b>     |                                                                                                                       | RCT          | 10 (3M, 7F)  | Healthy       | 21.7 (20-25) | 20.6 (18.9-23.5) | 180             | Glucose<br>Insulin | Agency         | France  |
| Aspartame                      | 400ml chocolate drink sweetened with 80mg aspartame                                                                   |              |              |               |              |                  |                 |                    |                |         |
| Control                        | 400ml chocolate drink sweetened with 50g sucrose                                                                      |              |              |               |              |                  |                 |                    |                |         |
| <b>Solomi, 2019 (19)</b>       |                                                                                                                       | NRS          | 10 (4M, 6F)  | Healthy       | 27.2 (6.9)   | 23.9 (2.4)       | 120             | Glucose            | Agency         | UK      |
| Ace-K+Aspartame                | 25g glucose in 125ml water consumed with 236ml diet cola sweetened with aspartame and ace-K (Caffeine-Free Diet Coke) |              |              |               |              |                  |                 |                    |                |         |
| Control                        | 25g glucose in 125ml water consumed with 236ml water                                                                  |              |              |               |              |                  |                 |                    |                |         |

RCT, randomized controlled trial; NRS, non-randomized study; OGTT, oral glucose tolerance test; iAUC, incremental area under the curve; M, male; F, female; DM2, type 2 diabetes; N, normal; IGT, impaired glucose tolerance; HFCS, high-fructose corn syrup; CHO, carbohydrate; IDDM, insulin-dependent diabetes mellitus; NIDDM, non-insulin dependent diabetes mellitus



**Table S5. Characteristics of DELAYED COUPLING INTERVENTIONS**

| First author, year (reference)  | Meal description                                                                                                                         | Study Design | Participants  | Health status | Age, years  | BMI, kg/m <sup>2</sup> | Duration (mins) | Outcomes extracted              | Funding source | Country |
|---------------------------------|------------------------------------------------------------------------------------------------------------------------------------------|--------------|---------------|---------------|-------------|------------------------|-----------------|---------------------------------|----------------|---------|
| <b>Brown, 2012 (20)</b>         |                                                                                                                                          | RCT          | 25 (13M, 12F) | Healthy       | 18.8 (4.4)  | 25.7 (4.6)             | 180             | Glucose                         | Agency         | USA     |
| Diet Soda                       | 240ml of diet soda (Diet Rite Cola containing sucralose and ace-K) consumed 10mins prior to 75g OGTT                                     |              | 9 (3M, 6F)    | DM1           | 18.2 (3.4)  | 21.7 (2.4)             |                 | Insulin                         |                |         |
| Carbonated water                | 240ml of carbonated water (Zazz Seltzer) consumed 10mins prior to 75g OGTT                                                               |              | 10 (1M, 9F)   | DM2           | 17.9 (3.13) | 35.0 (6.8)             |                 | Glucagon<br>GLP-1<br>GIP<br>PYY |                |         |
| <b>Pepino, 2013 (21)</b>        |                                                                                                                                          | RCT          | 17 (2M, 15F)  | Healthy       | 35.1 (4.1)  | 41.0 (6.2)             | 300             | Glucose                         | Agency         | USA     |
| Sucralose                       | 60ml solution containing 48mg sucralose was consumed 10mins before ingestion of 75g glucose solution                                     |              |               |               |             |                        |                 | Insulin                         |                |         |
| Water                           | 60ml of distilled water was consumed 10mins prior to ingestion of 75g glucose solution                                                   |              |               |               |             |                        |                 | GLP-1<br>GIP                    |                |         |
| <b>Temizkhan, 2014 (22)</b>     |                                                                                                                                          | RCT          | 8 (4M, 4F)    | Healthy       | 45.0 (4.1)  | 30.3 (4.5)             | 120             | Glucose                         | -              | Turkey  |
| Aspartame                       | 72mg aspartame in 200ml water was consumed 15mins prior to 75g OGTT                                                                      |              | 8 (4M, 4F)    | DM2           | 51.5 (9.2)  | 33.7 (5.4)             |                 | Insulin                         |                |         |
| Sucralose                       | 24mg sucralose in 200ml water was consumed 15mins prior to 75g OGTT                                                                      |              |               |               |             |                        |                 | GLP-1                           |                |         |
| Water                           | 200ml water was consumed 15mins prior to 75g OGTT                                                                                        |              |               |               |             |                        |                 |                                 |                |         |
| <b>Sylvetsky, 2016 (23)</b>     |                                                                                                                                          | RCT          | 30 (14M, 16F) | Healthy       | 29.7 (7.6)  | 25.8 (4.2)             | 120             | Glucose                         | Agency         | USA     |
| Sucralose (68mg)                | A drink containing 68mg sucralose mixed with 355ml water was consumed 10mins prior to 75g OGTT                                           |              |               |               |             |                        |                 | Insulin                         |                |         |
| Sucralose (170mg)               | A drink containing 170mg sucralose mixed with 355ml water was consumed 10mins prior to 75g OGTT                                          |              |               |               |             |                        |                 | Glucagon                        |                |         |
| Arm 1 Sucralose (250mg)         | A drink containing 250mg sucralose mixed with 355ml water was consumed 10mins prior to 75g OGTT                                          |              |               |               |             |                        |                 | GLP-1                           |                |         |
| Water                           | A drink containing 355ml water was consumed 10mins prior to 75g OGTT                                                                     |              |               |               |             |                        |                 | GIP<br>PYY                      |                |         |
| Diet Rite Cola                  | 355ml caffeine-free Diet Rite Cola sweetened with 68mg sucralose and 41mg ace-K was consumed 10mins prior to 75g OGTT                    | RCT          | 31 (14M, 17F) | Healthy       | 27.4 (6.7)  | 26.3 (7.5)             | 120             | Glucose                         | Agency         | USA     |
| Arm 2 Diet Mountain Dew         | 355ml caffeine-free Diet Mountain Dew sweetened with 18mg sucralose, 18mg ace-K and 57mg aspartame was consumed 10mins prior to 75g OGTT |              |               |               |             |                        |                 | Insulin                         |                |         |
| NNS solution                    | A drink containing 68mg sucralose and 41mg ace-K in 355ml water was consumed 10mins prior to 75g OGTT                                    |              |               |               |             |                        |                 | GLP-1                           |                |         |
| Water                           | 355ml water was consumed 10mins prior to 75g OGTT                                                                                        |              |               |               |             |                        |                 | GIP<br>PYY                      |                |         |
| <b>Kariman Azari, 2017 (24)</b> |                                                                                                                                          | RCT          | 10 (3M, 7F)   | Healthy       | 33.5 (11.1) | 22.4 (2.5)             | 120             | Glucose                         | Agency         | USA     |
| Saccharin                       | A drink containing 18mg saccharin dissolved in 60ml water was consumed 10mins prior to glucose solution (75g glucose in 600ml water)     |              |               |               |             |                        |                 | Insulin                         |                |         |
| Water                           | 60ml distilled water was consumed 10mins prior to glucose solution (75g glucose in 600ml water)                                          |              |               |               |             |                        |                 | Glucagon<br>GLP-1<br>GIP        |                |         |
| <b>Nichol, 2019 (25)</b>        |                                                                                                                                          | RCT          | 10 (3M, 7F)   | Lean          | 27.0 (4.2)  | 22.8 (0.9)             | 300             | Glucose                         | Agency         | USA     |
| Sucralose                       | 60ml solution containing 48mg sucralose was consumed 10mins prior to 75g OGTT                                                            |              | 11 (1M, 10F)  | Obese         | 29.5 (4.0)  | 37.7 (5.5)             |                 | Insulin                         |                |         |
| Water                           | 60ml distilled water was consumed 10mins prior to 75g OGTT                                                                               |              |               |               |             |                        |                 | GIP                             |                |         |



|                          |                                                                                                                                           |     |             |         |            |            |     |         |   |     |
|--------------------------|-------------------------------------------------------------------------------------------------------------------------------------------|-----|-------------|---------|------------|------------|-----|---------|---|-----|
| <b>Solomi, 2020 (26)</b> |                                                                                                                                           | NRS | 10 (5M, 5F) | Healthy | 26.9 (3.3) | 24.7 (1.1) | 120 | Glucose | - | USA |
| Diet cola                | 250ml diet soda (Caffeine-Free Diet Coke) sweetened with aspartame and ace-K was consumed 10mins prior to beverage containing 25g glucose |     |             |         |            |            |     |         |   |     |
| Carbonated water         | 250ml carbonated water was consumed 10mins prior to beverage containing 25g glucose                                                       |     |             |         |            |            |     |         |   |     |

RCT, randomized controlled trial; NRS, non-randomized study; OGTT, oral glucose tolerance test; iAUC, incremental area under the curve; M, male; F, female; DM2, type 2 diabetes; N, normal; IGT, impaired glucose tolerance; HFCS, high-fructose corn syrup; CHO, carbohydrate; IDDM, insulin-dependent diabetes mellitus; NIDDM, non-insulin dependent diabetes mellitus



**Table S6. OVERALL CInEMA assessments of UNCOUPLING INTERVENTIONS examining the effect of non-nutritive sweetened beverages (NNS beverages) sweetened with individual or blends of non-nutritive sweeteners (NNS), water, and sugar-sweetened beverages (SSBs) sweetened with caloric sweeteners on postprandial blood GLUCOSE response in HEALTHY participants**

| Comparison                                      | Number of studies | Within-study bias | Reporting bias | Indirectness | Imprecision   | Heterogeneity | Incoherence | Confidence rating | Reason(s) for downgrading        |
|-------------------------------------------------|-------------------|-------------------|----------------|--------------|---------------|---------------|-------------|-------------------|----------------------------------|
| <b>DIRECT EVIDENCE</b>                          |                   |                   |                |              |               |               |             |                   |                                  |
| Ace-K + Aspartame:Sucrose                       | 1                 | No concerns       | Low risk       | No concerns  | No concerns   | No concerns   | No concerns | High              |                                  |
| Ace-K + Aspartame + Cyclamate:Sucrose           | 2                 | No concerns       | Low risk       | No concerns  | No concerns   | Some concerns | No concerns | Moderate          | Heterogeneity                    |
| AceK:Aspartame                                  | 1                 | Some concerns     | Low risk       | No concerns  | No concerns   | No concerns   | No concerns | Moderate          | Within-study bias                |
| AceK:Cyclamate                                  | 1                 | Some concerns     | Low risk       | No concerns  | No concerns   | No concerns   | No concerns | Moderate          | Within-study bias                |
| AceK:Saccharin                                  | 1                 | Some concerns     | Low risk       | No concerns  | No concerns   | No concerns   | No concerns | Moderate          | Within-study bias                |
| AceK:Sucrose                                    | 1                 | Some concerns     | Low risk       | No concerns  | No concerns   | No concerns   | No concerns | Moderate          | Within-study bias                |
| AceK:Water                                      | 1                 | Some concerns     | Low risk       | No concerns  | No concerns   | No concerns   | No concerns | Moderate          | Within-study bias                |
| Aspartame:Cyclamate                             | 1                 | Some concerns     | Low risk       | No concerns  | No concerns   | No concerns   | No concerns | Moderate          | Within-study bias                |
| Aspartame:Glucose                               | 4                 | No concerns       | Low risk       | No concerns  | No concerns   | No concerns   | No concerns | High              |                                  |
| Aspartame:Saccharin                             | 2                 | No concerns       | Low risk       | No concerns  | No concerns   | No concerns   | No concerns | High              |                                  |
| Aspartame:Sucralose                             | 1                 | No concerns       | Low risk       | No concerns  | No concerns   | No concerns   | No concerns | High              |                                  |
| Aspartame:Sucrose                               | 2                 | No concerns       | Low risk       | No concerns  | No concerns   | No concerns   | No concerns | High              |                                  |
| Aspartame:Water                                 | 4                 | No concerns       | Low risk       | No concerns  | No concerns   | No concerns   | No concerns | High              |                                  |
| Cyclamate:Saccharin                             | 1                 | Some concerns     | Low risk       | No concerns  | No concerns   | No concerns   | No concerns | Moderate          | Within-study bias                |
| Cyclamate:Sucrose                               | 1                 | Some concerns     | Low risk       | No concerns  | No concerns   | No concerns   | No concerns | Moderate          | Within-study bias                |
| Cyclamate:Water                                 | 1                 | Some concerns     | Low risk       | No concerns  | No concerns   | No concerns   | No concerns | Moderate          | Within-study bias                |
| Fructose:Glucose                                | 1                 | No concerns       | Low risk       | No concerns  | No concerns   | No concerns   | No concerns | High              |                                  |
| Fructose:Sucralose                              | 1                 | No concerns       | Low risk       | No concerns  | No concerns   | No concerns   | No concerns | High              |                                  |
| Fructose:Sucrose                                | 1                 | No concerns       | Low risk       | No concerns  | No concerns   | No concerns   | No concerns | High              |                                  |
| Glucose:Sucralose                               | 1                 | No concerns       | Low risk       | No concerns  | No concerns   | No concerns   | No concerns | High              |                                  |
| Glucose:Sucrose                                 | 1                 | No concerns       | Low risk       | No concerns  | No concerns   | No concerns   | No concerns | High              |                                  |
| Saccharin:Sucrose                               | 1                 | Some concerns     | Low risk       | No concerns  | No concerns   | No concerns   | No concerns | Moderate          | Within-study bias                |
| Saccharin:Water                                 | 2                 | Some concerns     | Low risk       | No concerns  | No concerns   | No concerns   | No concerns | Moderate          | Within-study bias                |
| Stevia:Sucrose                                  | 1                 | Some concerns     | Low risk       | No concerns  | No concerns   | No concerns   | No concerns | Moderate          | Within-study bias                |
| Sucralose:Sucrose                               | 2                 | No concerns       | Low risk       | No concerns  | No concerns   | No concerns   | No concerns | High              |                                  |
| Sucralose:Water                                 | 2                 | No concerns       | Low risk       | No concerns  | No concerns   | No concerns   | No concerns | High              |                                  |
| Sucrose:Water                                   | 2                 | No concerns       | Low risk       | No concerns  | No concerns   | No concerns   | No concerns | High              |                                  |
| <b>INDIRECT EVIDENCE</b>                        |                   |                   |                |              |               |               |             |                   |                                  |
| Ace-K + Aspartame:Ace-K + Aspartame + Cyclamate | 0                 | No concerns       | Low risk       | No concerns  | No concerns   | No concerns   | No concerns | High              |                                  |
| AceK:Ace-K + Aspartame                          | 0                 | No concerns       | Low risk       | No concerns  | No concerns   | No concerns   | No concerns | High              |                                  |
| Ace-K + Aspartame:Aspartame                     | 0                 | No concerns       | Low risk       | No concerns  | No concerns   | Some concerns | No concerns | Moderate          | Heterogeneity                    |
| Ace-K + Aspartame:Cyclamate                     | 0                 | No concerns       | Low risk       | No concerns  | No concerns   | No concerns   | No concerns | High              |                                  |
| Ace-K + Aspartame:Fructose                      | 0                 | No concerns       | Low risk       | No concerns  | No concerns   | No concerns   | No concerns | High              |                                  |
| Ace-K + Aspartame:Glucose                       | 0                 | No concerns       | Low risk       | No concerns  | No concerns   | No concerns   | No concerns | High              |                                  |
| Ace-K + Aspartame:Saccharin                     | 0                 | No concerns       | Low risk       | No concerns  | No concerns   | No concerns   | No concerns | High              |                                  |
| Ace-K + Aspartame:Stevia                        | 0                 | No concerns       | Low risk       | No concerns  | No concerns   | No concerns   | No concerns | High              |                                  |
| Ace-K + Aspartame:Sucralose                     | 0                 | No concerns       | Low risk       | No concerns  | No concerns   | Some concerns | No concerns | Moderate          | Heterogeneity                    |
| Ace-K + Aspartame:Water                         | 0                 | No concerns       | Low risk       | No concerns  | No concerns   | No concerns   | No concerns | High              |                                  |
| AceK:Ace-K + Aspartame + Cyclamate              | 0                 | No concerns       | Low risk       | No concerns  | Some concerns | No concerns   | No concerns | Moderate          | Imprecision                      |
| Ace-K + Aspartame + Cyclamate:Aspartame         | 0                 | No concerns       | Low risk       | No concerns  | Some concerns | No concerns   | No concerns | Moderate          | Imprecision                      |
| Ace-K + Aspartame + Cyclamate:Cyclamate         | 0                 | No concerns       | Low risk       | No concerns  | Some concerns | No concerns   | No concerns | Moderate          | Imprecision                      |
| Ace-K + Aspartame + Cyclamate:Fructose          | 0                 | No concerns       | Low risk       | No concerns  | No concerns   | No concerns   | No concerns | High              |                                  |
| Ace-K + Aspartame + Cyclamate:Glucose           | 0                 | No concerns       | Low risk       | No concerns  | No concerns   | No concerns   | No concerns | High              |                                  |
| Ace-K + Aspartame + Cyclamate:Saccharin         | 0                 | No concerns       | Low risk       | No concerns  | No concerns   | Some concerns | No concerns | Moderate          | Heterogeneity                    |
| Ace-K + Aspartame + Cyclamate:Stevia            | 0                 | No concerns       | Low risk       | No concerns  | No concerns   | No concerns   | No concerns | High              |                                  |
| Ace-K + Aspartame + Cyclamate:Sucralose         | 0                 | No concerns       | Low risk       | No concerns  | Some concerns | No concerns   | No concerns | Moderate          | Imprecision                      |
| Ace-K + Aspartame + Cyclamate:Water             | 0                 | No concerns       | Low risk       | No concerns  | No concerns   | Some concerns | No concerns | Moderate          | Heterogeneity                    |
| AceK:Fructose                                   | 0                 | No concerns       | Low risk       | No concerns  | No concerns   | No concerns   | No concerns | High              |                                  |
| AceK:Glucose                                    | 0                 | No concerns       | Low risk       | No concerns  | No concerns   | No concerns   | No concerns | High              |                                  |
| AceK:Stevia                                     | 0                 | Some concerns     | Low risk       | No concerns  | Some concerns | No concerns   | No concerns | Low               | Within-study bias, Imprecision   |
| AceK:Sucralose                                  | 0                 | Some concerns     | Low risk       | No concerns  | No concerns   | No concerns   | No concerns | Moderate          | Within-study bias                |
| Aspartame:Fructose                              | 0                 | No concerns       | Low risk       | No concerns  | No concerns   | No concerns   | No concerns | High              |                                  |
| Aspartame:Stevia                                | 0                 | Some concerns     | Low risk       | No concerns  | No concerns   | Some concerns | No concerns | Low               | Within-study bias, Heterogeneity |
| Cyclamate:Fructose                              | 0                 | No concerns       | Low risk       | No concerns  | No concerns   | No concerns   | No concerns | High              |                                  |
| Cyclamate:Glucose                               | 0                 | No concerns       | Low risk       | No concerns  | No concerns   | No concerns   | No concerns | High              |                                  |
| Cyclamate:Stevia                                | 0                 | Some concerns     | Low risk       | No concerns  | Some concerns | No concerns   | No concerns | Low               | Within-study bias, Imprecision   |
| Cyclamate:Sucralose                             | 0                 | Some concerns     | Low risk       | No concerns  | No concerns   | No concerns   | No concerns | Moderate          | Within-study bias                |
| Fructose:Saccharin                              | 0                 | No concerns       | Low risk       | No concerns  | No concerns   | No concerns   | No concerns | High              |                                  |
| Fructose:Stevia                                 | 0                 | No concerns       | Low risk       | No concerns  | No concerns   | No concerns   | No concerns | High              |                                  |
| Fructose:Water                                  | 0                 | No concerns       | Low risk       | No concerns  | No concerns   | No concerns   | No concerns | High              |                                  |
| Glucose:Saccharin                               | 0                 | No concerns       | Low risk       | No concerns  | No concerns   | No concerns   | No concerns | High              |                                  |
| Glucose:Stevia                                  | 0                 | No concerns       | Low risk       | No concerns  | No concerns   | No concerns   | No concerns | High              |                                  |
| Glucose:Water                                   | 0                 | No concerns       | Low risk       | No concerns  | No concerns   | No concerns   | No concerns | High              |                                  |
| Saccharin:Stevia                                | 0                 | Some concerns     | Low risk       | No concerns  | No concerns   | Some concerns | No concerns | Low               | Within-study bias, Heterogeneity |
| Saccharin:Sucralose                             | 0                 | No concerns       | Low risk       | No concerns  | No concerns   | No concerns   | No concerns | High              |                                  |
| Stevia:Sucralose                                | 0                 | Some concerns     | Low risk       | No concerns  | Some concerns | No concerns   | No concerns | Low               | Within-study bias, Imprecision   |
| Stevia:Water                                    | 0                 | Some concerns     | Low risk       | No concerns  | No concerns   | Some concerns | No concerns | Low               | Within-study bias, Heterogeneity |



**Table S7.** OVERALL CInEMA assessments of UNCOUPLING INTERVENTIONS examining the effect of non-nutritive sweetened beverages (NNS beverages) sweetened with individual or blends of non-nutritive sweeteners (NNS), water, and sugar-sweetened beverages (SSBs) sweetened with caloric sweeteners on postprandial blood GLUCOSE response in participants with TYPE 2 DIABETES

| Comparison               | Number of studies | Within-study bias | Reporting bias | Indirectness | Imprecision    | Heterogeneity  | Incoherence    | Confidence rating | Reason(s) for downgrading      |
|--------------------------|-------------------|-------------------|----------------|--------------|----------------|----------------|----------------|-------------------|--------------------------------|
| <b>DIRECT EVIDENCE</b>   |                   |                   |                |              |                |                |                |                   |                                |
| Aspartame:Glucose        | 4                 | Some concerns     | Low risk       | No concerns  | No concerns    | No concerns    | Major concerns | Low               | Within-study bias, Incoherence |
| Aspartame:Saccharin      | 1                 | No concerns       | Low risk       | No concerns  | Major concerns | No concerns    | Major concerns | Low               | Imprecision, Incoherence       |
| Aspartame:Water          | 1                 | No concerns       | Low risk       | No concerns  | Major concerns | No concerns    | Major concerns | Low               | Imprecision, Incoherence       |
| Saccharin:Water          | 1                 | No concerns       | Low risk       | No concerns  | Major concerns | No concerns    | Major concerns | Low               | Imprecision, Incoherence       |
| <b>INDIRECT EVIDENCE</b> |                   |                   |                |              |                |                |                |                   |                                |
| Glucose:Saccharin        | 0                 | No concerns       | Low risk       | No concerns  | No concerns    | Major concerns | Major concerns | Low               | Heterogeneity, Incoherence     |
| Glucose:Water            | 0                 | No concerns       | Low risk       | No concerns  | No concerns    | Major concerns | Major concerns | Low               | Heterogeneity, Incoherence     |



**Table S8. OVERALL CIneMA assessments of UNCOUPLING INTERVENTIONS examining the effect of non-nutritive sweetened beverages (NNS beverages) sweetened with individual or blends of non-nutritive sweeteners (NNS), water, and sugar-sweetened beverages (SSBs) sweetened with caloric sweeteners on postprandial blood INSULIN response in HEALTHY participants**

| Comparison                                      | Number of studies | Within-study bias | Reporting bias | Indirectness | Imprecision    | Heterogeneity  | Incoherence   | Confidence rating | Reason(s) for downgrading                     |
|-------------------------------------------------|-------------------|-------------------|----------------|--------------|----------------|----------------|---------------|-------------------|-----------------------------------------------|
| <b>DIRECT EVIDENCE</b>                          |                   |                   |                |              |                |                |               |                   |                                               |
| Ace-K + Aspartame:Sucrose                       | 1                 | No concerns       | Low risk       | No concerns  | No concerns    | No concerns    | No concerns   | High              |                                               |
| Ace-K + Aspartame + Cyclamate:Sucrose           | 2                 | No concerns       | Low risk       | No concerns  | No concerns    | No concerns    | No concerns   | High              |                                               |
| AceK:Aspartame                                  | 1                 | Some concerns     | Low risk       | No concerns  | No concerns    | Major concerns | No concerns   | Low               | Within-study bias, Heterogeneity              |
| AceK:Cyclamate                                  | 1                 | Some concerns     | Low risk       | No concerns  | No concerns    | Major concerns | No concerns   | Low               | Within-study bias, Heterogeneity              |
| AceK:Saccharin                                  | 1                 | Some concerns     | Low risk       | No concerns  | No concerns    | Major concerns | No concerns   | Low               | Within-study bias, Heterogeneity              |
| AceK:Sucrose                                    | 1                 | Some concerns     | Low risk       | No concerns  | No concerns    | No concerns    | No concerns   | Moderate          | Within-study bias                             |
| AceK:Water                                      | 1                 | Some concerns     | Low risk       | No concerns  | No concerns    | Major concerns | No concerns   | Low               | Within-study bias, Heterogeneity              |
| Aspartame:Cyclamate                             | 1                 | Some concerns     | Low risk       | No concerns  | No concerns    | Major concerns | No concerns   | Low               | Within-study bias, Heterogeneity              |
| Aspartame:Glucose                               | 4                 | No concerns       | Low risk       | No concerns  | No concerns    | No concerns    | No concerns   | High              |                                               |
| Aspartame:Saccharin                             | 2                 | No concerns       | Low risk       | No concerns  | No concerns    | Some concerns  | No concerns   | Moderate          | Heterogeneity                                 |
| Aspartame:Sucralose                             | 1                 | No concerns       | Low risk       | No concerns  | No concerns    | No concerns    | No concerns   | High              |                                               |
| Aspartame:Sucrose                               | 2                 | Some concerns     | Low risk       | No concerns  | No concerns    | No concerns    | No concerns   | Moderate          | Within-study bias                             |
| Aspartame:Water                                 | 4                 | No concerns       | Low risk       | No concerns  | No concerns    | No concerns    | No concerns   | High              |                                               |
| Cyclamate:Saccharin                             | 1                 | Some concerns     | Low risk       | No concerns  | No concerns    | Major concerns | No concerns   | Low               | Within-study bias, Heterogeneity              |
| Cyclamate:Sucrose                               | 1                 | Some concerns     | Low risk       | No concerns  | No concerns    | No concerns    | No concerns   | Moderate          | Within-study bias                             |
| Cyclamate:Water                                 | 1                 | Some concerns     | Low risk       | No concerns  | No concerns    | Major concerns | No concerns   | Low               | Within-study bias, Heterogeneity              |
| Fructose:Glucose                                | 1                 | No concerns       | Low risk       | No concerns  | No concerns    | No concerns    | No concerns   | High              |                                               |
| Fructose:Sucralose                              | 1                 | No concerns       | Low risk       | No concerns  | No concerns    | No concerns    | No concerns   | High              |                                               |
| Fructose:Sucrose                                | 1                 | No concerns       | Low risk       | No concerns  | Some concerns  | No concerns    | No concerns   | Moderate          | Imprecision                                   |
| Glucose:Sucralose                               | 1                 | No concerns       | Low risk       | No concerns  | No concerns    | No concerns    | No concerns   | High              |                                               |
| Glucose:Sucrose                                 | 1                 | No concerns       | Low risk       | No concerns  | No concerns    | No concerns    | Some concerns | Moderate          | Incoherence                                   |
| Saccharin:Sucrose                               | 1                 | Some concerns     | Low risk       | No concerns  | No concerns    | No concerns    | No concerns   | Moderate          | Within-study bias                             |
| Saccharin:Water                                 | 2                 | No concerns       | Low risk       | No concerns  | No concerns    | Some concerns  | No concerns   | Moderate          | Heterogeneity                                 |
| Sucralose:Sucrose                               | 2                 | No concerns       | Low risk       | No concerns  | No concerns    | No concerns    | No concerns   | High              |                                               |
| Sucralose:Water                                 | 2                 | No concerns       | Low risk       | No concerns  | No concerns    | No concerns    | No concerns   | High              |                                               |
| Sucrose:Water                                   | 2                 | Some concerns     | Low risk       | No concerns  | No concerns    | No concerns    | No concerns   | Moderate          | Within-study bias                             |
| <b>INDIRECT EVIDENCE</b>                        |                   |                   |                |              |                |                |               |                   |                                               |
| Ace-K + Aspartame:Ace-K + Aspartame + Cyclamate | 0                 | No concerns       | Low risk       | No concerns  | Some concerns  | Some concerns  | No concerns   | Low               | Imprecision, Heterogeneity                    |
| AceK:Ace-K + Aspartame                          | 0                 | Some concerns     | Low risk       | No concerns  | Some concerns  | Some concerns  | No concerns   | Low               | Within-study bias, Imprecision, Heterogeneity |
| Ace-K + Aspartame:Aspartame                     | 0                 | No concerns       | Low risk       | No concerns  | Some concerns  | Some concerns  | No concerns   | Low               | Imprecision, Heterogeneity                    |
| Ace-K + Aspartame:Cyclamate                     | 0                 | Some concerns     | Low risk       | No concerns  | Some concerns  | Some concerns  | No concerns   | Low               | Within-study bias, Imprecision, Heterogeneity |
| Ace-K + Aspartame:Fructose                      | 0                 | No concerns       | Low risk       | No concerns  | No concerns    | No concerns    | No concerns   | High              |                                               |
| Ace-K + Aspartame:Glucose                       | 0                 | No concerns       | Low risk       | No concerns  | No concerns    | No concerns    | No concerns   | High              |                                               |
| Ace-K + Aspartame:Saccharin                     | 0                 | No concerns       | Low risk       | No concerns  | Some concerns  | Some concerns  | No concerns   | Low               | Imprecision, Heterogeneity                    |
| Ace-K + Aspartame:Sucralose                     | 0                 | No concerns       | Low risk       | No concerns  | Some concerns  | Some concerns  | No concerns   | Low               | Imprecision, Heterogeneity                    |
| Ace-K + Aspartame:Water                         | 0                 | No concerns       | Low risk       | No concerns  | Some concerns  | Some concerns  | No concerns   | Low               | Imprecision, Heterogeneity                    |
| AceK:Ace-K + Aspartame + Cyclamate              | 0                 | Some concerns     | Low risk       | No concerns  | Major concerns | No concerns    | No concerns   | Moderate          | Within-study bias, Imprecision                |
| Ace-K + Aspartame + Cyclamate:Aspartame         | 0                 | No concerns       | Low risk       | No concerns  | Some concerns  | Some concerns  | No concerns   | Low               | Imprecision, Heterogeneity                    |
| Ace-K + Aspartame + Cyclamate:Cyclamate         | 0                 | Some concerns     | Low risk       | No concerns  | Some concerns  | Some concerns  | No concerns   | Low               | Within-study bias, Imprecision, Heterogeneity |
| Ace-K + Aspartame + Cyclamate:Fructose          | 0                 | No concerns       | Low risk       | No concerns  | No concerns    | Some concerns  | No concerns   | Moderate          | Heterogeneity                                 |
| Ace-K + Aspartame + Cyclamate:Glucose           | 0                 | No concerns       | Low risk       | No concerns  | No concerns    | No concerns    | No concerns   | High              |                                               |
| Ace-K + Aspartame + Cyclamate:Saccharin         | 0                 | No concerns       | Low risk       | No concerns  | Major concerns | No concerns    | No concerns   | Low               | Imprecision                                   |
| Ace-K + Aspartame + Cyclamate:Sucralose         | 0                 | No concerns       | Low risk       | No concerns  | Some concerns  | Some concerns  | No concerns   | Low               | Imprecision, Heterogeneity                    |
| Ace-K + Aspartame + Cyclamate:Water             | 0                 | No concerns       | Low risk       | No concerns  | Some concerns  | Some concerns  | No concerns   | Low               | Imprecision, Heterogeneity                    |
| AceK:Fructose                                   | 0                 | No concerns       | Low risk       | No concerns  | No concerns    | No concerns    | No concerns   | High              |                                               |
| AceK:Glucose                                    | 0                 | No concerns       | Low risk       | No concerns  | No concerns    | No concerns    | No concerns   | High              |                                               |
| AceK:Sucralose                                  | 0                 | Some concerns     | Low risk       | No concerns  | No concerns    | Major concerns | No concerns   | Low               | Within-study bias, Heterogeneity              |
| Aspartame:Fructose                              | 0                 | No concerns       | Low risk       | No concerns  | No concerns    | No concerns    | No concerns   | High              |                                               |
| Cyclamate:Fructose                              | 0                 | No concerns       | Low risk       | No concerns  | No concerns    | Some concerns  | No concerns   | Moderate          | Heterogeneity                                 |
| Cyclamate:Glucose                               | 0                 | No concerns       | Low risk       | No concerns  | No concerns    | No concerns    | No concerns   | High              |                                               |
| Cyclamate:Sucralose                             | 0                 | Some concerns     | Low risk       | No concerns  | No concerns    | Major concerns | No concerns   | Low               | Within-study bias, Heterogeneity              |
| Fructose:Saccharin                              | 0                 | No concerns       | Low risk       | No concerns  | No concerns    | No concerns    | No concerns   | High              |                                               |
| Fructose:Water                                  | 0                 | No concerns       | Low risk       | No concerns  | No concerns    | No concerns    | No concerns   | High              |                                               |
| Glucose:Saccharin                               | 0                 | No concerns       | Low risk       | No concerns  | No concerns    | No concerns    | No concerns   | High              |                                               |
| Glucose:Water                                   | 0                 | No concerns       | Low risk       | No concerns  | No concerns    | No concerns    | No concerns   | High              |                                               |
| Saccharin:Sucralose                             | 0                 | No concerns       | Low risk       | No concerns  | No concerns    | Major concerns | No concerns   | Low               | Heterogeneity                                 |



**Table S9.** OVERALL CInEMA assessments of UNCOUPLING INTERVENTIONS examining the effect of non-nutritive sweetened beverages (NNS beverages) sweetened with individual or blends of non-nutritive sweeteners (NNS), water, and sugar-sweetened beverages (SSBs) sweetened with caloric sweeteners on postprandial blood INSULIN response in participants with TYPE 2 DIABETES

| Comparison               | Number of studies | Within-study bias | Reporting bias | Indirectness | Imprecision    | Heterogeneity  | Incoherence    | Confidence rating | Reason(s) for downgrading                             |
|--------------------------|-------------------|-------------------|----------------|--------------|----------------|----------------|----------------|-------------------|-------------------------------------------------------|
| <b>DIRECT EVIDENCE</b>   |                   |                   |                |              |                |                |                |                   |                                                       |
| Aspartame:Glucose        | 4                 | Some concerns     | Low risk       | No concerns  | No concerns    | Major concerns | Major concerns | Very low          | ["Within-study bias", "Heterogeneity", "Incoherence"] |
| Aspartame:Saccharin      | 1                 | No concerns       | Low risk       | No concerns  | Major concerns | No concerns    | Major concerns | Low               | ["Imprecision", "Incoherence"]                        |
| Aspartame:Water          | 1                 | No concerns       | Low risk       | No concerns  | Major concerns | No concerns    | Major concerns | Low               | ["Imprecision", "Incoherence"]                        |
| Saccharin:Water          | 1                 | No concerns       | Low risk       | No concerns  | Major concerns | No concerns    | Major concerns | Low               | ["Imprecision", "Incoherence"]                        |
| <b>INDIRECT EVIDENCE</b> |                   |                   |                |              |                |                |                |                   |                                                       |
| Glucose:Saccharin        | 0                 | No concerns       | Low risk       | No concerns  | Some concerns  | Some concerns  | Major concerns | Very low          | ["Imprecision", "Heterogeneity", "Incoherence"]       |
| Glucose:Water            | 0                 | No concerns       | Low risk       | No concerns  | Some concerns  | Some concerns  | Major concerns | Very low          | ["Imprecision", "Heterogeneity", "Incoherence"]       |



**Table S10.** GRADE assessments of UNCOUPLING INTERVENTIONS examining the effect of non-nutritive sweetened beverages (NNS beverages) sweetened with individual or blends of non-nutritive sweeteners (NNS), water, and sugar-sweetened beverages (SSBs) sweetened with caloric sweeteners on postprandial blood GLP-1 response in HEALTHY participants

| Treatments              | Effect Estimate                           | GRADE Assessments |   |   |   |   |   | Overall |
|-------------------------|-------------------------------------------|-------------------|---|---|---|---|---|---------|
|                         |                                           | 1                 | 2 | 3 | 4 | 5 | 6 |         |
| Aspartame vs. Sucrose   | 262.15<br>(-12.991, 537.291)              | -                 | - | ↓ | ↓ | - | - | LOW ⊕⊕  |
| Aspartame vs. Water     | -86.97<br>(-345.469, 171.529)             | -                 | - | ↓ | ↓ | - | - | LOW ⊕⊕  |
| Sucralose vs. Water     | 0.00<br>(-3251.947, 3251.947)             | -                 | - | ↓ | ↓ | - | - | LOW ⊕⊕  |
| Water vs. Sucrose       | <b>349.12</b><br><b>(63.721, 634.519)</b> | -                 | - | ↓ | ↓ | - | - | LOW ⊕⊕  |
| Aspartame vs. Sucralose | -86.97<br>(-3349.174, 3175.234)           | -                 | - | ↓ | ↓ | - | - | LOW ⊕⊕  |
| Sucralose vs. Sucrose   | 349.12<br>(-2915.326, 3613.566)           | -                 | - | ↓ | ↓ | - | - | LOW ⊕⊕  |

Data reported as mean difference with 95% confidence intervals (CIs). Due to lack of available trial data, the CINeMA (Confidence in Network Meta-Analysis) web application was unable to make judgements for the six domains. Thus, manual judgements were made based on the CINeMA framework (27, 28). GRADE domains refer to: (1), within-study bias; (2), reporting bias; (3), indirectness; (4), imprecision; (5) heterogeneity; and (6) incoherence. The risk of bias domain was assessed using the Cochrane RoB2 tool (no downgrade if there was no concern for overall risk of bias; downgraded if there was some or major concern for overall risk of bias). Evidence was downgraded for imprecision if 95% CIs overlapped the minimally important difference of 82 pmol\*min/L. Evidence was downgraded for indirectness due lack of available trial data. There is no general consensus on a clinically important size difference for 2-hour blood GLP-1 incremental area under the curve (iAUC). Health Canada considers a 20% reduction in glucose iAUC to be the minimum physiologically relevant difference as per “Guideline Concerning the Safety and Physiological Effects of Novel Fibre Sources and Food Products Containing Them” (29) [xx]. Extrapolating the 20% threshold in glucose iAUC, we calculated the MID of GLP-1 iAUC by taking 20% of 412 pmol\*mins/L which is the median of the difference in GLP-1 iAUC among healthy participants (~95 pmol\*mins/L) and those with type 2 diabetes (~633 pmol\*mins/L) after a glucose or meal tolerance test (30). Significant results are bolded in black. Non-significant results are grey and not bolded. Trivial (significant) effects (<1 MID) or no effects have a white background; small important effects (>1 MID) have a light blue background; moderate effects (>2 MID) have a darker blue background; large effects (>5 to <10 MID) have a purple background; very large effects (>10 MID) have a black background. Confidence in the effect estimate is shown for each treatment comparison: high confidence ⊕⊕⊕⊕; moderate confidence ⊕⊕⊕; low confidence ⊕⊕; very low confidence ⊕



**Table S11.** GRADE assessments of UNCOUPLING INTERVENTIONS examining the effect of non-nutritive sweetened beverages (NNS beverages) sweetened with individual or blends of non-nutritive sweeteners (NNS), water, and sugar-sweetened beverages (SSBs) sweetened with caloric sweeteners on postprandial blood GIP response in HEALTHY participants

| Treatments            | Effect Estimate                | GRADE Assessments |   |   |   |   |   | Overall        |
|-----------------------|--------------------------------|-------------------|---|---|---|---|---|----------------|
|                       |                                | 1                 | 2 | 3 | 4 | 5 | 6 |                |
| Aspartame vs. Sucrose | 1007.80<br>(675.588, 1340.012) | -                 | - | ↓ | - | - | - | MODERATE<br>⊕⊕ |
| Aspartame vs. Water   | 23.21<br>(-238.591, 285.011)   | -                 |   | ↓ | ↓ | - | - | LOW<br>⊕⊕      |
| Water vs. Sucrose     | 984.59<br>(649.367, 1319.813)  | -                 | - | ↓ | - | - | - | MODERATE<br>⊕⊕ |

Data reported as mean difference with 95% confidence intervals (CIs). Due to lack of available trial data, the CINeMA (Confidence in Network Meta-Analysis) web application was unable to make judgements for the six domains. Thus, manual judgements were made based on the CINeMA framework (27, 28). GRADE domains refer to: (1), within-study bias; (2), reporting bias; (3), indirectness; (4), imprecision; (5) heterogeneity; and (6) incoherence. The risk of bias domain was assessed using the Cochrane RoB2 tool (no downgrade if there was no concern for overall risk of bias; downgraded if there was some or major concern for overall risk of bias). Evidence was downgraded for imprecision if 95% CIs overlapped the minimally important difference of 94 pmol\*min/L. Evidence was downgraded for indirectness due lack of available trial data. There is no general consensus on a clinically important size difference for 2-hour blood GIP incremental area under the curve (iAUC). Health Canada considers a 20% reduction in glucose iAUC to be the minimum physiologically relevant difference as per “Guideline Concerning the Safety and Physiological Effects of Novel Fibre Sources and Food Products Containing Them” (29). Extrapolating the 20% threshold in glucose iAUC, we calculated the MID of GIP iAUC by taking 20% of 468 pmol\*mins/L which is the median of the difference in GIP iAUC among healthy participants (~168 pmol\*mins/L) and those with type 2 diabetes (~768 pmol\*mins/L) after a glucose or meal tolerance test (31). Significant results are bolded in white. Non-significant results are grey and not bolded. Trivial (significant) effects (<1 MID) or no effects have a white background; small important effects (>1 MID) have a light blue background; moderate effects (>2 MID) have a darker blue background; large effects (>5 to <10 MID) have a purple background; very large effects (>10 MID) have a black background. Confidence in the effect estimate is shown for each treatment comparison: high confidence ⊕⊕⊕⊕; moderate confidence ⊕⊕⊕; low confidence ⊕⊕; very low confidence ⊕



**Table S12.** GRADE assessments of UNCOUPLING INTERVENTIONS examining the effect of non-nutritive sweetened beverages (NNS beverages) sweetened with individual or blends of non-nutritive sweeteners (NNS), water, and sugar-sweetened beverages (SSBs) sweetened with caloric sweeteners on postprandial blood GHRELIN response in HEALTHY participants

| Treatments            | Effect Estimate               | GRADE Assessments |   |   |   |   |   | Overall   |
|-----------------------|-------------------------------|-------------------|---|---|---|---|---|-----------|
|                       |                               | 1                 | 2 | 3 | 4 | 5 | 6 |           |
| Aspartame vs. Sucrose | -29.56<br>(-357.818, 298.698) | -                 | - | ↓ | ↓ | - | - | LOW<br>⊕⊕ |
| Aspartame vs. Water   | 19.40<br>(-330.006, 368.806)  | -                 | - | ↓ | ↓ | - | - | LOW<br>⊕⊕ |
| Water vs. Sucrose     | -48.96<br>(-425.914, 327.994) | -                 | - | ↓ | ↓ | - | - | LOW<br>⊕⊕ |

Data reported as mean difference with 95% confidence intervals (CIs). Due to lack of available trial data, the CINeMA (Confidence in Network Meta-Analysis) web application was unable to make judgements for the six domains. Thus, manual judgements were made based on the CINeMA framework (27, 28) (reference). GRADE domains refer to: (1), within-study bias; (2), reporting bias; (3), indirectness; (4), imprecision; (5) heterogeneity; and (6) incoherence. The risk of bias domain was assessed using the Cochrane RoB2 tool (no downgrade if there was no concern for overall risk of bias; downgraded if there was some or major concern for overall risk of bias). Evidence was downgraded for imprecision if 95% CIs overlapped the minimally important difference of 9.8 pmol\*min/L. Evidence was downgraded for indirectness due lack of available trial data. There is no general consensus on a clinically important size difference for 2-hour blood ghrelin incremental area under the curve (iAUC). Health Canada considers a 20% reduction in glucose iAUC to be the minimum physiologically relevant difference as per “Guideline Concerning the Safety and Physiological Effects of Novel Fibre Sources and Food Products Containing Them” (29). Extrapolating the 20% threshold in glucose iAUC, we calculated the MID of ghrelin iAUC by taking 20% of 20% of -49.0 pmol\*min/L (sucrose vs. water comparison) which was -9.8 pmol\*mins/L. Significant results are bolded in black. Non-significant results are grey and not bolded. Trivial (significant) effects (<1 MID) or no effects have a white background; small important effects (>1 MID) have a light blue background; moderate effects (>2 MID) have a darker blue background; large effects (>5 to <10 MID) have a purple background; very large effects (>10 MID) have a black background. Confidence in the effect estimate is shown for each treatment comparison: high confidence ⊕⊕⊕⊕; moderate confidence ⊕⊕⊕; low confidence ⊕⊕; very low confidence ⊕



**Table S13.** GRADE assessments of UNCOUPLING INTERVENTIONS examining the effect of non-nutritive sweetened beverages (NNS beverages) sweetened with individual or blends of non-nutritive sweeteners (NNS), water, and sugar-sweetened beverages (SSBs) sweetened with caloric sweeteners on postprandial blood GLUCAGON response in HEALTHY participants

| Treatments              | Effect Estimate                    | GRADE Assessments |   |   |   |   |   | Overall   |
|-------------------------|------------------------------------|-------------------|---|---|---|---|---|-----------|
|                         |                                    | 1                 | 2 | 3 | 4 | 5 | 6 |           |
| Aspartame vs. Saccharin | -1203.101<br>(-7381.296, 4975.093) | -                 | - | ↓ | ↓ | - | - | LOW<br>⊕⊕ |
| Aspartame vs. Water     | 914.930<br>(-4370.027, 6199.888)   | -                 | - | ↓ | ↓ | - | - | LOW<br>⊕⊕ |
| Saccharin vs. Water     | 2118.032<br>(-3598.818, 7834.882)  | -                 | - | ↓ | ↓ | - | - | LOW<br>⊕⊕ |
| Aspartame vs. Glucose   | 59.273<br>(-1170.323, 1288.868)    | -                 | - | ↓ | ↓ | - | - | LOW<br>⊕⊕ |
| Saccharin vs. Glucose   | 1262.374<br>(-5036.991, 7561.739)  | -                 | - | ↓ | ↓ | - | - | LOW<br>⊕⊕ |
| Water vs. Glucose       | -855.658<br>(-6281.769, 4570.453)  | -                 | - | ↓ | ↓ | - | - | LOW<br>⊕⊕ |

Data reported as mean difference with 95% confidence intervals (CIs). Due to lack of available trial data, the CINeMA (Confidence in Network Meta-Analysis) web application was unable to make judgements for the six domains. Thus, manual judgements were made based on the CINeMA framework (27, 28). GRADE domains refer to: (1), within-study bias; (2), reporting bias; (3), indirectness; (4), imprecision; (5) heterogeneity; and (6) incoherence. The risk of bias domain was assessed using the Cochrane RoB2 tool (no downgrade if there was no concern for overall risk of bias; downgraded if there was some or major concern for overall risk of bias). Evidence was downgraded for imprecision if 95% CIs overlapped the minimally important difference of 205 pmol\*min/L. Evidence was downgraded for indirectness due lack of available trial data. There is no general consensus on a clinically important size difference for 2-hour blood glucagon incremental area under the curve (iAUC). Health Canada considers a 20% reduction in glucose iAUC to be the minimum physiologically relevant difference as per “Guideline Concerning the Safety and Physiological Effects of Novel Fibre Sources and Food Products Containing Them” (29). Extrapolating the 20% threshold in glucose iAUC, we calculated the MID of glucagon iAUC by taking 20% of 1025 pmol\*mins/L which is the median value of glucagon iAUC (water vs. glucose comparisons) in healthy individuals (~850 pmol\*mins/L) and those with type 2 diabetes (~1200 pmol\*mins/L). Significant results are bolded in black. Non-significant results are grey and not bolded. Trivial (significant) effects (<1 MID) or no effects have a white background; small important effects (>1 MID) have a light blue background; moderate effects (>2 MID) have a darker blue background; large effects (>5 to <10 MID) have a purple background; very large effects (>10 MID) have a black background. Confidence in the effect estimate is shown for each treatment comparison: high confidence ⊕⊕⊕⊕; moderate confidence ⊕⊕⊕; low confidence ⊕⊕; very low confidence ⊕



**Table S14.** GRADE assessments of UNCOUPLING INTERVENTIONS examining the effect of non-nutritive sweetened beverages (NNS beverages) sweetened with individual or blends of non-nutritive sweeteners (NNS), water, and sugar-sweetened beverages (SSBs) sweetened with caloric sweeteners on postprandial blood GLUCAGON response in participants with TYPE 2 DIABETES

| Treatments              | Effect Estimate                    | GRADE Assessments |   |   |   |   |   | Overall   |
|-------------------------|------------------------------------|-------------------|---|---|---|---|---|-----------|
|                         |                                    | 1                 | 2 | 3 | 4 | 5 | 6 |           |
| Aspartame vs. Saccharin | -140.368<br>(-4533.755, 4253.019)  | -                 | - | ↓ | ↓ | - | - | LOW<br>⊕⊕ |
| Aspartame vs. Water     | 1003.800<br>(-4010.785, 6018.385)  | -                 | - | ↓ | ↓ | - | - | LOW<br>⊕⊕ |
| Saccharin vs. Water     | 1144.168<br>(-3847.925, 6136.261)  | -                 | - | ↓ | ↓ | - | - | LOW<br>⊕⊕ |
| Aspartame vs. Glucose   | -198.894<br>(-975.641, 577.854)    | -                 | - | ↓ | ↓ | - | - | LOW<br>⊕⊕ |
| Saccharin vs. Glucose   | -58.526<br>(-4520.048, 4402.997)   | -                 | - | ↓ | ↓ | - | - | LOW<br>⊕⊕ |
| Water vs. Glucose       | -1202.694<br>(-6277.080, 3871.693) | -                 | - | ↓ | ↓ | - | - | LOW<br>⊕⊕ |

Data reported as mean difference with 95% confidence intervals (CIs). Due to lack of available trial data, the CINeMA (Confidence in Network Meta-Analysis) web application was unable to make judgements for the six domains. Thus, manual judgements were made based on the CINeMA framework (27, 28) (reference). GRADE domains refer to: (1), within-study bias; (2), reporting bias; (3), indirectness; (4), imprecision; (5) heterogeneity; and (6) incoherence. The risk of bias domain was assessed using the Cochrane RoB2 tool (no downgrade if there was no concern for overall risk of bias; downgraded if there was some or major concern for overall risk of bias). Evidence was downgraded for imprecision if 95% CIs overlapped the minimally important difference of 205 pmol\*min/L. Evidence was downgraded for indirectness due lack of available trial data. There is no general consensus on a clinically important size difference for 2-hour blood glucagon incremental area under the curve (iAUC). Health Canada considers a 20% reduction in glucose iAUC to be the minimum physiologically relevant difference as per “Guideline Concerning the Safety and Physiological Effects of Novel Fibre Sources and Food Products Containing Them” (29). Extrapolating the 20% threshold in glucose iAUC, we calculated the MID of glucagon iAUC by taking 20% of 1025 pmol\*mins/L which is the median value of glucagon iAUC (water vs. glucose comparisons) in healthy individuals (~850 pmol\*mins/L) and those with type 2 diabetes (~1200 pmol\*mins/L). Significant results are bolded in black. Non-significant results are grey and not bolded. Trivial (significant) effects (<1 MID) or no effects have a white background; small important effects (>1 MID) have a light blue background; moderate effects (>2 MID) have a darker blue background; large effects (>5 to <10 MID) have a purple background; very large effects (>10 MID) have a black background. Confidence in the effect estimate is shown for each treatment comparison: high confidence ⊕⊕⊕⊕; moderate confidence ⊕⊕⊕; low confidence ⊕⊕; very low confidence ⊕



**Table S15.** GRADE assessments of COUPLING INTERVENTIONS examining the effect of non-nutritive sweetened beverages (NNS beverages) sweetened with individual or blends of non-nutritive sweeteners (NNS) and controls on postprandial blood GLUCOSE response in HEALTHY participants

| Treatments                    | Effect Estimate             | GRADE Assessments |   |   |   |   |   | Overall   |
|-------------------------------|-----------------------------|-------------------|---|---|---|---|---|-----------|
|                               |                             | 1                 | 2 | 3 | 4 | 5 | 6 |           |
| Aspartame vs. Aspartame+Ace-K | 31.639<br>(-33.462, 96.739) | ↓                 | - | ↓ | ↓ | - | - | LOW<br>⊕⊕ |
| Aspartame vs. Control         | 32.538<br>(-24.927, 90.004) | -                 | - | ↓ | ↓ | - | - | LOW<br>⊕⊕ |
| Aspartame+Ace-K vs. Control   | 0.900<br>(-29.689, 31.489)  | ↓                 | - | ↓ | ↓ | - | - | LOW<br>⊕⊕ |

Data reported as mean difference with 95% confidence intervals (CIs). Due to lack of available trial data, the CINeMA (Confidence in Network Meta-Analysis) web application was unable to make judgements for the six domains. Thus, manual judgements were made based on the CINeMA framework (27, 28). GRADE domains refer to: (1), within-study bias; (2), reporting bias; (3), indirectness; (4), imprecision; (5) heterogeneity; and (6) incoherence. The risk of bias domain was assessed using the Cochrane RoB2 tool (no downgrade if there was no concern for overall risk of bias; downgraded if there was some or major concern for overall risk of bias). Evidence was downgraded for imprecision if 95% CIs overlapped the minimally important difference of 100 mmol\*min/L. Evidence was downgraded for indirectness due lack of available trial data. There is no general consensus on a clinically important size difference for 2-hour blood glucose incremental area under the curve (iAUC). Health Canada considers a 20% reduction in glucose iAUC to be the minimum physiologically relevant difference as per “Guideline Concerning the Safety and Physiological Effects of Novel Fibre Sources and Food Products Containing Them” (29). Thus, we calculated the MID of glucose iAUC by taking 20% of 500 mmol\*mins/L which is the median of glucose iAUC in healthy participants (~300 mmol\*mins/L) and those with type 2 diabetes (~700 mmol\*mins/L) after a 75-g oral glucose tolerance test (32-34). Significant results are bolded in black. Non-significant results are grey and not bolded. Trivial (significant) effects (<1 MID) or no effects have a white background; small important effects (>1 MID) have a light blue background; moderate effects (>2 MID) have a darker blue background; large effects (>5 to <10 MID) have a purple background; very large effects (>10 MID) have a black background. Confidence in the effect estimate is shown for each treatment comparison: high confidence ⊕⊕⊕⊕; moderate confidence ⊕⊕⊕; low confidence ⊕⊕; very low confidence ⊕



**Table S16.** GRADE assessments of COUPLING INTERVENTIONS examining the effect of non-nutritive sweetened beverages (NNS beverages) sweetened with individual or blends of non-nutritive sweeteners (NNS) and controls on postprandial blood INSULIN response in HEALTHY participants

| Treatments                        | Effect Estimate                     | GRADE Assessments |   |   |   |   |   | Overall   |
|-----------------------------------|-------------------------------------|-------------------|---|---|---|---|---|-----------|
|                                   |                                     | 1                 | 2 | 3 | 4 | 5 | 6 |           |
| Aspartame vs. Unsweetened Control | 1718.16<br>(-2926.557, 6362.877)    | ↓                 | - | ↓ | ↓ | - | - | LOW<br>⊕⊕ |
| Aspartame vs. Sucrose             | 33234.84<br>(-9197.392, 75667.071)  | -                 | - | ↓ | ↓ | - | - | LOW<br>⊕⊕ |
| Unsweetened Control vs. Sucrose   | 31516.68<br>(-11169.005, 74202.364) | ↓                 | - | ↓ | ↓ | - | - | LOW<br>⊕⊕ |

Data reported as mean difference with 95% confidence intervals (CIs). Due to lack of available trial data, the CINeMA (Confidence in Network Meta-Analysis) web application was unable to make judgements for the six domains. Thus, manual judgements were made based on the CINeMA framework (27, 28). GRADE domains refer to: (1), within-study bias; (2), reporting bias; (3), indirectness; (4), imprecision; (5) heterogeneity; and (6) incoherence. The risk of bias domain was assessed using the Cochrane RoB2 tool (no downgrade if there was no concern for overall risk of bias; downgraded if there was some or major concern for overall risk of bias). Evidence was downgraded for imprecision if 95% CIs overlapped the minimally important difference of 2250 pmol\*min/L. Evidence was downgraded for indirectness due lack of available trial data. There is no general consensus on a clinically important size difference for 2-hour blood insulin incremental area under the curve (iAUC). Health Canada considers a 20% reduction in glucose iAUC to be the minimum physiologically relevant difference as per “Guideline Concerning the Safety and Physiological Effects of Novel Fibre Sources and Food Products Containing Them” (29). Extrapolating the 20% threshold in glucose iAUC, we calculated the MID of insulin iAUC by taking 20% of 11250 pmol\*mins/L which is the median of insulin iAUC in participants with type 2 diabetes (~6200 pmol\*mins/L) and healthy participants (~16300 pmol\*mins/L) after a 75-g oral glucose tolerance test (32-34). Non-significant results are grey and not bolded. Trivial (significant) effects (<1 MID) or no effects have a white background; small important effects (>1 MID) have a light blue background; moderate effects (>2 MID) have a darker blue background; large effects (>5 to <10 MID) have a purple background; very large effects (>10 MID) have a black background. Confidence in the effect estimate is shown for each treatment comparison: high confidence ⊕⊕⊕⊕; moderate confidence ⊕⊕⊕; low confidence ⊕⊕; very low confidence ⊕



**Table S17.** OVERALL CIneMA assessments of DELAYED COUPLING INTERVENTIONS examining the effect of non-nutritive sweetened beverages (NNS beverages) sweetened with individual or blends of non-nutritive sweeteners (NNS) and water on postprandial blood GLUCOSE response in HEALTHY participants

| Comparison                                      | Number of studies | Within-study bias | Reporting bias | Indirectness | Imprecision    | Heterogeneity  | Incoherence | Confidence rating | Reason(s) for downgrading  |
|-------------------------------------------------|-------------------|-------------------|----------------|--------------|----------------|----------------|-------------|-------------------|----------------------------|
| <b>DIRECT EVIDENCE</b>                          |                   |                   |                |              |                |                |             |                   |                            |
| Ace-K + Aspartame:Water                         | 1                 | Some concerns     | Low risk       | No concerns  | No concerns    | No concerns    | No concerns | Moderate          | Within-study bias          |
| Ace-K + Aspartame + Sucralose:Ace-K + Sucralose | 1                 | No concerns       | Low risk       | No concerns  | No concerns    | Some concerns  | No concerns | Moderate          | Heterogeneity              |
| Ace-K + Aspartame + Sucralose:Water             | 1                 | No concerns       | Low risk       | No concerns  | No concerns    | Some concerns  | No concerns | Moderate          | Heterogeneity              |
| Ace-K + Sucralose:Water                         | 2                 | No concerns       | Low risk       | No concerns  | No concerns    | No concerns    | No concerns | High              |                            |
| Aspartame:Sucralose                             | 1                 | No concerns       | Low risk       | No concerns  | Some concerns  | Some concerns  | No concerns | Low               | Imprecision, Heterogeneity |
| Aspartame:Water                                 | 1                 | No concerns       | Low risk       | No concerns  | Some concerns  | Some concerns  | No concerns | Low               | Imprecision, Heterogeneity |
| Saccharin:Water                                 | 1                 | No concerns       | Low risk       | No concerns  | Major concerns | No concerns    | No concerns | Moderate          | Imprecision                |
| Sucralose:Water                                 | 4                 | No concerns       | Low risk       | No concerns  | No concerns    | No concerns    | No concerns | High              |                            |
| <b>INDIRECT EVIDENCE</b>                        |                   |                   |                |              |                |                |             |                   |                            |
| Ace-K + Aspartame:Ace-K + Aspartame + Sucralose | 0                 | No concerns       | Low risk       | No concerns  | No concerns    | Major concerns | No concerns | Moderate          | Heterogeneity              |
| Ace-K + Aspartame:Ace-K + Sucralose             | 0                 | No concerns       | Low risk       | No concerns  | No concerns    | Some concerns  | No concerns | Moderate          | Heterogeneity              |
| Ace-K + Aspartame:Aspartame                     | 0                 | No concerns       | Low risk       | No concerns  | Some concerns  | Some concerns  | No concerns | Low               | Imprecision, Heterogeneity |
| Ace-K + Aspartame:Saccharin                     | 0                 | No concerns       | Low risk       | No concerns  | Major concerns | No concerns    | No concerns | Moderate          | Imprecision                |
| Ace-K + Aspartame:Sucralose                     | 0                 | No concerns       | Low risk       | No concerns  | No concerns    | Some concerns  | No concerns | Moderate          | Heterogeneity              |
| Ace-K + Aspartame + Sucralose:Aspartame         | 0                 | No concerns       | Low risk       | No concerns  | Some concerns  | Some concerns  | No concerns | Low               | Imprecision, Heterogeneity |
| Ace-K + Aspartame + Sucralose:Saccharin         | 0                 | No concerns       | Low risk       | No concerns  | Major concerns | No concerns    | No concerns | Moderate          | Imprecision                |
| Ace-K + Aspartame + Sucralose:Sucralose         | 0                 | No concerns       | Low risk       | No concerns  | Some concerns  | No concerns    | No concerns | Moderate          | Imprecision                |
| Ace-K + Sucralose:Aspartame                     | 0                 | No concerns       | Low risk       | No concerns  | Some concerns  | Some concerns  | No concerns | Low               | Imprecision, Heterogeneity |
| Ace-K + Sucralose:Saccharin                     | 0                 | No concerns       | Low risk       | No concerns  | Major concerns | No concerns    | No concerns | Moderate          | Imprecision                |
| Ace-K + Sucralose:Sucralose                     | 0                 | No concerns       | Low risk       | No concerns  | No concerns    | No concerns    | No concerns | High              |                            |
| Aspartame:Saccharin                             | 0                 | No concerns       | Low risk       | No concerns  | Some concerns  | Some concerns  | No concerns | Low               | Imprecision, Heterogeneity |
| Saccharin:Sucralose                             | 0                 | No concerns       | Low risk       | No concerns  | Some concerns  | Some concerns  | No concerns | Low               | Imprecision, Heterogeneity |



**Table S18.** GRADE assessments of DELAYED COUPLING INTERVENTIONS examining the effect of non-nutritive sweetened beverages (NNS beverages) sweetened with individual or blends of non-nutritive sweeteners (NNS) and water on postprandial blood GLUCOSE response in participants with TYPE 2 DIABETES

| Treatments                    | Effect Estimate                | GRADE Assessments |   |   |   |   |   | Overall   |
|-------------------------------|--------------------------------|-------------------|---|---|---|---|---|-----------|
|                               |                                | 1                 | 2 | 3 | 4 | 5 | 6 |           |
| Aspartame vs. Sucralose       | -33.230<br>(-263.439, 196.979) | -                 | - | ↓ | ↓ | - | - | LOW<br>⊕⊕ |
| Aspartame vs. Sucralose+Ace-K | 43.516<br>(-264.436, 351.467)  | -                 | - | ↓ | ↓ | - | - | LOW<br>⊕⊕ |
| Aspartame vs. Water           | -9.950<br>(-269.812, 249.912)  | -                 | - | ↓ | ↓ | - | - | LOW<br>⊕⊕ |
| Sucralose vs. Sucralose+Ace-K | 76.746<br>(-206.631, 360.122)  | -                 | - | ↓ | ↓ | - | - | LOW<br>⊕⊕ |
| Sucralose vs. Water           | 23.280<br>(-206.929, 253.489)  | -                 | - | ↓ | ↓ | - | - | LOW<br>⊕⊕ |
| Sucralose+Ace-K vs. Water     | -53.466<br>(-218.711, 111.780) | -                 | - | ↓ | ↓ | - | - | LOW<br>⊕⊕ |

Data reported as mean difference with 95% confidence intervals (CIs). Due to lack of available trial data, the CINeMA (Confidence in Network Meta-Analysis) web application was unable to make judgements for the six domains. Thus, manual judgements were made based on the CINeMA framework (27, 28). GRADE domains refer to: (1), within-study bias; (2), reporting bias; (3), indirectness; (4), imprecision; (5) heterogeneity; and (6) incoherence. The risk of bias domain was assessed using the Cochrane RoB2 tool (no downgrade if there was no concern for overall risk of bias; downgraded if there was some or major concern for overall risk of bias). Evidence was downgraded for imprecision if 95% CIs overlapped the minimally important difference of 100 mmol\*min/L. Evidence was downgraded for indirectness due lack of available trial data. There is no general consensus on a clinically important size difference for 2-hour blood glucose incremental area under the curve (iAUC). Health Canada considers a 20% reduction in glucose iAUC to be the minimum physiologically relevant difference as per “Guideline Concerning the Safety and Physiological Effects of Novel Fibre Sources and Food Products Containing Them” (29). Thus, we calculated the MID of glucose iAUC by taking 20% of 500 mmol\*mins/L which is the median of glucose iAUC in healthy participants (~300 mmol\*mins/L) and those with type 2 diabetes (~700 mmol\*mins/L). Significant results are bolded in black. Non-significant results are grey and not bolded. Trivial (significant) effects (<1 MID) or no effects have a white background; small important effects (>1 MID) have a light blue background; moderate effects (>2 MID) have a darker blue background; large effects (>5 to <10 MID) have a purple background; very large effects (>10 MID) have a black background. Confidence in the effect estimate is shown for each treatment comparison: high confidence ⊕⊕⊕⊕; moderate confidence ⊕⊕⊕; low confidence ⊕⊕; very low confidence ⊕



**Table S19.** OVERALL CINeMA assessments of DELAYED COUPLING INTERVENTIONS examining the effect of non-nutritive sweetened beverages (NNS beverages) sweetened with individual or blends of non-nutritive sweeteners (NNS) and water on postprandial blood INSULIN response in HEALTHY participants

| Comparison                                      | Number of studies | Within-study bias | Reporting bias | Indirectness | Imprecision    | Heterogeneity | Incoherence | Confidence rating | Reason(s) for downgrading |
|-------------------------------------------------|-------------------|-------------------|----------------|--------------|----------------|---------------|-------------|-------------------|---------------------------|
| <b>DIRECT EVIDENCE</b>                          |                   |                   |                |              |                |               |             |                   |                           |
| Ace-K + Aspartame + Sucralose:Ace-K + Sucralose | 1                 | No concerns       | Low risk       | No concerns  | Major concerns | No concerns   | No concerns | Moderate          | Imprecision               |
| Ace-K + Aspartame + Sucralose:Water             | 1                 | No concerns       | Low risk       | No concerns  | Major concerns | No concerns   | No concerns | Moderate          | Imprecision               |
| Ace-K + Sucralose:Water                         | 2                 | No concerns       | Low risk       | No concerns  | Major concerns | No concerns   | No concerns | Moderate          | Imprecision               |
| Aspartame:Sucralose                             | 1                 | No concerns       | Low risk       | No concerns  | Major concerns | No concerns   | No concerns | Moderate          | Imprecision               |
| Aspartame:Water                                 | 1                 | No concerns       | Low risk       | No concerns  | Major concerns | No concerns   | No concerns | Moderate          | Imprecision               |
| Saccharin:Water                                 | 1                 | No concerns       | Low risk       | No concerns  | Major concerns | No concerns   | No concerns | Moderate          | Imprecision               |
| Sucralose:Water                                 | 4                 | No concerns       | Low risk       | No concerns  | Major concerns | No concerns   | No concerns | Moderate          | Imprecision               |
| <b>INDIRECT EVIDENCE</b>                        |                   |                   |                |              |                |               |             |                   |                           |
| Ace-K + Aspartame + Sucralose:Aspartame         | 0                 | No concerns       | Low risk       | No concerns  | Major concerns | No concerns   | No concerns | Moderate          | Imprecision               |
| Ace-K + Aspartame + Sucralose:Saccharin         | 0                 | No concerns       | Low risk       | No concerns  | Major concerns | No concerns   | No concerns | Moderate          | Imprecision               |
| Ace-K + Aspartame + Sucralose:Sucralose         | 0                 | No concerns       | Low risk       | No concerns  | Major concerns | No concerns   | No concerns | Moderate          | Imprecision               |
| Ace-K + Sucralose:Aspartame                     | 0                 | No concerns       | Low risk       | No concerns  | Major concerns | No concerns   | No concerns | Moderate          | Imprecision               |
| Ace-K + Sucralose:Saccharin                     | 0                 | No concerns       | Low risk       | No concerns  | Major concerns | No concerns   | No concerns | Moderate          | Imprecision               |
| Ace-K + Sucralose:Sucralose                     | 0                 | No concerns       | Low risk       | No concerns  | Major concerns | No concerns   | No concerns | Moderate          | Imprecision               |
| Aspartame:Saccharin                             | 0                 | No concerns       | Low risk       | No concerns  | Major concerns | No concerns   | No concerns | Moderate          | Imprecision               |
| Saccharin:Sucralose                             | 0                 | No concerns       | Low risk       | No concerns  | Major concerns | No concerns   | No concerns | Moderate          | Imprecision               |



**Table S20.** GRADE assessments of DELAYED COUPLING INTERVENTIONS examining the effect of non-nutritive sweetened beverages (NNS beverages) sweetened with individual or blends of non-nutritive sweeteners (NNS) and water on postprandial blood INSULIN response in participants with TYPE 2 DIABETES

| Treatments                    | Effect Estimate                    | GRADE Assessments |   |   |   |   |   | Overall   |
|-------------------------------|------------------------------------|-------------------|---|---|---|---|---|-----------|
|                               |                                    | 1                 | 2 | 3 | 4 | 5 | 6 |           |
| Aspartame vs. Sucralose       | -6897.480<br>(-26800.86, 13005.90) | -                 | - | ↓ | ↓ | - | - | LOW<br>⊕⊕ |
| Aspartame vs. Sucralose+Ace-K | -1254.645<br>(-33264.83, 30755.54) | -                 | - | ↓ | ↓ | - | - | LOW<br>⊕⊕ |
| Aspartame vs. Water           | 3700.840<br>(-18897.51, 26299.19)  | -                 | - | ↓ | ↓ | - | - | LOW<br>⊕⊕ |
| Sucralose vs. Sucralose+Ace-K | 5642.835<br>(-25142.04, 36427.71)  | -                 | - | ↓ | ↓ | - | - | LOW<br>⊕⊕ |
| Sucralose vs. Water           | 10598.320<br>(-10228.15, 31424.79) | -                 | - | ↓ | ↓ | - | - | LOW<br>⊕⊕ |
| Sucralose+Ace-K vs. Water     | 4955.485<br>(-17715.34, 27626.31)  | -                 | - | ↓ | ↓ | - | - | LOW<br>⊕⊕ |

Data reported as mean difference with 95% confidence intervals (CIs). Due to lack of available trial data, the CINeMA (Confidence in Network Meta-Analysis) web application was unable to make judgements for the six domains. Thus, manual judgements were made based on the CINeMA framework (27, 28). GRADE domains refer to: (1), within-study bias; (2), reporting bias; (3), indirectness; (4), imprecision; (5) heterogeneity; and (6) incoherence. The risk of bias domain was assessed using the Cochrane RoB2 tool (no downgrade if there was no concern for overall risk of bias; downgraded if there was some or major concern for overall risk of bias). Evidence was downgraded for imprecision if 95% CIs overlapped the minimally important difference of 2250 pmol\*min/L. Evidence was downgraded for indirectness due lack of available trial data. There is no general consensus on a clinically important size difference for 2-hour blood insulin incremental area under the curve (iAUC). Health Canada considers a 20% reduction in glucose iAUC to be the minimum physiologically relevant difference as per “Guideline Concerning the Safety and Physiological Effects of Novel Fibre Sources and Food Products Containing Them” (29). Extrapolating the 20% threshold in glucose iAUC, we calculated the MID of insulin iAUC by taking 20% of 11250 pmol\*mins/L which is the median of insulin iAUC in participants with type 2 diabetes (~6200 pmol\*mins/L) and healthy participants (~16300 pmol\*mins/L) after a 75-g oral glucose tolerance test (32-34). Non-significant results are grey and not bolded. Trivial (significant) effects (<1 MID) or no effects have a white background; small important effects (>1 MID) have a light blue background; moderate effects (>2 MID) have a darker blue background; large effects (>5 to <10 MID) have a purple background; very large effects (>10 MID) have a black background. Confidence in the effect estimate is shown for each treatment comparison: high confidence ⊕⊕⊕⊕; moderate confidence ⊕⊕⊕; low confidence ⊕⊕; very low confidence ⊕



**Table S21.** OVERALL CInEMA assessments of DELAYED COUPLING INTERVENTIONS examining the effect of non-nutritive sweetened beverages (NNS beverages) sweetened with individual or blends of non-nutritive sweeteners (NNS) and water on postprandial blood GLP-1 response in HEALTHY participants

| Comparison                                      | Number of studies | Within-study bias | Reporting bias | Indirectness | Imprecision    | Heterogeneity | Incoherence | Confidence rating | Reason(s) for downgrading  |
|-------------------------------------------------|-------------------|-------------------|----------------|--------------|----------------|---------------|-------------|-------------------|----------------------------|
| <b>DIRECT EVIDENCE</b>                          |                   |                   |                |              |                |               |             |                   |                            |
| Ace-K + Aspartame + Sucralose:Ace-K + Sucralose | 1                 | No concerns       | Low risk       | No concerns  | Some concerns  | Some concerns | No concerns | Low               | Imprecision, Heterogeneity |
| Ace-K + Aspartame + Sucralose:Water             | 1                 | No concerns       | Low risk       | No concerns  | Some concerns  | Some concerns | No concerns | Low               | Imprecision, Heterogeneity |
| Ace-K + Sucralose:Water                         | 2                 | No concerns       | Low risk       | No concerns  | Some concerns  | Some concerns | No concerns | Low               | Imprecision, Heterogeneity |
| Aspartame:Sucralose                             | 1                 | No concerns       | Low risk       | No concerns  | Major concerns | No concerns   | No concerns | Moderate          | Imprecision                |
| Aspartame:Water                                 | 1                 | No concerns       | Low risk       | No concerns  | Major concerns | No concerns   | No concerns | Moderate          | Imprecision                |
| Saccharin:Water                                 | 1                 | No concerns       | Low risk       | No concerns  | Major concerns | No concerns   | No concerns | Moderate          | Imprecision                |
| Sucralose:Water                                 | 3                 | No concerns       | Low risk       | No concerns  | No concerns    | Some concerns | No concerns | Moderate          | Heterogeneity              |
| <b>INDIRECT EVIDENCE</b>                        |                   |                   |                |              |                |               |             |                   |                            |
| Ace-K + Aspartame + Sucralose:Aspartame         | 0                 | No concerns       | Low risk       | No concerns  | Major concerns | No concerns   | No concerns | Moderate          | Imprecision                |
| Ace-K + Aspartame + Sucralose:Saccharin         | 0                 | No concerns       | Low risk       | No concerns  | Major concerns | No concerns   | No concerns | Moderate          | Imprecision                |
| Ace-K + Aspartame + Sucralose:Sucralose         | 0                 | No concerns       | Low risk       | No concerns  | Some concerns  | Some concerns | No concerns | Low               | Imprecision, Heterogeneity |
| Ace-K + Sucralose:Aspartame                     | 0                 | No concerns       | Low risk       | No concerns  | Major concerns | No concerns   | No concerns | Moderate          | Imprecision                |
| Ace-K + Sucralose:Saccharin                     | 0                 | No concerns       | Low risk       | No concerns  | Major concerns | No concerns   | No concerns | Moderate          | Imprecision                |
| Ace-K + Sucralose:Sucralose                     | 0                 | No concerns       | Low risk       | No concerns  | Some concerns  | Some concerns | No concerns | Low               | Imprecision, Heterogeneity |
| Aspartame:Saccharin                             | 0                 | No concerns       | Low risk       | No concerns  | Major concerns | No concerns   | No concerns | Moderate          | Imprecision                |
| Saccharin:Sucralose                             | 0                 | No concerns       | Low risk       | No concerns  | Major concerns | No concerns   | No concerns | Moderate          | Imprecision                |



**Table S22.** GRADE assessments of DELAYED COUPLING INTERVENTIONS examining the effect of non-nutritive sweetened beverages (NNS beverages) sweetened with individual or blends of non-nutritive sweeteners (NNS) and water on postprandial blood GLP-1 response in participants with TYPE 2 DIABETES

| Treatments                    | Effect Estimate                  | GRADE Assessments |   |   |   |   |   | Overall   |
|-------------------------------|----------------------------------|-------------------|---|---|---|---|---|-----------|
|                               |                                  | 1                 | 2 | 3 | 4 | 5 | 6 |           |
| Aspartame vs. Sucralose       | -483.260<br>(-1314.391, 347.871) | -                 | - | ↓ | ↓ | - | - | LOW<br>⊕⊕ |
| Aspartame vs. Sucralose+Ace-K | -332.706<br>(-1360.600, 695.188) | -                 | - | ↓ | ↓ | - | - | LOW<br>⊕⊕ |
| Aspartame vs. Water           | -156.770<br>(-1127.779, 814.239) | -                 | - | ↓ | ↓ | - | - | LOW<br>⊕⊕ |
| Sucralose vs. Sucralose+Ace-K | 150.554<br>(-790.271, 1091.379)  | -                 | - | ↓ | ↓ | - | - | LOW<br>⊕⊕ |
| Sucralose vs. Water           | 326.490<br>(-551.829, 1204.809)  | -                 | - | ↓ | ↓ | - | - | LOW<br>⊕⊕ |
| Sucralose+Ace-K vs. Water     | 175.936<br>(-161.268, 513.141)   | -                 | - | ↓ | ↓ | - | - | LOW<br>⊕⊕ |

Data reported as mean difference with 95% confidence intervals (CIs). Due to lack of available trial data, the CINeMA (Confidence in Network Meta-Analysis) web application was unable to make judgements for the six domains. Thus, manual judgements were made based on the CINeMA framework (27, 28). GRADE domains refer to: (1), within-study bias; (2), reporting bias; (3), indirectness; (4), imprecision; (5) heterogeneity; and (6) incoherence. The risk of bias domain was assessed using the Cochrane RoB2 tool (no downgrade if there was no concern for overall risk of bias; downgraded if there was some or major concern for overall risk of bias). Evidence was downgraded for imprecision if 95% CIs overlapped the minimally important difference of 82 pmol\*min/L. Evidence was downgraded for indirectness due lack of available trial data. There is no general consensus on a clinically important size difference for 2-hour blood GLP-1 incremental area under the curve (iAUC). Health Canada considers a 20% reduction in glucose iAUC to be the minimum physiologically relevant difference as per “Guideline Concerning the Safety and Physiological Effects of Novel Fibre Sources and Food Products Containing Them” (29). Extrapolating the 20% threshold in glucose iAUC, we calculated the MID of GLP-1 iAUC by taking 20% of 412 pmol\*mins/L which is the median of the difference in GLP-1 iAUC among healthy participants (~95 pmol\*mins/L) and those with type 2 diabetes (~633 pmol\*mins/L) after a glucose or meal tolerance test (30). Significant results are bolded in black. Non-significant results are grey and not bolded. Trivial (significant) effects (<1 MID) or no effects have a white background; small important effects (>1 MID) have a light blue background; moderate effects (>2 MID) have a darker blue background; large effects (>5 to <10 MID) have a purple background; very large effects (>10 MID) have a black background. Confidence in the effect estimate is shown for each treatment comparison: high confidence ⊕⊕⊕⊕; moderate confidence ⊕⊕⊕; low confidence ⊕⊕; very low confidence ⊕



**Table S23.** OVERALL CIneMA assessments of DELAYED COUPLING INTERVENTIONS examining the effect of non-nutritive sweetened beverages (NNS beverages) sweetened with individual or blends of non-nutritive sweeteners (NNS) and water on postprandial blood GIP response in HEALTHY participants

| Comparison                                      | Number of studies | Within-study bias | Reporting bias | Indirectness | Imprecision    | Heterogeneity | Incoherence | Confidence rating | Reason(s) for downgrading |
|-------------------------------------------------|-------------------|-------------------|----------------|--------------|----------------|---------------|-------------|-------------------|---------------------------|
| <b>DIRECT EVIDENCE</b>                          |                   |                   |                |              |                |               |             |                   |                           |
| Ace-K + Aspartame + Sucralose:Ace-K + Sucralose | 1                 | No concerns       | Low risk       | No concerns  | Major concerns | No concerns   | No concerns | Moderate          | Imprecision               |
| Ace-K + Aspartame + Sucralose:Water             | 1                 | No concerns       | Low risk       | No concerns  | Major concerns | No concerns   | No concerns | Moderate          | Imprecision               |
| Ace-K + Sucralose:Water                         | 2                 | No concerns       | Low risk       | No concerns  | Major concerns | No concerns   | No concerns | Moderate          | Imprecision               |
| Saccharin:Water                                 | 1                 | No concerns       | Low risk       | No concerns  | Major concerns | No concerns   | No concerns | Moderate          | Imprecision               |
| Sucralose:Water                                 | 2                 | No concerns       | Low risk       | No concerns  | Major concerns | No concerns   | No concerns | Moderate          | Imprecision               |
| <b>INDIRECT EVIDENCE</b>                        |                   |                   |                |              |                |               |             |                   |                           |
| Ace-K + Aspartame + Sucralose:Saccharin         | 0                 | No concerns       | Low risk       | No concerns  | Major concerns | No concerns   | No concerns | Moderate          | Imprecision               |
| Ace-K + Aspartame + Sucralose:Sucralose         | 0                 | No concerns       | Low risk       | No concerns  | Major concerns | No concerns   | No concerns | Moderate          | Imprecision               |
| Ace-K + Sucralose:Saccharin                     | 0                 | No concerns       | Low risk       | No concerns  | Major concerns | No concerns   | No concerns | Moderate          | Imprecision               |
| Ace-K + Sucralose:Sucralose                     | 0                 | No concerns       | Low risk       | No concerns  | Major concerns | No concerns   | No concerns | Moderate          | Imprecision               |
| Saccharin:Sucralose                             | 0                 | No concerns       | Low risk       | No concerns  | Major concerns | No concerns   | No concerns | Moderate          | Imprecision               |



**Table S24.** GRADE assessments of DELAYED COUPLING INTERVENTIONS examining the effect of non-nutritive sweetened beverages (NNS beverages) sweetened with individual or blends of non-nutritive sweeteners (NNS) and water on postprandial blood GLUCAGON response in HEALTHY participants

| Treatments                    | Effect Estimate                 | GRADE Assessments |   |   |   |   |   | Overall   |
|-------------------------------|---------------------------------|-------------------|---|---|---|---|---|-----------|
|                               |                                 | 1                 | 2 | 3 | 4 | 5 | 6 |           |
| Saccharin vs. Sucralose       | -37.122<br>(-480.123, 405.879)  | -                 | - | ↓ | ↓ | - | - | LOW<br>⊕⊕ |
| Saccharin vs. Sucralose+Ace-K | -183.248<br>(-722.058, 355.561) | -                 | - | ↓ | ↓ | - | - | LOW<br>⊕⊕ |
| Saccharin vs. Water           | 18.340<br>(-336.407, 373.087)   | -                 | - | ↓ | ↓ | - | - | LOW<br>⊕⊕ |
| Sucralose vs. Sucralose+Ace-K | -146.126<br>(-630.765, 338.512) | -                 | - | ↓ | ↓ | - | - | LOW<br>⊕⊕ |
| Sucralose vs. Water           | 55.462<br>(-209.876, 320.800)   | -                 | - | ↓ | ↓ | - | - | LOW<br>⊕⊕ |
| Sucralose+Ace-K vs. Water     | 201.588<br>(-203.961, 607.137)  | -                 | - | ↓ | ↓ | - | - | LOW<br>⊕⊕ |

Data reported as mean difference with 95% confidence intervals (CIs). Due to lack of available trial data, the CINeMA (Confidence in Network Meta-Analysis) web application was unable to make judgements for the six domains. Thus, manual judgements were made based on the CINeMA framework (27, 28). GRADE domains refer to: (1), within-study bias; (2), reporting bias; (3), indirectness; (4), imprecision; (5) heterogeneity; and (6) incoherence. The risk of bias domain was assessed using the Cochrane RoB2 tool (no downgrade if there was no concern for overall risk of bias; downgraded if there was some or major concern for overall risk of bias). Evidence was downgraded for imprecision if 95% CIs overlapped the minimally important difference of 205 pmol\*min/L. Evidence was downgraded for indirectness due lack of available trial data. There is no general consensus on a clinically important size difference for 2-hour blood glucagon incremental area under the curve (iAUC). Health Canada considers a 20% reduction in glucose iAUC to be the minimum physiologically relevant difference as per “Guideline Concerning the Safety and Physiological Effects of Novel Fibre Sources and Food Products Containing Them” (29). Extrapolating the 20% threshold in glucose iAUC, we calculated the MID of glucagon iAUC by taking 20% of 1025 pmol\*mins/L which is the median value of glucagon iAUC (water vs. glucose comparisons) in healthy individuals (~850 pmol\*mins/L) and those with type 2 diabetes (~1200 pmol\*mins/L). Significant results are bolded in black. Non-significant results are grey and not bolded. Trivial (significant) effects (<1 MID) or no effects have a white background; small important effects (>1 MID) have a light blue background; moderate effects (>2 MID) have a darker blue background; large effects (>5 to <10 MID) have a purple background; very large effects (>10 MID) have a black background. Confidence in the effect estimate is shown for each treatment comparison: high confidence ⊕⊕⊕⊕; moderate confidence ⊕⊕⊕; low confidence ⊕⊕; very low confidence ⊕



**Table S25. GRADE assessments for outcomes with single direct trial comparisons**

| Outcome                                                                                                                      | Population       | Treatments                   | Effect Estimate                | GRADE Assessments |   |   |   |   |         |
|------------------------------------------------------------------------------------------------------------------------------|------------------|------------------------------|--------------------------------|-------------------|---|---|---|---|---------|
|                                                                                                                              |                  |                              |                                | 1                 | 2 | 3 | 4 | 5 | Overall |
| Uncoupling interventions<br>(Beverages were consumed without added energy or nutrients)                                      |                  |                              |                                |                   |   |   |   |   |         |
| Glucose<br>(mmol*min/L)                                                                                                      | IGT<br>(N=20)    | Aspartame vs.<br>Glucose     | 357.7<br>[-25.1, 740.4]        | -                 | ↓ | - | ↓ | - | ⊕⊕ LOW  |
| Insulin<br>(pmol*min/L)                                                                                                      | IGT<br>(N=20)    | Aspartame vs.<br>Glucose     | 25335.8<br>[-13636.3, 64307.7] | -                 | ↓ | - | ↓ | - | ⊕⊕ LOW  |
| PYY<br>(pmol*min/L)                                                                                                          | Healthy<br>(N=8) | Sucralose vs.<br>Water       | 0.1<br>[-442.8, 442.8]         | -                 | ↓ | - | ↓ | - | ⊕⊕ LOW  |
| Delayed coupling interventions<br>(Beverages were consumed as a preload prior to added energy and nutrients as carbohydrate) |                  |                              |                                |                   |   |   |   |   |         |
| Glucose<br>(mmol*min/L)                                                                                                      | PLWO<br>(N=11)   | Sucralose vs.<br>Water       | -30.0<br>[-87.3, 27.3]         | -                 | ↓ | - | ↓ | - | ⊕⊕ LOW  |
|                                                                                                                              | T1D<br>(N=9)     | Ace-K+Sucralose<br>vs. Water | -64.0<br>[-233.1, 105.3]       | -                 | ↓ | - | ↓ | - | ⊕⊕ LOW  |
| Insulin<br>(pmol*min/L)                                                                                                      | PLWO<br>(N=11)   | Sucralose vs.<br>Water       | -8200.0<br>[-31642.4, 15242.4] | -                 | ↓ | - | ↓ | - | ⊕⊕ LOW  |
|                                                                                                                              | T1D<br>(N=9)     | Ace-K+Sucralose<br>vs. Water | -543.9<br>[-1779.2, 691.5]     | -                 | ↓ | - | ↓ | - | ⊕⊕ LOW  |
| GLP-1<br>(pmol*min/L)                                                                                                        | T1D<br>(N=9)     | Ace-K+Sucralose<br>vs. Water | -433.5<br>[-1134.4, 267.5]     | -                 | ↓ | - | ↓ | - | ⊕⊕ LOW  |
| GIP<br>(pmol*min/L)                                                                                                          | T1D<br>(N=9)     | Ace-K+Sucralose<br>vs. Water | -934.8<br>[-2215.7, 346.1]     | -                 | ↓ | - | ↓ | - | ⊕⊕ LOW  |
|                                                                                                                              | T2D<br>(N=9)     | Ace-K+Sucralose<br>vs. Water | -479.8<br>[-2181.5, 1222.1]    | -                 | ↓ | - | ↓ | - | ⊕⊕ LOW  |
| Glucagon<br>(pmol*min/L)                                                                                                     | T1D<br>(N=9)     | Ace-K+Sucralose<br>vs. Water | -20.3<br>[-97.4, 46.8]         | -                 | ↓ | - | ↓ | - | ⊕⊕ LOW  |
|                                                                                                                              | T2D<br>(N=10)    | Ace-K+Sucralose<br>vs. Water | 241.9<br>[-38.8, 522.5]        | -                 | ↓ | - | ↓ | - | ⊕⊕ LOW  |

Data reported as mean difference with 95% confidence intervals (CIs). Due to lack of available trials, the CINeMA (Confidence in Network Meta-Analysis) web application could not be utilized. Confidence in the effect estimates were assessed using the traditional GRADE (Grading of Recommendations, Assessment, Development and Evaluations) approach (35). GRADE domains refer to: (1), risk of bias; (2), imprecision; (3), inconsistency; (4), indirectness; and (5), publication bias. The following minimally important differences (MID) were utilized: glucose (100 mmol\*min/L), insulin (2250 pmol\*mins/L), GLP-1 (82 pmol\*mins/L), GIP (94 pmol\*mins/L), glucagon (205 pmol\*mins/L) and PYY (200 pmol\*mins/L). The risk of bias domain was assessed using the Cochrane RoB2 tool (no downgrade if there was no concern for overall risk of bias; downgraded if there was some or major concern for overall risk of bias). Evidence was double downgraded for imprecision due to availability of only a single trial. Inconsistency and publication bias could not be assessed due to limited trial data and thus, no downgrades were applied. ↓ downgrade; “-”, no downgrade. IGT, impaired glucose tolerance; PLWO, participants living with obesity; T1D, type 1 diabetes; T2D, type 2 diabetes. 2



**Figure S1.** Formulas used to compute incremental area under the curve (iAUC) for primary and secondary outcomes

**Incremental area under the curve (iAUC)**

$$iAUC = \frac{(A + B) \times t}{2} + \frac{(B + C) \times t}{2} + \frac{(C + D) \times t}{2} + \frac{(D + E) \times t}{2} \text{ etc ...}$$

**Standard error (SE) computation for iAUC**

$$SE \text{ of } iAUC = \sqrt{t^2 + \text{average } SE^2}$$

The iAUC for glucose and insulin was calculated geometrically using the trapezoid rule (36) where A, B, C, D, and E represent positive glucose and insulin increments, and t is the time interval between blood samples. The standard error of the iAUC was computed using the propagation of error approach for area (37). t represents the duration of follow-up and average SE is the average of the SE at individual time points on the glucose and insulin curves.



**Figure S2. Flow of literature**

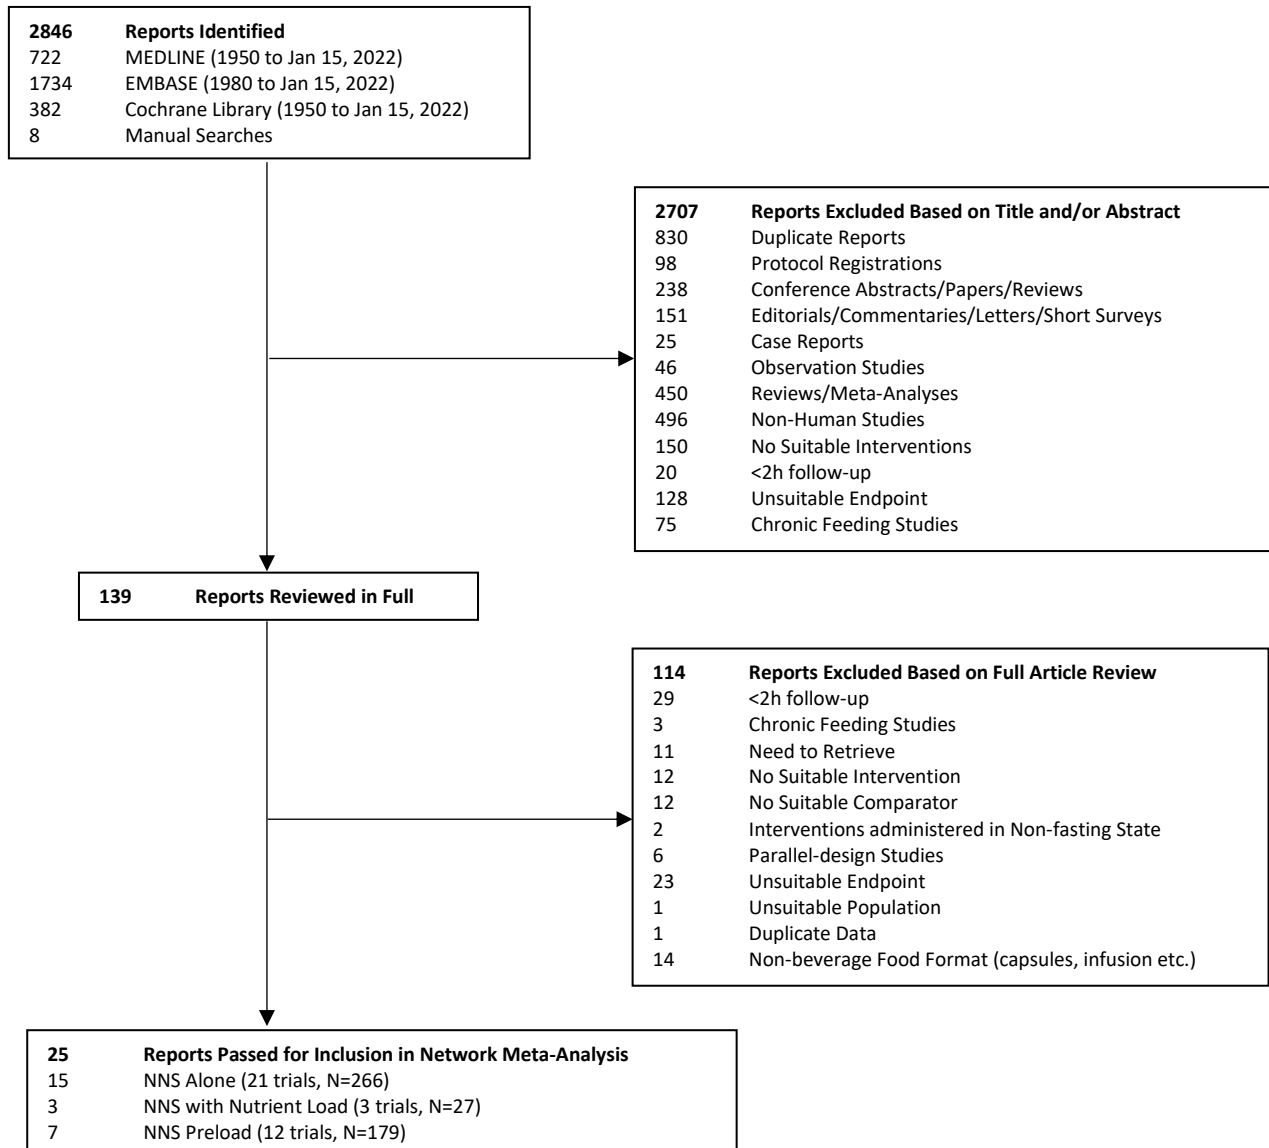



**Figure S3.** Individual (top) and summary (bottom) risk of bias assessments of studies with UNCOUPLING INTERVENTIONS

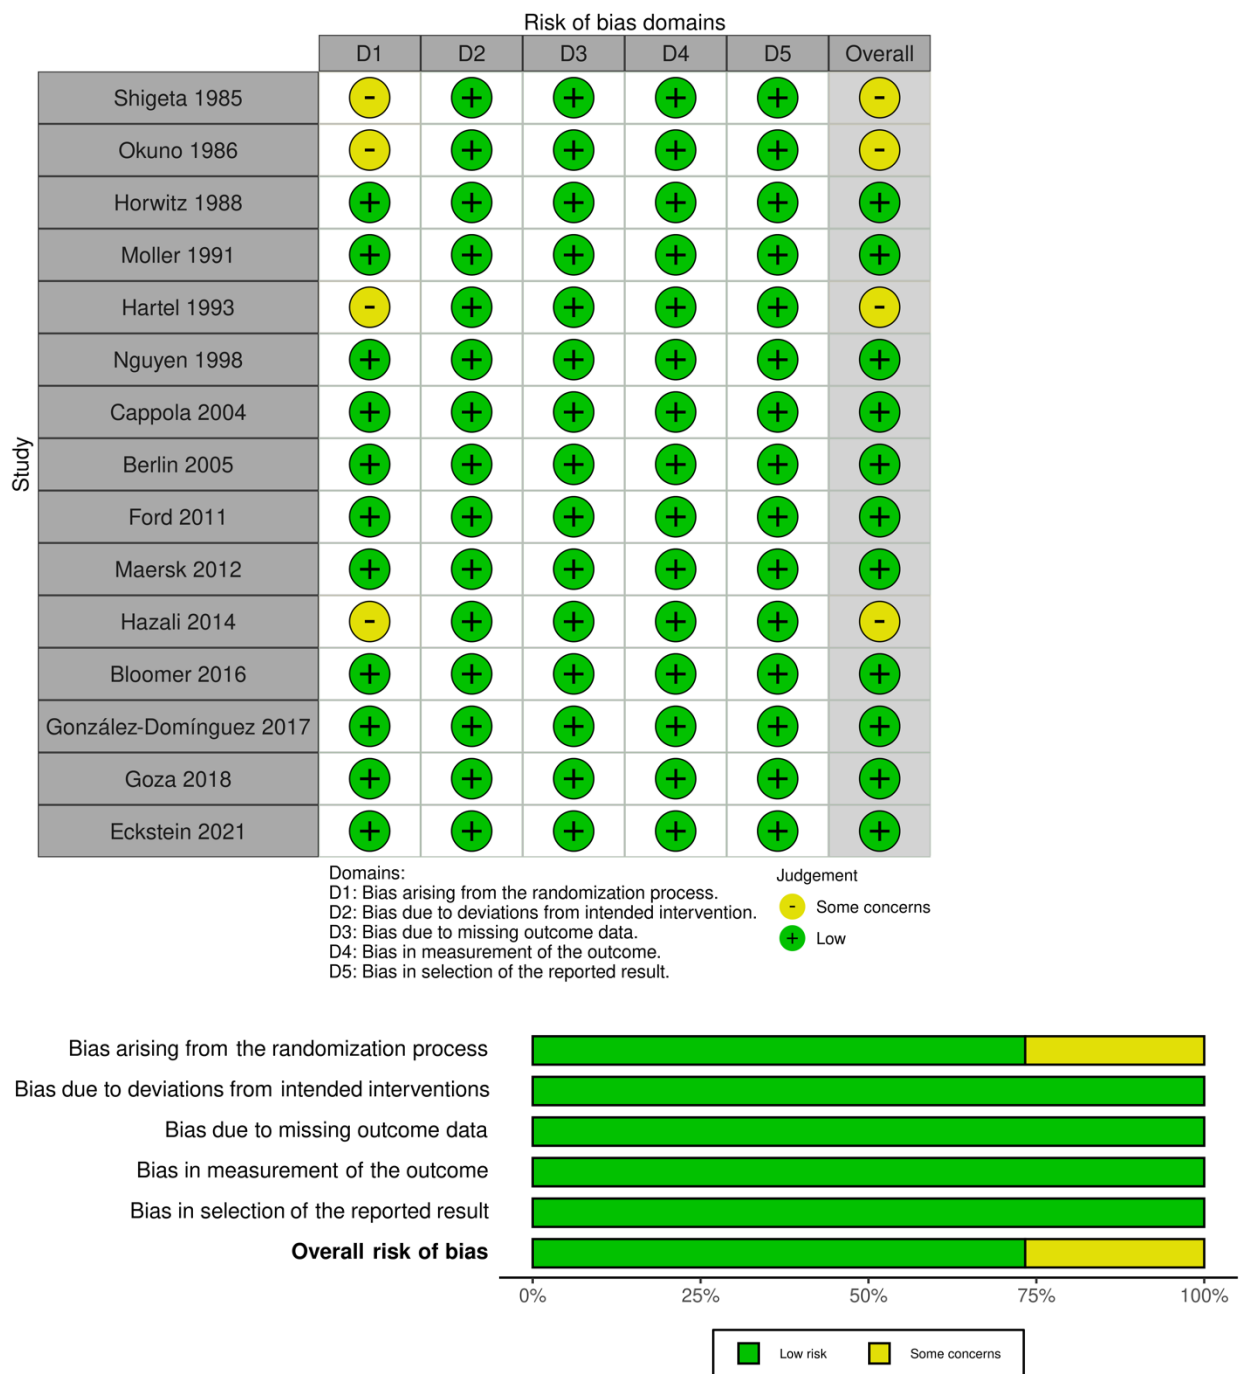



**Figure S4.** Individual (top) and summary (bottom) risk of bias assessment of studies with COUPLING INTERVENTIONS

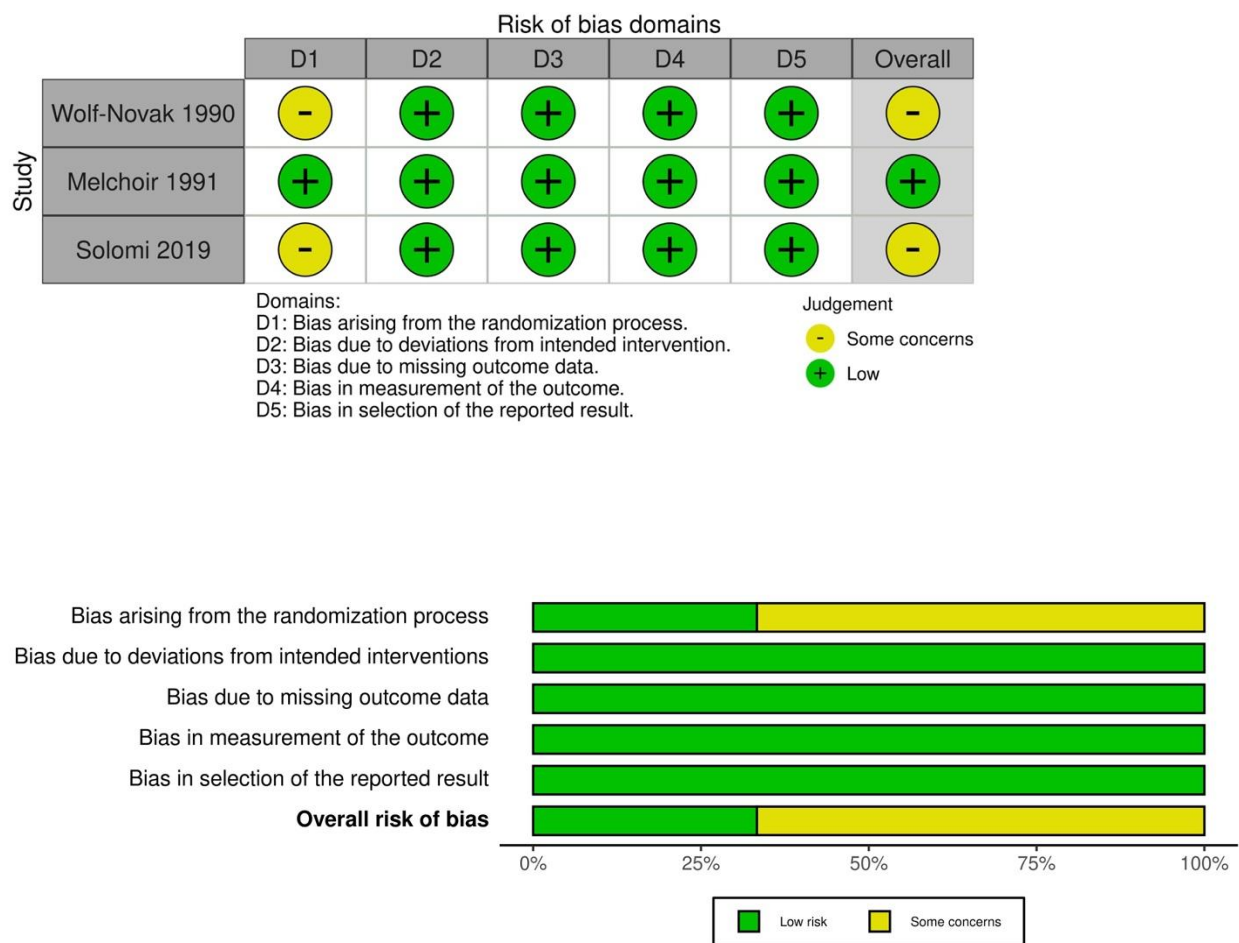



**Figure S5.** Individual (top) and summary (bottom) risk of bias assessment of studies with DELAYED COUPLING INTERVENTIONS

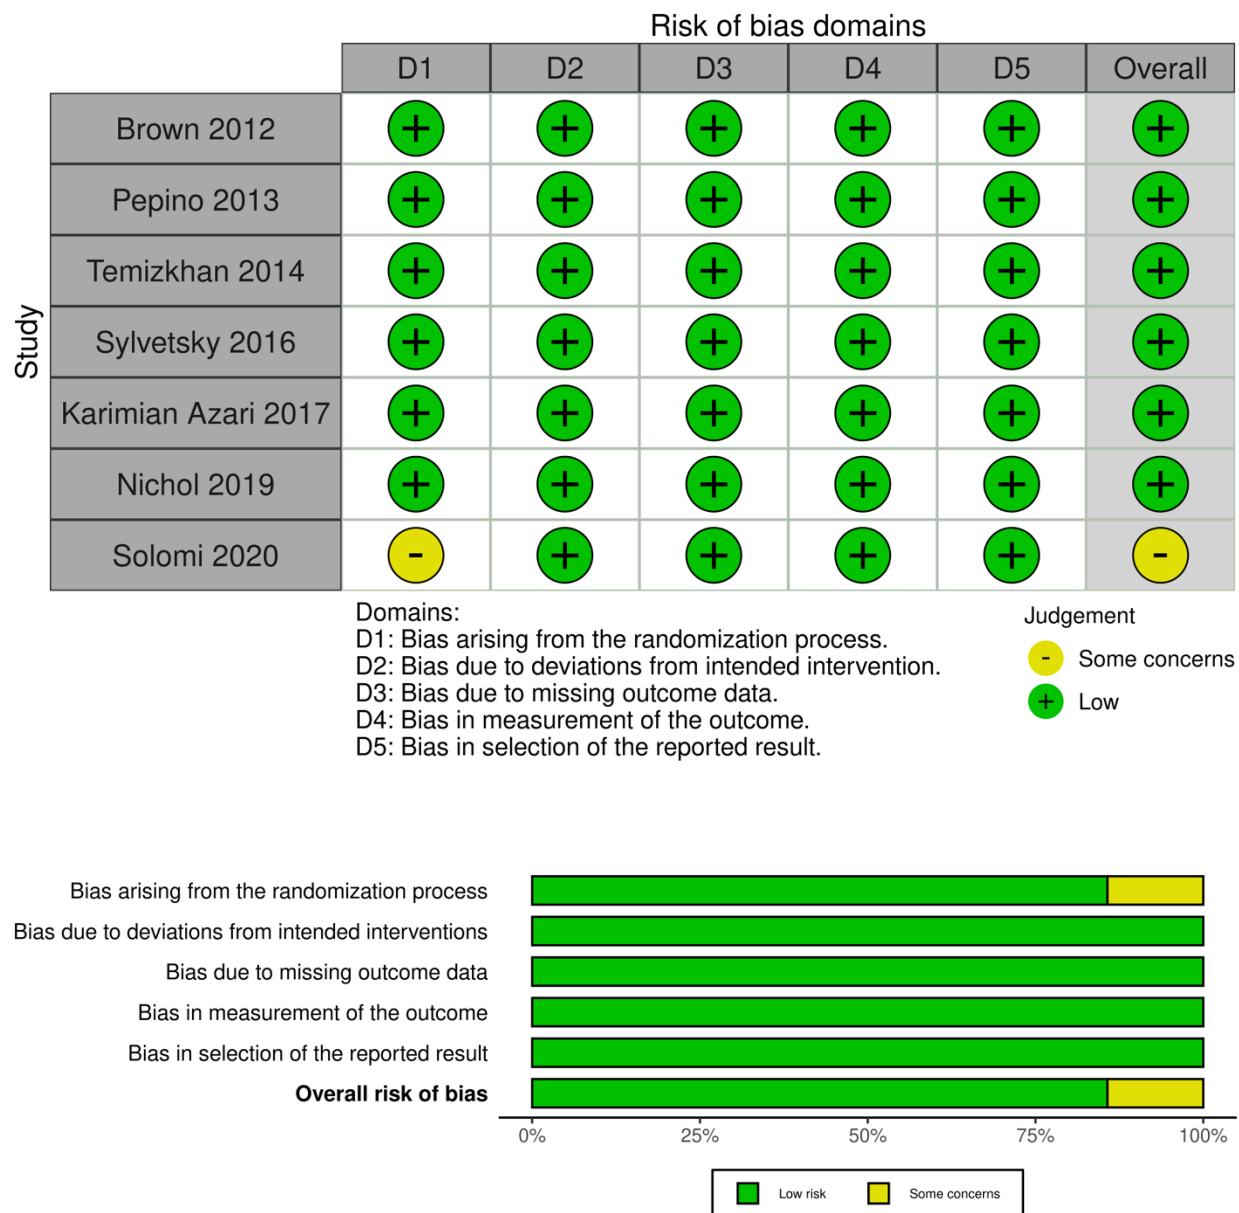



**Figure S6.** Risk of bias assessment of UNCOUPLING INTERVENTIONS examining non-nutritive sweetened beverages (NNS beverages) sweetened with individual or blends of non-nutritive sweeteners (NNS), water, and sugar-sweetened beverages (SSBs) sweetened with caloric sweeteners on postprandial blood GLUCOSE response in HEALTHY participants

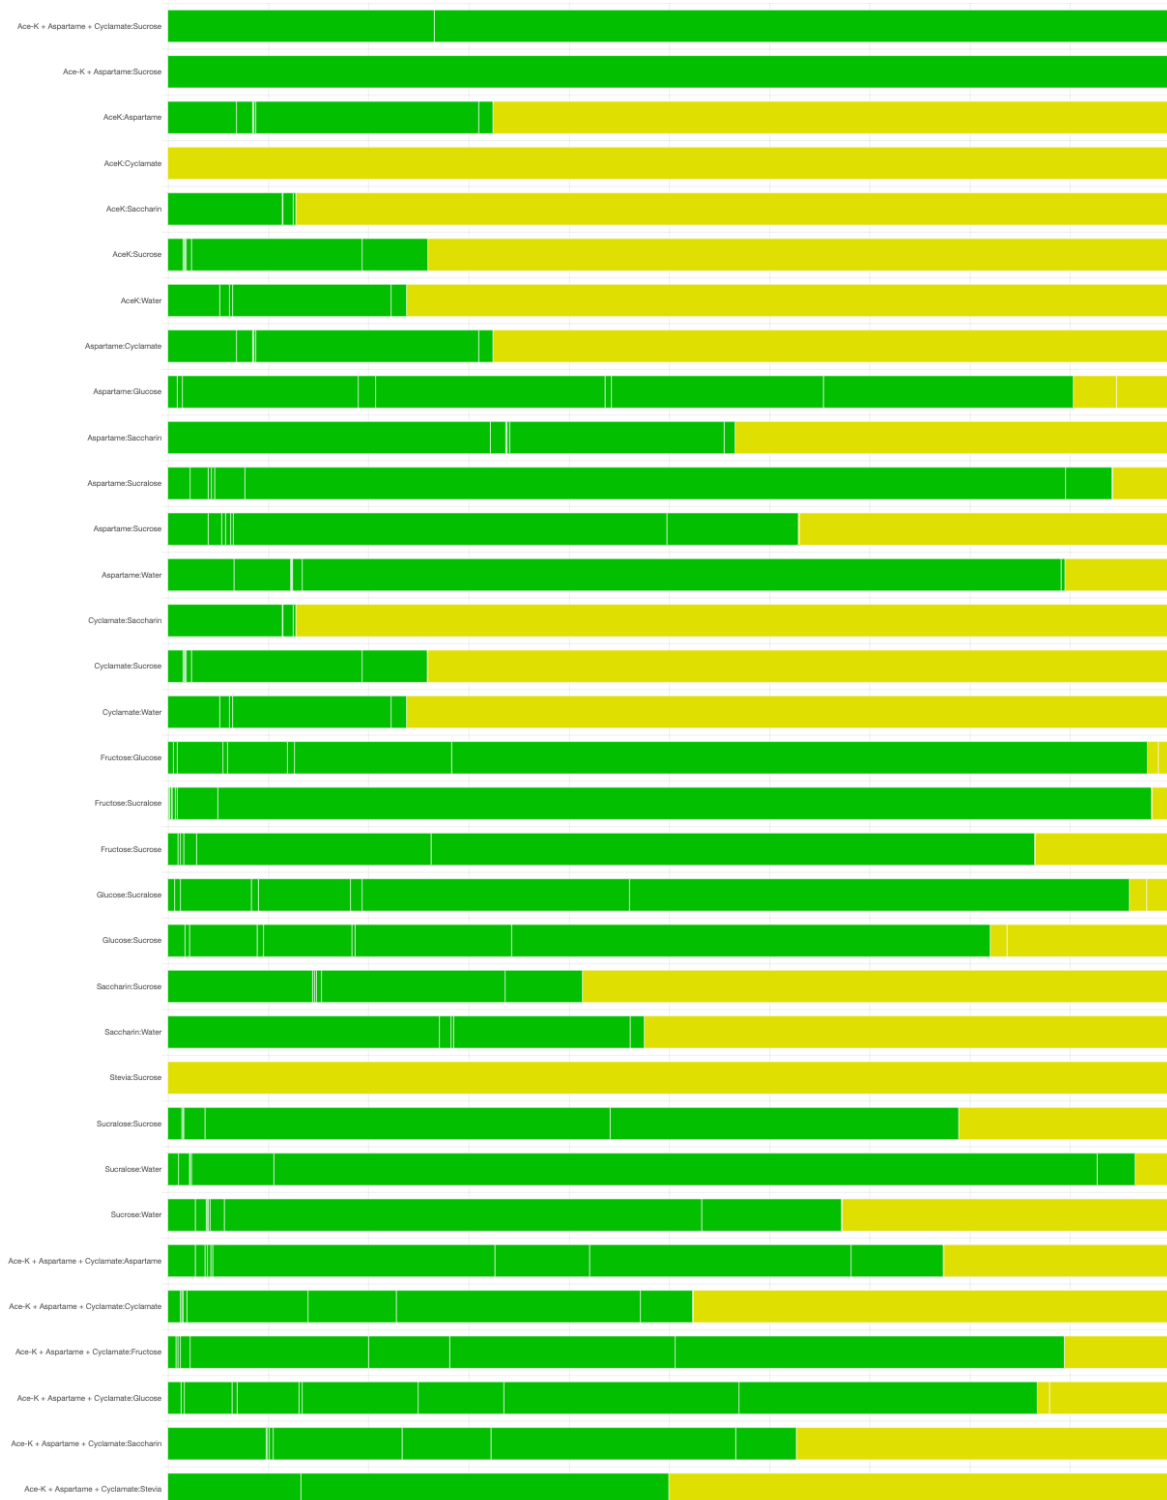



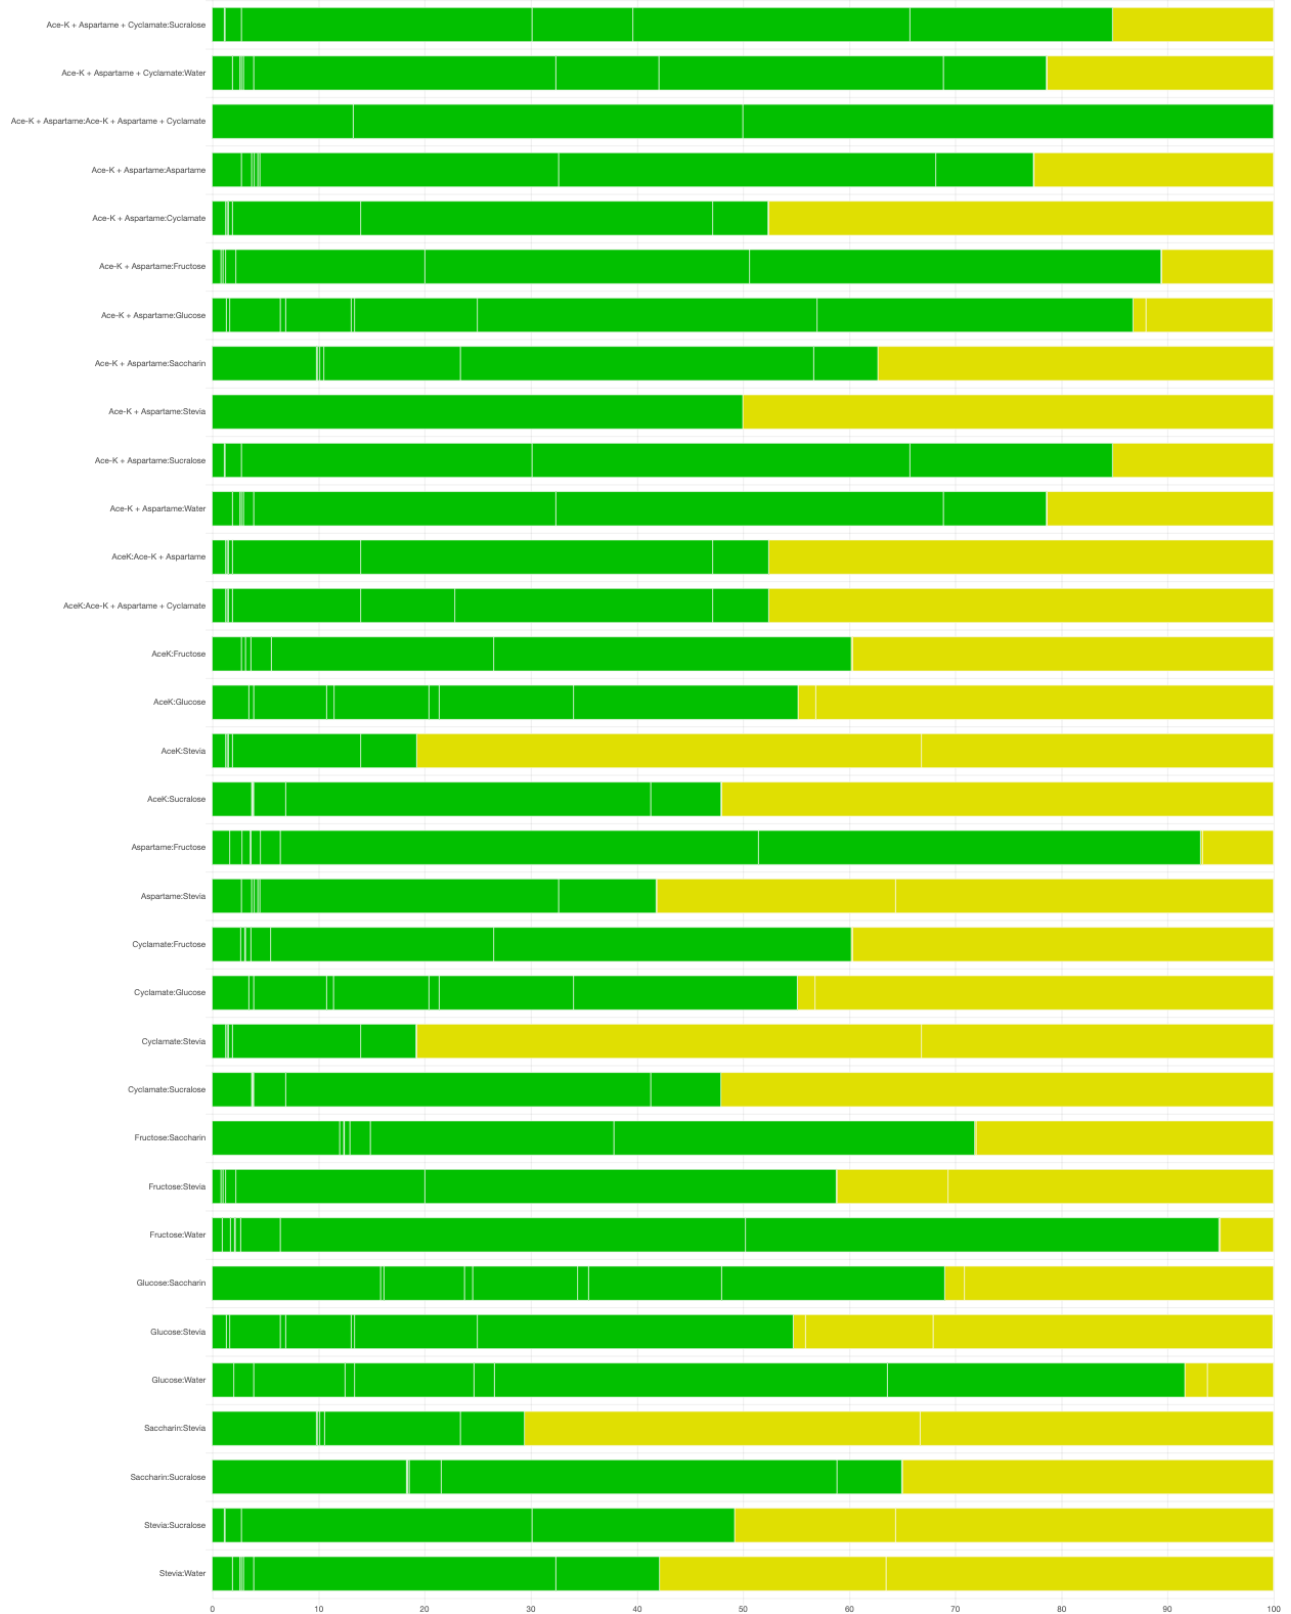

Green = no concerns; yellow = some concerns; red = major concerns



**Figure S7.** CINeMA output for the IMPRECISION domain of UNCOUPLING INTERVENTIONS examining non-nutritive sweetened beverages (NNS beverages) sweetened with individual or blends of non-nutritive sweeteners (NNS), water, and sugar-sweetened beverages (SSBs) sweetened with caloric sweeteners on postprandial blood GLUCOSE response in HEALTHY participants

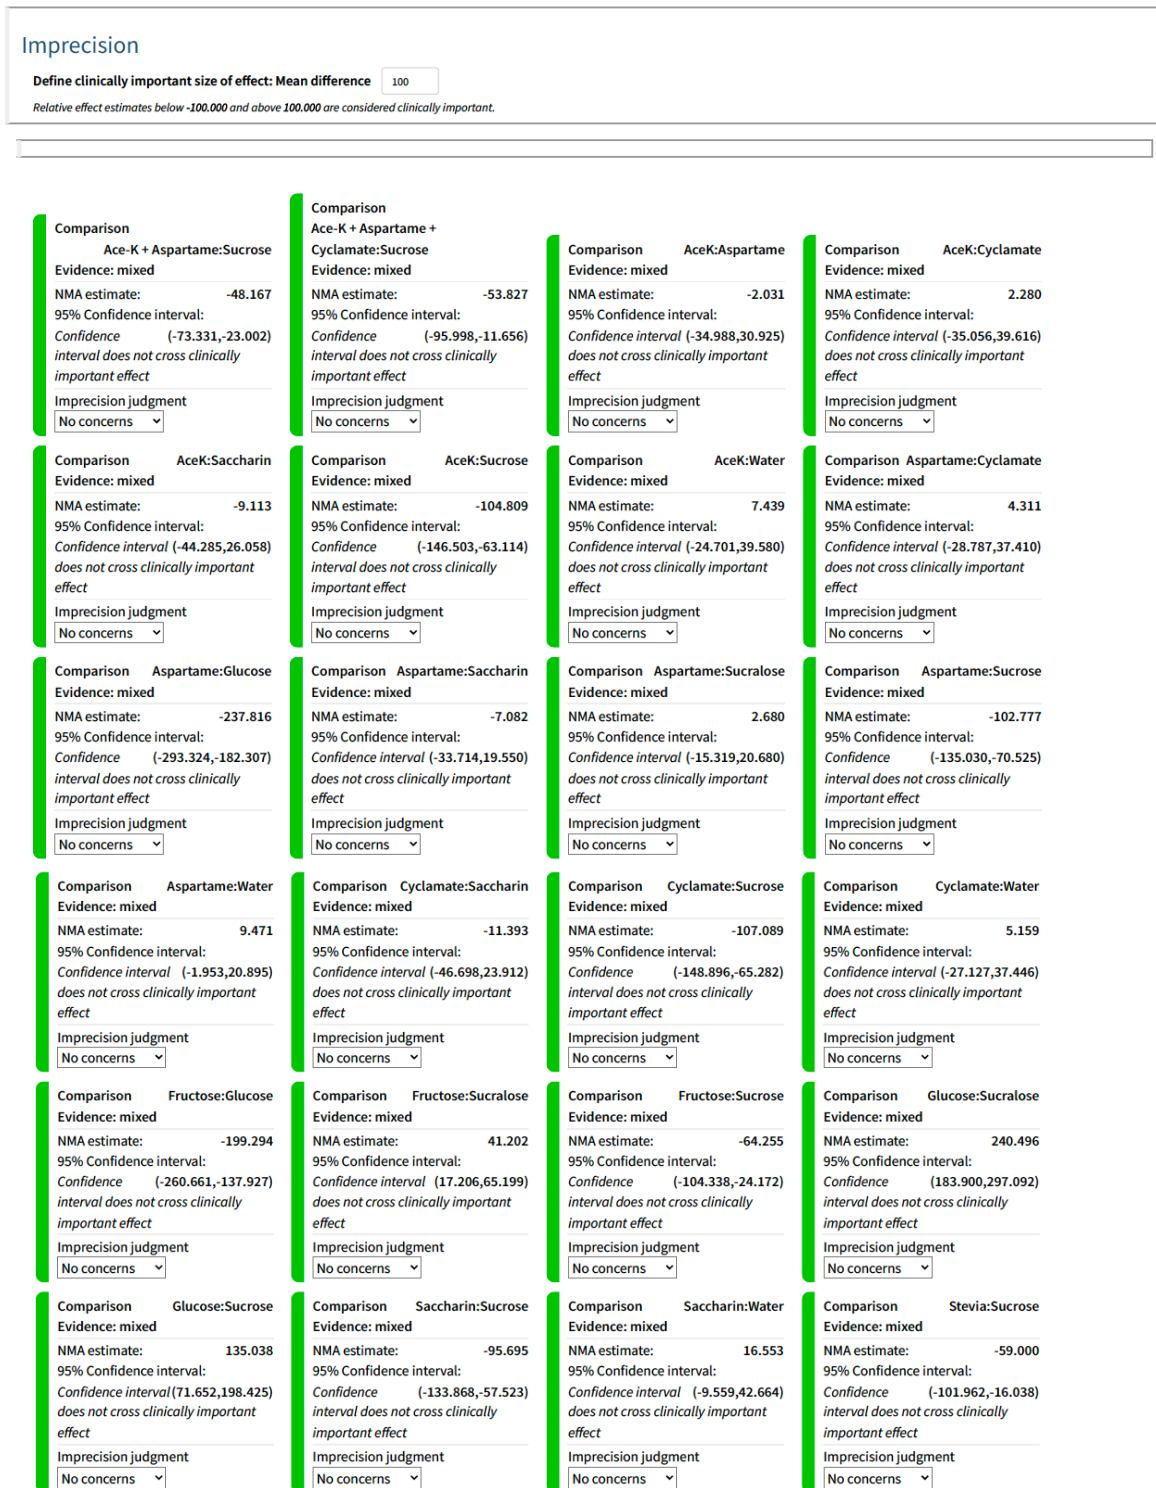



|                                                                                                                                                                                                                                                                                    |                                                                                                                                                                                                                                                                                               |                                                                                                                                                                                                                                                                                    |                                                                                                                                                                                                                                                                                          |
|------------------------------------------------------------------------------------------------------------------------------------------------------------------------------------------------------------------------------------------------------------------------------------|-----------------------------------------------------------------------------------------------------------------------------------------------------------------------------------------------------------------------------------------------------------------------------------------------|------------------------------------------------------------------------------------------------------------------------------------------------------------------------------------------------------------------------------------------------------------------------------------|------------------------------------------------------------------------------------------------------------------------------------------------------------------------------------------------------------------------------------------------------------------------------------------|
| <p>Comparison<br/>Sucralose:Sucrose<br/>Evidence: mixed</p> <p>NMA estimate: -105.458<br/>95% Confidence interval:<br/>Confidence interval (-137.729,-73.186)<br/>interval does not cross clinically important effect</p> <p>Imprecision judgment<br/>No concerns</p>              | <p>Comparison<br/>Sucralose:Water<br/>Evidence: mixed</p> <p>NMA estimate: 6.790<br/>95% Confidence interval:<br/>Confidence interval (-7.610,21.191)<br/>does not cross clinically important effect</p> <p>Imprecision judgment<br/>No concerns</p>                                          | <p>Comparison<br/>Sucrose:Water<br/>Evidence: mixed</p> <p>NMA estimate: 112.248<br/>95% Confidence interval:<br/>Confidence interval (81.526,142.970)<br/>does not cross clinically important effect</p> <p>Imprecision judgment<br/>No concerns</p>                              | <p>Comparison<br/>Ace-K + Aspartame:Ace-K + Aspartame + Cyclamate<br/>Evidence: indirect</p> <p>NMA estimate: 5.660<br/>95% Confidence interval:<br/>Confidence interval (-43.448,54.769)<br/>does not cross clinically important effect</p> <p>Imprecision judgment<br/>No concerns</p> |
| <p>Comparison<br/>Evidence: Ace-K:Ace-K + Aspartame indirect</p> <p>NMA estimate: -56.642<br/>95% Confidence interval:<br/>Confidence interval (-105.342,-7.942)<br/>interval does not cross clinically important effect</p> <p>Imprecision judgment<br/>No concerns</p>           | <p>Comparison<br/>Ace-K + Aspartame:Aspartame<br/>Evidence: indirect</p> <p>NMA estimate: 54.611<br/>95% Confidence interval:<br/>Confidence interval (13.703,95.519)<br/>does not cross clinically important effect</p> <p>Imprecision judgment<br/>No concerns</p>                          | <p>Comparison<br/>Ace-K + Aspartame:Cyclamate<br/>Evidence: indirect</p> <p>NMA estimate: 58.922<br/>95% Confidence interval:<br/>Confidence interval (10.126,107.718)<br/>does not cross clinically important effect</p> <p>Imprecision judgment<br/>No concerns</p>              | <p>Comparison<br/>Ace-K + Aspartame:Fructose<br/>Evidence: indirect</p> <p>NMA estimate: 16.089<br/>95% Confidence interval:<br/>Confidence interval (-31.239,63.416)<br/>does not cross clinically important effect</p> <p>Imprecision judgment<br/>No concerns</p>                     |
| <p>Comparison<br/>Ace-K + Aspartame:Glucose<br/>Evidence: indirect</p> <p>NMA estimate: -183.205<br/>95% Confidence interval:<br/>Confidence interval (-251.404,-115.007)<br/>interval does not cross clinically important effect</p> <p>Imprecision judgment<br/>No concerns</p>  | <p>Comparison<br/>Ace-K + Aspartame:Saccharin<br/>Evidence: indirect</p> <p>NMA estimate: 47.529<br/>95% Confidence interval:<br/>Confidence interval (1.808,93.249)<br/>does not cross clinically important effect</p> <p>Imprecision judgment<br/>No concerns</p>                           | <p>Comparison<br/>Evidence: Ace-K + Aspartame:Stevia indirect</p> <p>NMA estimate: 10.833<br/>95% Confidence interval:<br/>Confidence interval (-38.956,60.623)<br/>does not cross clinically important effect</p> <p>Imprecision judgment<br/>No concerns</p>                     | <p>Comparison<br/>Ace-K + Aspartame:Sucralose<br/>Evidence: indirect</p> <p>NMA estimate: 57.291<br/>95% Confidence interval:<br/>Confidence interval (16.368,98.214)<br/>does not cross clinically important effect</p> <p>Imprecision judgment<br/>No concerns</p>                     |
| <p>Comparison<br/>Evidence: Ace-K + Aspartame:Water indirect</p> <p>NMA estimate: 64.081<br/>95% Confidence interval:<br/>Confidence interval (24.369,103.794)<br/>does not cross clinically important effect</p> <p>Imprecision judgment<br/>No concerns</p>                      | <p>Comparison<br/>Ace-K:Ace-K + Aspartame + Cyclamate<br/>Evidence: indirect</p> <p>NMA estimate: -50.982<br/>95% Confidence interval:<br/>Confidence interval (-110.284,8.321)<br/>extends into clinically important effects</p> <p>Imprecision judgment<br/>Some concerns</p>               | <p>Comparison<br/>Ace-K + Aspartame + Cyclamate:Aspartame<br/>Evidence: indirect</p> <p>NMA estimate: 48.950<br/>95% Confidence interval:<br/>Confidence interval (-4.141,102.041)<br/>extends into clinically important effects</p> <p>Imprecision judgment<br/>Some concerns</p> | <p>Comparison<br/>Ace-K + Aspartame + Cyclamate:Cyclamate<br/>Evidence: indirect</p> <p>NMA estimate: 53.262<br/>95% Confidence interval:<br/>Confidence interval (-6.120,112.643)<br/>extends into clinically important effects</p> <p>Imprecision judgment<br/>Some concerns</p>       |
| <p>Comparison<br/>Ace-K + Aspartame + Cyclamate:Fructose<br/>Evidence: indirect</p> <p>NMA estimate: 10.428<br/>95% Confidence interval:<br/>Confidence interval (-47.753,68.609)<br/>does not cross clinically important effect</p> <p>Imprecision judgment<br/>No concerns</p>   | <p>Comparison<br/>Ace-K + Aspartame + Cyclamate:Glucose<br/>Evidence: indirect</p> <p>NMA estimate: -188.866<br/>95% Confidence interval:<br/>Confidence interval (-264.998,-112.733)<br/>interval does not cross clinically important effect</p> <p>Imprecision judgment<br/>No concerns</p> | <p>Comparison<br/>Ace-K + Aspartame + Cyclamate:Saccharin<br/>Evidence: indirect</p> <p>NMA estimate: 41.868<br/>95% Confidence interval:<br/>Confidence interval (-15.013,98.750)<br/>does not cross clinically important effect</p> <p>Imprecision judgment<br/>No concerns</p>  | <p>Comparison<br/>Ace-K + Aspartame + Cyclamate:Stevia<br/>Evidence: indirect</p> <p>NMA estimate: 5.173<br/>95% Confidence interval:<br/>Confidence interval (-55.028,65.373)<br/>does not cross clinically important effect</p> <p>Imprecision judgment<br/>No concerns</p>            |
| <p>Comparison<br/>Ace-K + Aspartame + Cyclamate:Sucralose<br/>Evidence: indirect</p> <p>NMA estimate: 51.630<br/>95% Confidence interval:<br/>Confidence interval (-1.472,104.733)<br/>extends into clinically important effects</p> <p>Imprecision judgment<br/>Some concerns</p> | <p>Comparison<br/>Ace-K + Aspartame + Cyclamate:Water<br/>Evidence: indirect</p> <p>NMA estimate: 58.421<br/>95% Confidence interval:<br/>Confidence interval (6.246,110.596)<br/>does not cross clinically important effect</p> <p>Imprecision judgment<br/>No concerns</p>                  | <p>Comparison<br/>Ace-K:Fructose<br/>Evidence: indirect</p> <p>NMA estimate: -40.553<br/>95% Confidence interval:<br/>Confidence interval (-82.931,1.824)<br/>does not cross clinically important effect</p> <p>Imprecision judgment<br/>No concerns</p>                           | <p>Comparison<br/>Ace-K:Glucose<br/>Evidence: indirect</p> <p>NMA estimate: -239.847<br/>95% Confidence interval:<br/>Confidence interval (-303.945,-175.749)<br/>interval does not cross clinically important effect</p> <p>Imprecision judgment<br/>No concerns</p>                    |



|                                                                                                                                                                                                                                                    |                                                                                                                                                                                                                                                          |                                                                                                                                                                                                                                                       |                                                                                                                                                                                                                                                       |
|----------------------------------------------------------------------------------------------------------------------------------------------------------------------------------------------------------------------------------------------------|----------------------------------------------------------------------------------------------------------------------------------------------------------------------------------------------------------------------------------------------------------|-------------------------------------------------------------------------------------------------------------------------------------------------------------------------------------------------------------------------------------------------------|-------------------------------------------------------------------------------------------------------------------------------------------------------------------------------------------------------------------------------------------------------|
| <b>Comparison</b> AceK:Stevia<br><b>Evidence:</b> indirect<br>NMA estimate: -45.809<br>95% Confidence interval: (-105.676,14.059)<br><i>interval extends into clinically important effects</i><br><b>Imprecision judgment</b><br>Some concerns ▼   | <b>Comparison</b> AceK:Sucralose<br><b>Evidence:</b> indirect<br>NMA estimate: 0.649<br>95% Confidence interval: (-34.325,35.623)<br><i>does not cross clinically important effect</i><br><b>Imprecision judgment</b><br>No concerns ▼                   | <b>Comparison</b> Aspartame:Fructose<br><b>Evidence:</b> indirect<br>NMA estimate: -38.522<br>95% Confidence interval: (-68.479,-8.565)<br><i>does not cross clinically important effect</i><br><b>Imprecision judgment</b><br>No concerns ▼          | <b>Comparison</b> Aspartame:Stevia<br><b>Evidence:</b> indirect<br>NMA estimate: -43.777<br>95% Confidence interval: (-97.498,9.944)<br><i>does not cross clinically important effect</i><br><b>Imprecision judgment</b><br>No concerns ▼             |
| <b>Comparison</b> Cyclamate:Fructose<br><b>Evidence:</b> indirect<br>NMA estimate: -42.833<br>95% Confidence interval: (-85.321,-0.345)<br><i>does not cross clinically important effect</i><br><b>Imprecision judgment</b><br>No concerns ▼       | <b>Comparison</b> Cyclamate:Glucose<br><b>Evidence:</b> indirect<br>NMA estimate: -242.127<br>95% Confidence interval: (-306.299,-177.956)<br><i>interval does not cross clinically important effect</i><br><b>Imprecision judgment</b><br>No concerns ▼ | <b>Comparison</b> Cyclamate:Stevia<br><b>Evidence:</b> indirect<br>NMA estimate: -48.089<br>95% Confidence interval: (-108.035,11.857)<br><i>interval extends into clinically important effects</i><br><b>Imprecision judgment</b><br>Some concerns ▼ | <b>Comparison</b> Cyclamate:Sucralose<br><b>Evidence:</b> indirect<br>NMA estimate: -1.631<br>95% Confidence interval: (-36.739,33.477)<br><i>does not cross clinically important effect</i><br><b>Imprecision judgment</b><br>No concerns ▼          |
| <b>Comparison</b> Fructose:Saccharin<br><b>Evidence:</b> indirect<br>NMA estimate: 31.440<br>95% Confidence interval: (-6.609,69.490)<br><i>does not cross clinically important effect</i><br><b>Imprecision judgment</b><br>No concerns ▼         | <b>Comparison</b> Fructose:Stevia<br><b>Evidence:</b> indirect<br>NMA estimate: -5.255<br>95% Confidence interval: (-64.012,53.502)<br><i>does not cross clinically important effect</i><br><b>Imprecision judgment</b><br>No concerns ▼                 | <b>Comparison</b> Fructose:Water<br><b>Evidence:</b> indirect<br>NMA estimate: 47.993<br>95% Confidence interval: (20.043,75.943)<br><i>does not cross clinically important effect</i><br><b>Imprecision judgment</b><br>No concerns ▼                | <b>Comparison</b> Glucose:Saccharin<br><b>Evidence:</b> indirect<br>NMA estimate: 230.734<br>95% Confidence interval: (169.572,291.896)<br><i>interval does not cross clinically important effect</i><br><b>Imprecision judgment</b><br>No concerns ▼ |
| <b>Comparison</b> Glucose:Stevia<br><b>Evidence:</b> indirect<br>NMA estimate: 194.038<br>95% Confidence interval: (117.465,270.612)<br><i>interval does not cross clinically important effect</i><br><b>Imprecision judgment</b><br>No concerns ▼ | <b>Comparison</b> Glucose:Water<br><b>Evidence:</b> indirect<br>NMA estimate: 247.287<br>95% Confidence interval: (191.300,303.273)<br><i>interval does not cross clinically important effect</i><br><b>Imprecision judgment</b><br>No concerns ▼        | <b>Comparison</b> Saccharin:Stevia<br><b>Evidence:</b> indirect<br>NMA estimate: -36.696<br>95% Confidence interval: (-94.166,20.775)<br><i>does not cross clinically important effect</i><br><b>Imprecision judgment</b><br>No concerns ▼            | <b>Comparison</b> Saccharin:Sucralose<br><b>Evidence:</b> indirect<br>NMA estimate: 9.762<br>95% Confidence interval: (-19.815,39.340)<br><i>does not cross clinically important effect</i><br><b>Imprecision judgment</b><br>No concerns ▼           |
| <b>Comparison</b> Stevia:Sucralose<br><b>Evidence:</b> indirect<br>NMA estimate: 46.458<br>95% Confidence interval: (-7.275,100.190)<br><i>extends into clinically important effects</i><br><b>Imprecision judgment</b><br>Some concerns ▼         | <b>Comparison</b> Stevia:Water<br><b>Evidence:</b> indirect<br>NMA estimate: 53.248<br>95% Confidence interval: (0.432,106.064)<br><i>does not cross clinically important effect</i><br><b>Imprecision judgment</b><br>No concerns ▼                     |                                                                                                                                                                                                                                                       |                                                                                                                                                                                                                                                       |

Relative effect estimates below -100.0 and above 100.0 mmol\*min/L (minimal important difference; MID) were considered clinically important. Judgements for IMPRECISION were assigned by the CiNEMA algorithm (27, 28). There is no general consensus on a clinically important size difference for 2-hour blood glucose incremental area under the curve (iAUC). Health Canada considers a 20% reduction in glucose iAUC to be the minimum physiologically relevant difference as per “Guideline Concerning the Safety and Physiological Effects of Novel Fibre Sources and Food Products Containing Them” (29). Thus, we calculated the MID of glucose iAUC by taking 20% of 500 mmol\*mins/L which is the median of glucose iAUC in healthy participants (~300 mmol\*mins/L) and those with type 2 diabetes (~700 mmol\*mins/L) after a 75-g oral glucose tolerance test (32-34).



**Figure S8.** CINeMA output for the HETEROGENEITY domain of UNCOUPLING INTERVENTIONS examining non-nutritive sweetened beverages (NNS beverages) sweetened with individual or blends of non-nutritive sweeteners (NNS), water, and sugar-sweetened beverages (SSBs) sweetened with caloric sweeteners on postprandial blood GLUCOSE response in HEALTHY participants

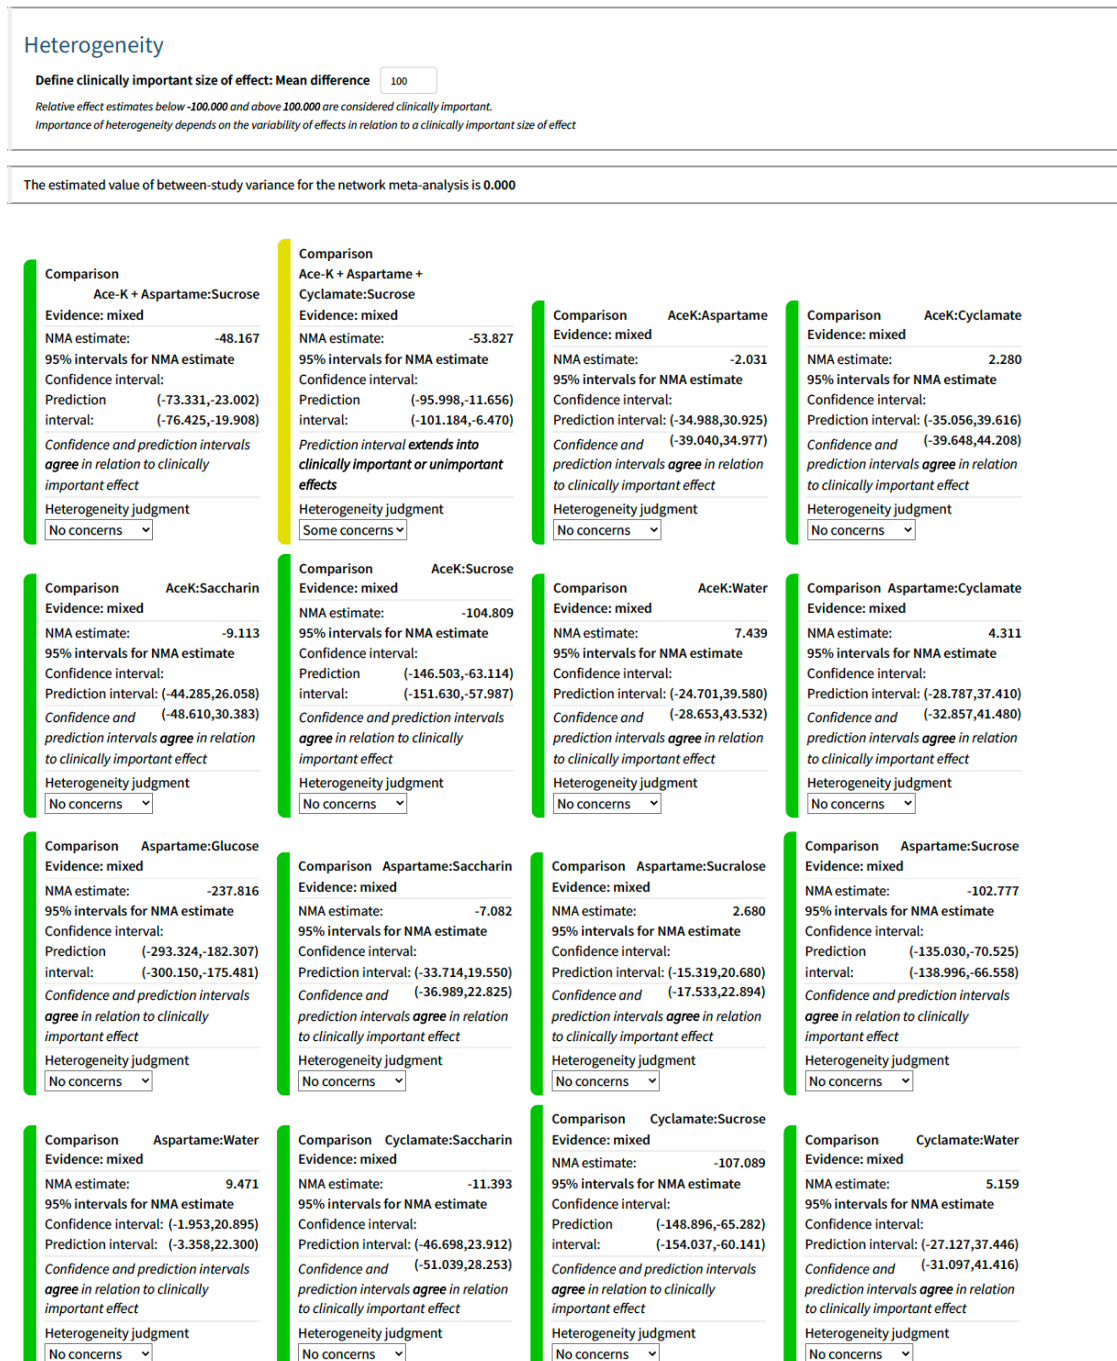

(continued on next page)



|                                                                                                                                                                                                                                                                                                                                                                                |                                                                                                                                                                                                                                                                                                                                                                   |                                                                                                                                                                                                                                                                                                                                                                                          |                                                                                                                                                                                                                                                                                                                                                                                                       |
|--------------------------------------------------------------------------------------------------------------------------------------------------------------------------------------------------------------------------------------------------------------------------------------------------------------------------------------------------------------------------------|-------------------------------------------------------------------------------------------------------------------------------------------------------------------------------------------------------------------------------------------------------------------------------------------------------------------------------------------------------------------|------------------------------------------------------------------------------------------------------------------------------------------------------------------------------------------------------------------------------------------------------------------------------------------------------------------------------------------------------------------------------------------|-------------------------------------------------------------------------------------------------------------------------------------------------------------------------------------------------------------------------------------------------------------------------------------------------------------------------------------------------------------------------------------------------------|
| <p>Comparison Fructose:Glucose<br/>Evidence: mixed</p> <p>NMA estimate: -199.294<br/>95% intervals for NMA estimate</p> <p>Confidence interval:<br/>Prediction (-260.661,-137.927)<br/>interval: (-268.207,-130.380)</p> <p>Confidence and prediction intervals agree in relation to clinically important effect</p> <p>Heterogeneity judgment<br/>No concerns</p>             | <p>Comparison Fructose:Sucralose<br/>Evidence: mixed</p> <p>NMA estimate: 41.202<br/>95% intervals for NMA estimate</p> <p>Confidence interval: (17.206,65.199)<br/>Prediction interval: (14.255,68.150)</p> <p>Confidence and prediction intervals agree in relation to clinically important effect</p> <p>Heterogeneity judgment<br/>No concerns</p>            | <p>Comparison Fructose:Sucrose<br/>Evidence: mixed</p> <p>NMA estimate: -64.255<br/>95% intervals for NMA estimate</p> <p>Confidence interval:<br/>Prediction (-104.338,-24.172)<br/>interval: (-109.267,-19.243)</p> <p>Confidence and prediction intervals agree in relation to clinically important effect</p> <p>Heterogeneity judgment<br/>No concerns</p>                          | <p>Comparison Glucose:Sucralose<br/>Evidence: mixed</p> <p>NMA estimate: 240.496<br/>95% intervals for NMA estimate</p> <p>Confidence interval:<br/>Prediction (183.900,297.092)<br/>interval: (176.940,304.052)</p> <p>Confidence and prediction intervals agree in relation to clinically important effect</p> <p>Heterogeneity judgment<br/>No concerns</p>                                        |
| <p>Comparison Glucose:Sucrose<br/>Evidence: mixed</p> <p>NMA estimate: 135.038<br/>95% intervals for NMA estimate</p> <p>Confidence interval:<br/>Prediction interval:(71.652,198.425)<br/>interval: (63.858,206.220)</p> <p>Confidence and prediction intervals agree in relation to clinically important effect</p> <p>Heterogeneity judgment<br/>No concerns</p>            | <p>Comparison Saccharin:Sucrose<br/>Evidence: mixed</p> <p>NMA estimate: -95.695<br/>95% intervals for NMA estimate</p> <p>Confidence interval:<br/>Prediction (-133.868,-57.523)<br/>interval: (-138.562,-52.829)</p> <p>Confidence and prediction intervals agree in relation to clinically important effect</p> <p>Heterogeneity judgment<br/>No concerns</p>  | <p>Comparison Saccharin:Water<br/>Evidence: mixed</p> <p>NMA estimate: 16.553<br/>95% intervals for NMA estimate</p> <p>Confidence interval: (-9.559,42.664)<br/>Prediction interval: (-12.770,45.875)</p> <p>Confidence and prediction intervals agree in relation to clinically important effect</p> <p>Heterogeneity judgment<br/>No concerns</p>                                     | <p>Comparison Stevia:Sucrose<br/>Evidence: mixed</p> <p>NMA estimate: -59.000<br/>95% intervals for NMA estimate</p> <p>Confidence interval:<br/>Prediction (-101.962,-16.038)<br/>interval: (-107.245,-10.755)</p> <p>Confidence and prediction intervals agree in relation to clinically important effect</p> <p>Heterogeneity judgment<br/>No concerns</p>                                         |
| <p>Comparison Sucralose:Sucrose<br/>Evidence: mixed</p> <p>NMA estimate: -105.458<br/>95% intervals for NMA estimate</p> <p>Confidence interval:<br/>Prediction (-137.729,-73.186)<br/>interval: (-141.698,-69.218)</p> <p>Confidence and prediction intervals agree in relation to clinically important effect</p> <p>Heterogeneity judgment<br/>No concerns</p>              | <p>Comparison Sucralose:Water<br/>Evidence: mixed</p> <p>NMA estimate: 6.790<br/>95% intervals for NMA estimate</p> <p>Confidence interval: (-7.610,21.191)<br/>Prediction interval: (-9.381,22.962)</p> <p>Confidence and prediction intervals agree in relation to clinically important effect</p> <p>Heterogeneity judgment<br/>No concerns</p>                | <p>Comparison Sucrose:Water<br/>Evidence: mixed</p> <p>NMA estimate: 112.248<br/>95% intervals for NMA estimate</p> <p>Confidence interval:<br/>Prediction interval:(81.526,142.970)<br/>interval: (77.748,146.748)</p> <p>Confidence and prediction intervals agree in relation to clinically important effect</p> <p>Heterogeneity judgment<br/>No concerns</p>                        | <p>Comparison Ace-K + Aspartame:Ace-K + Aspartame + Cyclamate<br/>Evidence: indirect</p> <p>NMA estimate: 5.660<br/>95% intervals for NMA estimate</p> <p>Confidence interval:<br/>Prediction interval: (-43.448,54.769)<br/>interval: (-49.487,60.808)</p> <p>Confidence and prediction intervals agree in relation to clinically important effect</p> <p>Heterogeneity judgment<br/>No concerns</p> |
| <p>Comparison Ace-K + Aspartame:Glucose<br/>Evidence: indirect</p> <p>NMA estimate: -56.642<br/>95% intervals for NMA estimate</p> <p>Confidence interval:<br/>Prediction (-105.342,-7.942)<br/>interval: (-111.330,-1.954)</p> <p>Confidence and prediction intervals agree in relation to clinically important effect</p> <p>Heterogeneity judgment<br/>No concerns</p>      | <p>Comparison Ace-K + Aspartame:Aspartame<br/>Evidence: indirect</p> <p>NMA estimate: 54.611<br/>95% intervals for NMA estimate</p> <p>Confidence interval: (13.703,95.519)<br/>Prediction interval: (8.672,100.549)</p> <p>Prediction interval extends into clinically important or unimportant effects</p> <p>Heterogeneity judgment<br/>Some concerns</p>      | <p>Comparison Ace-K + Aspartame:Cyclamate<br/>Evidence: indirect</p> <p>NMA estimate: 58.922<br/>95% intervals for NMA estimate</p> <p>Confidence interval:<br/>Prediction interval:(10.126,107.718)<br/>interval: (4.125,113.719)</p> <p>Confidence and prediction intervals agree in relation to clinically important effect</p> <p>Heterogeneity judgment<br/>No concerns</p>         | <p>Comparison Ace-K + Aspartame:Fructose<br/>Evidence: indirect</p> <p>NMA estimate: 16.089<br/>95% intervals for NMA estimate</p> <p>Confidence interval:<br/>Prediction interval: (-31.239,63.416)<br/>interval: (-37.059,69.236)</p> <p>Confidence and prediction intervals agree in relation to clinically important effect</p> <p>Heterogeneity judgment<br/>No concerns</p>                     |
| <p>Comparison Ace-K + Aspartame:Glucose<br/>Evidence: indirect</p> <p>NMA estimate: -183.205<br/>95% intervals for NMA estimate</p> <p>Confidence interval:<br/>Prediction (-251.404,-115.007)<br/>interval: (-259.790,-106.620)</p> <p>Confidence and prediction intervals agree in relation to clinically important effect</p> <p>Heterogeneity judgment<br/>No concerns</p> | <p>Comparison Ace-K + Aspartame:Saccharin<br/>Evidence: indirect</p> <p>NMA estimate: 47.529<br/>95% intervals for NMA estimate</p> <p>Confidence interval: (1.808,93.249)<br/>Prediction interval: (-3.814,98.872)</p> <p>Confidence and prediction intervals agree in relation to clinically important effect</p> <p>Heterogeneity judgment<br/>No concerns</p> | <p>Comparison Evidence:Ace-K + Aspartame:Stevia<br/>Evidence: indirect</p> <p>NMA estimate: 10.833<br/>95% intervals for NMA estimate</p> <p>Confidence interval:<br/>Prediction interval: (-38.956,60.623)<br/>interval: (-45.078,66.745)</p> <p>Confidence and prediction intervals agree in relation to clinically important effect</p> <p>Heterogeneity judgment<br/>No concerns</p> | <p>Comparison Ace-K + Aspartame:Sucralose<br/>Evidence: indirect</p> <p>NMA estimate: 57.291<br/>95% intervals for NMA estimate</p> <p>Confidence interval: (16.368,98.214)<br/>Prediction interval: (11.336,103.246)</p> <p>Prediction interval extends into clinically important or unimportant effects</p> <p>Heterogeneity judgment<br/>Some concerns</p>                                         |

(continued on next page)



|                                                                                                                                                                                                                                                                                                                                                                                                   |                                                                                                                                                                                                                                                                                                                                                                                                |                                                                                                                                                                                                                                                                                                                                                                                                    |                                                                                                                                                                                                                                                                                                                                                                                                    |
|---------------------------------------------------------------------------------------------------------------------------------------------------------------------------------------------------------------------------------------------------------------------------------------------------------------------------------------------------------------------------------------------------|------------------------------------------------------------------------------------------------------------------------------------------------------------------------------------------------------------------------------------------------------------------------------------------------------------------------------------------------------------------------------------------------|----------------------------------------------------------------------------------------------------------------------------------------------------------------------------------------------------------------------------------------------------------------------------------------------------------------------------------------------------------------------------------------------------|----------------------------------------------------------------------------------------------------------------------------------------------------------------------------------------------------------------------------------------------------------------------------------------------------------------------------------------------------------------------------------------------------|
| <p>Comparison<br/>Evidence: Ace-K + Aspartame:Water<br/>indirect</p> <p>NMA estimate: 64.081<br/>95% intervals for NMA estimate<br/>Confidence interval:<br/>Prediction interval:(24.369,103.794)<br/>Confidence and (19.485,108.677)<br/>prediction intervals <i>agree</i> in relation<br/>to clinically important effect</p> <p>Heterogeneity judgment<br/>No concerns</p>                      | <p>Comparison<br/>AceK:Ace-K + Aspartame +<br/>Cyclamate<br/>Evidence: indirect</p> <p>NMA estimate: -50.982<br/>95% intervals for NMA estimate<br/>Confidence interval:<br/>Prediction interval: (-110.284,8.321)<br/>Confidence and (-117.577,15.614)<br/>prediction intervals <i>agree</i> in relation<br/>to clinically important effect</p> <p>Heterogeneity judgment<br/>No concerns</p> | <p>Comparison<br/>Ace-K + Aspartame +<br/>Cyclamate:Aspartame<br/>Evidence: indirect</p> <p>NMA estimate: 48.950<br/>95% intervals for NMA estimate<br/>Confidence interval:<br/>Prediction interval: (-4.141,102.041)<br/>Confidence and (-10.669,108.569)<br/>prediction intervals <i>agree</i> in relation<br/>to clinically important effect</p> <p>Heterogeneity judgment<br/>No concerns</p> | <p>Comparison<br/>Ace-K + Aspartame +<br/>Cyclamate:Cyclamate<br/>Evidence: indirect</p> <p>NMA estimate: 53.262<br/>95% intervals for NMA estimate<br/>Confidence interval:<br/>Prediction interval: (-6.120,112.643)<br/>Confidence and (-13.422,119.946)<br/>prediction intervals <i>agree</i> in relation<br/>to clinically important effect</p> <p>Heterogeneity judgment<br/>No concerns</p> |
| <p>Comparison<br/>Ace-K + Aspartame +<br/>Cyclamate:Fructose<br/>Evidence: indirect</p> <p>NMA estimate: 10.428<br/>95% intervals for NMA estimate<br/>Confidence interval:<br/>Prediction interval: (-47.753,68.609)<br/>Confidence and (-54.907,75.764)<br/>prediction intervals <i>agree</i> in relation<br/>to clinically important effect</p> <p>Heterogeneity judgment<br/>No concerns</p>  | <p>Comparison<br/>Ace-K + Aspartame +<br/>Cyclamate:Glucose<br/>Evidence: indirect</p> <p>NMA estimate: -188.866<br/>95% intervals for NMA estimate<br/>Prediction interval: (-264.998,-112.733)<br/>interval: (-274.361,-103.371)<br/>Confidence and prediction intervals<br/><i>agree</i> in relation to clinically<br/>important effect</p> <p>Heterogeneity judgment<br/>No concerns</p>   | <p>Comparison<br/>Ace-K + Aspartame +<br/>Cyclamate:Saccharin<br/>Evidence: indirect</p> <p>NMA estimate: 41.868<br/>95% intervals for NMA estimate<br/>Confidence interval:<br/>Prediction interval: (-15.013,98.750)<br/>Prediction interval (-22.008,105.745)<br/><i>extends into clinically important or<br/>unimportant effects</i></p> <p>Heterogeneity judgment<br/>Some concerns</p>       | <p>Comparison<br/>Ace-K + Aspartame +<br/>Cyclamate:Stevia<br/>Evidence: indirect</p> <p>NMA estimate: 5.173<br/>95% intervals for NMA estimate<br/>Confidence interval:<br/>Prediction interval: (-55.028,65.373)<br/>Confidence and (-62.431,72.776)<br/>prediction intervals <i>agree</i> in relation<br/>to clinically important effect</p> <p>Heterogeneity judgment<br/>No concerns</p>      |
| <p>Comparison<br/>Ace-K + Aspartame +<br/>Cyclamate:Sucralose<br/>Evidence: indirect</p> <p>NMA estimate: 51.630<br/>95% intervals for NMA estimate<br/>Confidence interval:<br/>Prediction interval: (-1.472,104.733)<br/>Confidence and (-8.002,111.263)<br/>prediction intervals <i>agree</i> in relation<br/>to clinically important effect</p> <p>Heterogeneity judgment<br/>No concerns</p> | <p>Comparison<br/>Ace-K + Aspartame +<br/>Cyclamate:Water<br/>Evidence: indirect</p> <p>NMA estimate: 58.421<br/>95% intervals for NMA estimate<br/>Confidence interval: (6.246,110.596)<br/>Prediction interval: (-0.170,117.012)<br/>Prediction interval <i>extends into<br/>clinically important or unimportant<br/>effects</i></p> <p>Heterogeneity judgment<br/>Some concerns</p>         | <p>Comparison<br/>AceK:Fructose<br/>Evidence: indirect</p> <p>NMA estimate: -40.553<br/>95% intervals for NMA estimate<br/>Confidence interval: (-82.931,1.824)<br/>Prediction interval: (-88.142,7.035)<br/>Confidence and prediction intervals<br/><i>agree</i> in relation to clinically<br/>important effect</p> <p>Heterogeneity judgment<br/>No concerns</p>                                 | <p>Comparison<br/>AceK:Glucose<br/>Evidence: indirect</p> <p>NMA estimate: -239.847<br/>95% intervals for NMA estimate<br/>Confidence interval:<br/>Prediction interval: (-303.945,-175.749)<br/>interval: (-311.828,-167.867)<br/>Confidence and prediction intervals<br/><i>agree</i> in relation to clinically<br/>important effect</p> <p>Heterogeneity judgment<br/>No concerns</p>           |
| <p>Comparison<br/>AceK:Stevia<br/>Evidence: indirect</p> <p>NMA estimate: -45.809<br/>95% intervals for NMA estimate<br/>Confidence interval:<br/>Prediction interval: (-105.676,14.059)<br/>interval: (-113.038,21.421)<br/>Confidence and prediction intervals<br/><i>agree</i> in relation to clinically<br/>important effect</p> <p>Heterogeneity judgment<br/>No concerns</p>                | <p>Comparison<br/>AceK:Sucralose<br/>Evidence: indirect</p> <p>NMA estimate: 0.649<br/>95% intervals for NMA estimate<br/>Confidence interval:<br/>Prediction interval: (-34.325,35.623)<br/>Confidence and (-38.626,39.924)<br/>prediction intervals <i>agree</i> in relation<br/>to clinically important effect</p> <p>Heterogeneity judgment<br/>No concerns</p>                            | <p>Comparison<br/>Aspartame:Fructose<br/>Evidence: indirect</p> <p>NMA estimate: -38.522<br/>95% intervals for NMA estimate<br/>Confidence interval: (-68.479,-8.565)<br/>Prediction interval: (-72.162,-4.881)<br/>Confidence and prediction intervals<br/><i>agree</i> in relation to clinically<br/>important effect</p> <p>Heterogeneity judgment<br/>No concerns</p>                          | <p>Comparison<br/>Aspartame:Stevia<br/>Evidence: indirect</p> <p>NMA estimate: -43.777<br/>95% intervals for NMA estimate<br/>Confidence interval: (-97.498,9.944)<br/>Prediction interval:<br/>Prediction interval (-104.105,16.550)<br/><i>extends into clinically important or<br/>unimportant effects</i></p> <p>Heterogeneity judgment<br/>Some concerns</p>                                  |
| <p>Comparison<br/>Cyclamate:Fructose<br/>Evidence: indirect</p> <p>NMA estimate: -42.833<br/>95% intervals for NMA estimate<br/>Confidence interval: (-85.321,-0.345)<br/>Prediction interval: (-90.546,4.880)<br/>Confidence and prediction intervals<br/><i>agree</i> in relation to clinically<br/>important effect</p> <p>Heterogeneity judgment<br/>No concerns</p>                          | <p>Comparison<br/>Cyclamate:Glucose<br/>Evidence: indirect</p> <p>NMA estimate: -242.127<br/>95% intervals for NMA estimate<br/>Confidence interval:<br/>Prediction interval: (-306.299,-177.956)<br/>interval: (-314.190,-170.065)<br/>Confidence and prediction intervals<br/><i>agree</i> in relation to clinically<br/>important effect</p> <p>Heterogeneity judgment<br/>No concerns</p>  | <p>Comparison<br/>Cyclamate:Stevia<br/>Evidence: indirect</p> <p>NMA estimate: -48.089<br/>95% intervals for NMA estimate<br/>Confidence interval:<br/>Prediction interval: (-108.035,11.857)<br/>interval: (-115.406,19.229)<br/>Confidence and prediction intervals<br/><i>agree</i> in relation to clinically<br/>important effect</p> <p>Heterogeneity judgment<br/>No concerns</p>            | <p>Comparison<br/>Cyclamate:Sucralose<br/>Evidence: indirect</p> <p>NMA estimate: -1.631<br/>95% intervals for NMA estimate<br/>Confidence interval:<br/>Prediction interval: (-36.739,33.477)<br/>Confidence and (-41.056,37.794)<br/>prediction intervals <i>agree</i> in relation<br/>to clinically important effect</p> <p>Heterogeneity judgment<br/>No concerns</p>                          |

(continued on next page)



|                                                                                                                                                                                                                                                                                                                                                                                                           |                                                                                                                                                                                                                                                                                                                                                                                                          |                                                                                                                                                                                                                                                                                                                                                                                                      |                                                                                                                                                                                                                                                                                                                                                                                                              |
|-----------------------------------------------------------------------------------------------------------------------------------------------------------------------------------------------------------------------------------------------------------------------------------------------------------------------------------------------------------------------------------------------------------|----------------------------------------------------------------------------------------------------------------------------------------------------------------------------------------------------------------------------------------------------------------------------------------------------------------------------------------------------------------------------------------------------------|------------------------------------------------------------------------------------------------------------------------------------------------------------------------------------------------------------------------------------------------------------------------------------------------------------------------------------------------------------------------------------------------------|--------------------------------------------------------------------------------------------------------------------------------------------------------------------------------------------------------------------------------------------------------------------------------------------------------------------------------------------------------------------------------------------------------------|
| <p>Comparison      Fructose:Saccharin</p> <p>Evidence: indirect</p> <p>NMA estimate:                      31.440</p> <p>95% intervals for NMA estimate</p> <p>Confidence interval: (-6.609,69.490)</p> <p>Prediction interval: (-11.289,74.169)</p> <p>Confidence and prediction intervals <i>agree in relation to clinically important effect</i></p> <p>Heterogeneity judgment</p> <p>No concerns ▼</p> | <p>Comparison      Fructose:Stevia</p> <p>Evidence: indirect</p> <p>NMA estimate:                      -5.255</p> <p>95% intervals for NMA estimate</p> <p>Confidence interval: (-64.012,53.502)</p> <p>Prediction interval: (-71.238,60.727)</p> <p>Confidence and prediction intervals <i>agree in relation to clinically important effect</i></p> <p>Heterogeneity judgment</p> <p>No concerns ▼</p>  | <p>Comparison      Fructose:Water</p> <p>Evidence: indirect</p> <p>NMA estimate:                      47.993</p> <p>95% intervals for NMA estimate</p> <p>Confidence interval: (20.043,75.943)</p> <p>Prediction interval: (16.606,79.380)</p> <p>Confidence and prediction intervals <i>agree in relation to clinically important effect</i></p> <p>Heterogeneity judgment</p> <p>No concerns ▼</p> | <p>Comparison      Glucose:Saccharin</p> <p>Evidence: indirect</p> <p>NMA estimate:                      230.734</p> <p>95% intervals for NMA estimate</p> <p>Confidence interval: (169.572,291.896)</p> <p>Prediction interval: (162.051,299.417)</p> <p>Confidence and prediction intervals <i>agree in relation to clinically important effect</i></p> <p>Heterogeneity judgment</p> <p>No concerns ▼</p> |
| <p>Comparison      Glucose:Stevia</p> <p>Evidence: indirect</p> <p>NMA estimate:                      194.038</p> <p>95% intervals for NMA estimate</p> <p>Confidence interval: (117.465,270.612)</p> <p>Prediction interval: (108.048,280.029)</p> <p>Confidence and prediction intervals <i>agree in relation to clinically important effect</i></p> <p>Heterogeneity judgment</p> <p>No concerns ▼</p> | <p>Comparison      Glucose:Water</p> <p>Evidence: indirect</p> <p>NMA estimate:                      247.287</p> <p>95% intervals for NMA estimate</p> <p>Confidence interval: (191.300,303.273)</p> <p>Prediction interval: (184.415,310.158)</p> <p>Confidence and prediction intervals <i>agree in relation to clinically important effect</i></p> <p>Heterogeneity judgment</p> <p>No concerns ▼</p> | <p>Comparison      Saccharin:Stevia</p> <p>Evidence: indirect</p> <p>NMA estimate:                      -36.696</p> <p>95% intervals for NMA estimate</p> <p>Confidence interval: (-94.166,20.775)</p> <p>Prediction interval: (-101.233,27.842)</p> <p>Prediction interval <i>extends into clinically important or unimportant effects</i></p> <p>Heterogeneity judgment</p> <p>Some concerns ▼</p> | <p>Comparison      Saccharin:Sucralose</p> <p>Evidence: indirect</p> <p>NMA estimate:                      9.762</p> <p>95% intervals for NMA estimate</p> <p>Confidence interval: (-19.815,39.340)</p> <p>Prediction interval: (-23.452,42.977)</p> <p>Confidence and prediction intervals <i>agree in relation to clinically important effect</i></p> <p>Heterogeneity judgment</p> <p>No concerns ▼</p>   |
| <p>Comparison      Stevia:Sucralose</p> <p>Evidence: indirect</p> <p>NMA estimate:                      46.458</p> <p>95% intervals for NMA estimate</p> <p>Confidence interval: (-13.882,106.798)</p> <p>Prediction interval: (-7.275,100.190)</p> <p>Confidence and prediction intervals <i>agree in relation to clinically important effect</i></p> <p>Heterogeneity judgment</p> <p>No concerns ▼</p> | <p>Comparison      Stevia:Water</p> <p>Evidence: indirect</p> <p>NMA estimate:                      53.248</p> <p>95% intervals for NMA estimate</p> <p>Confidence interval: (0.432,106.064)</p> <p>Prediction interval: (-6.063,112.559)</p> <p>Prediction interval <i>extends into clinically important or unimportant effects</i></p> <p>Heterogeneity judgment</p> <p>Some concerns ▼</p>            |                                                                                                                                                                                                                                                                                                                                                                                                      |                                                                                                                                                                                                                                                                                                                                                                                                              |

Judgements for were assigned by the CiNEMA algorithm (27, 28).



**Figure S9.** CIneMA output for the INCOHERENCE domain of UNCOUPLING INTERVENTIONS examining non-nutritive sweetened beverages (NNS beverages) sweetened with individual or blends of non-nutritive sweeteners (NNS), water, and sugar-sweetened beverages (SSBs) sweetened with caloric sweeteners on postprandial blood GLUCOSE response in HEALTHY participants

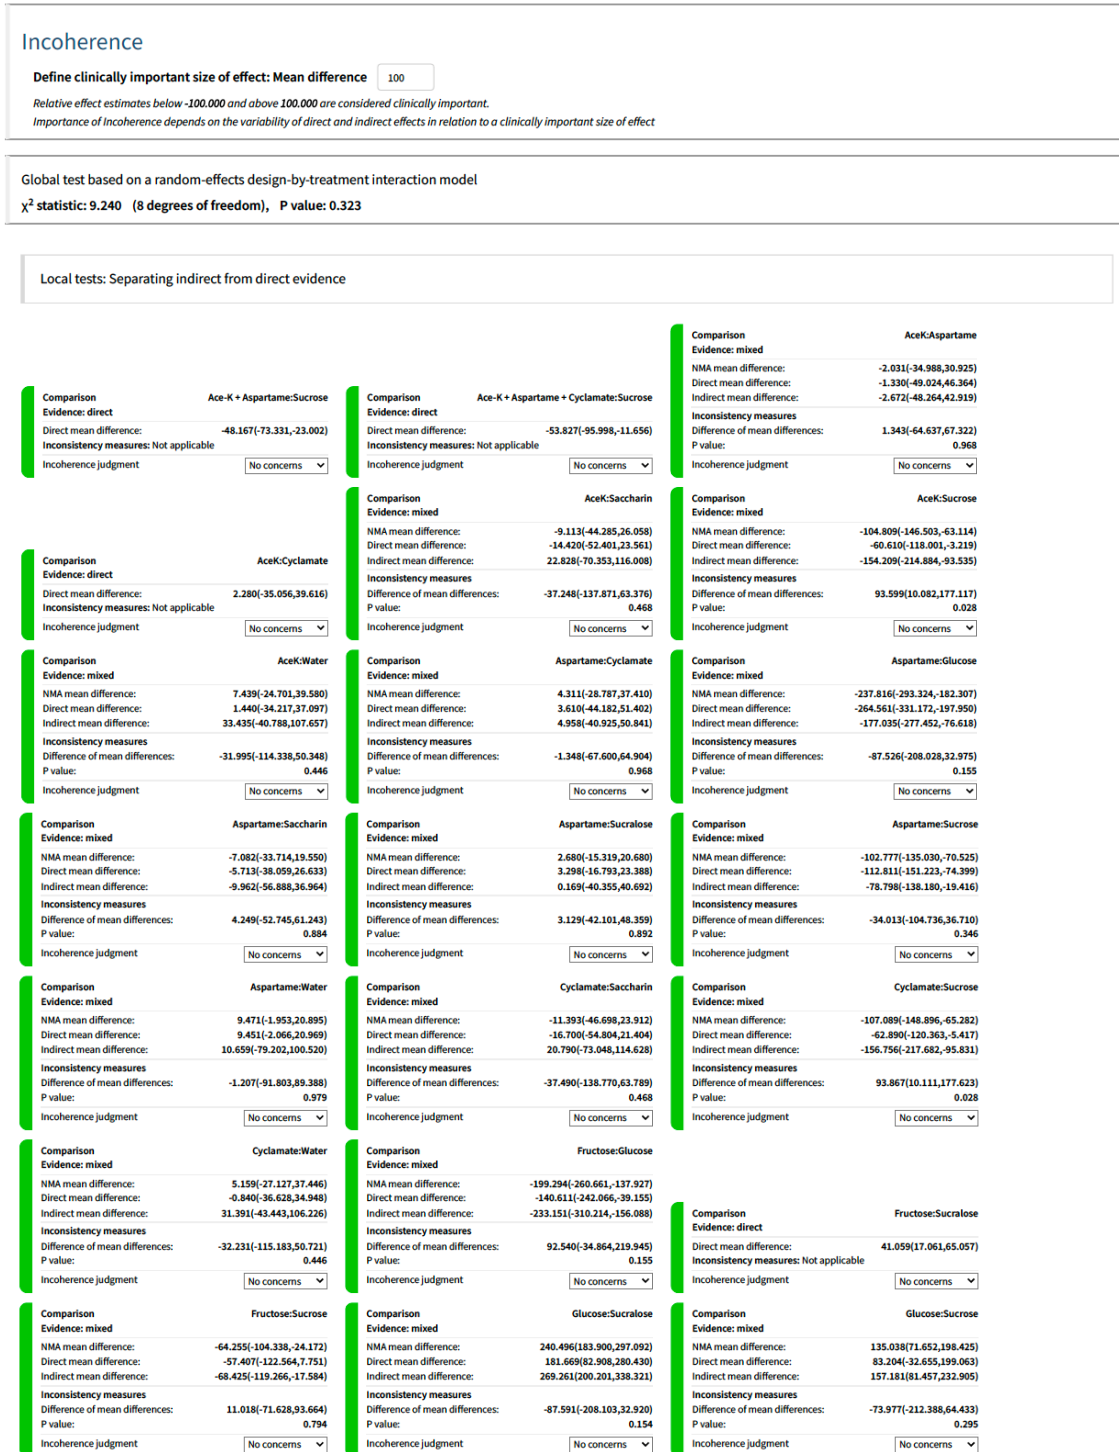



|                                                                                                                                                                                                                                                                                                                                                                                              |                                                                                                                                                                                                                                                                                                                                                                                   |                                                                                                                                                                                                                                                                                                                                                                                     |
|----------------------------------------------------------------------------------------------------------------------------------------------------------------------------------------------------------------------------------------------------------------------------------------------------------------------------------------------------------------------------------------------|-----------------------------------------------------------------------------------------------------------------------------------------------------------------------------------------------------------------------------------------------------------------------------------------------------------------------------------------------------------------------------------|-------------------------------------------------------------------------------------------------------------------------------------------------------------------------------------------------------------------------------------------------------------------------------------------------------------------------------------------------------------------------------------|
| <b>Comparison</b><br><b>Evidence: mixed</b><br>NMA mean difference: -95.695(-133.868,-57.523)<br>Direct mean difference: -46.190(-104.084,11.704)<br>Indirect mean difference: -133.769(-184.541,-82.998)<br><b>Inconsistency measures</b><br>Difference of mean differences: 87.579(10.576,164.583)<br>P value: 0.026<br>Incoherence judgment <input type="button" value="No concerns"/>    | <b>Comparison</b><br><b>Evidence: mixed</b><br>NMA mean difference: 16.553(-9.559,42.664)<br>Direct mean difference: 9.847(-19.181,38.875)<br>Indirect mean difference: 44.982(-14.788,104.753)<br><b>Inconsistency measures</b><br>Difference of mean differences: -35.135(-101.582,31.311)<br>P value: 0.300<br>Incoherence judgment <input type="button" value="No concerns"/> | <b>Comparison</b><br><b>Evidence: direct</b><br>Direct mean difference: -59.000(-101.962,-16.038)<br><b>Inconsistency measures:</b> Not applicable<br>Incoherence judgment <input type="button" value="No concerns"/>                                                                                                                                                               |
| <b>Comparison</b><br><b>Evidence: mixed</b><br>NMA mean difference: -105.458(-137.729,-73.186)<br>Direct mean difference: -127.048(-165.034,-89.062)<br>Indirect mean difference: -49.458(-110.635,11.720)<br><b>Inconsistency measures</b><br>Difference of mean differences: -77.590(-149.602,-5.579)<br>P value: 0.035<br>Incoherence judgment <input type="button" value="No concerns"/> | <b>Comparison</b><br><b>Evidence: mixed</b><br>NMA mean difference: 6.790(-7.610,21.191)<br>Direct mean difference: 5.194(-9.615,20.002)<br>Indirect mean difference: 34.584(-27.202,96.369)<br><b>Inconsistency measures</b><br>Difference of mean differences: -29.390(-92.925,34.145)<br>P value: 0.365<br>Incoherence judgment <input type="button" value="No concerns"/>     | <b>Comparison</b><br><b>Evidence: mixed</b><br>NMA mean difference: 112.248(81.526,142.970)<br>Direct mean difference: 116.172(80.477,151.868)<br>Indirect mean difference: 101.035(40.699,161.372)<br><b>Inconsistency measures</b><br>Difference of mean differences: 15.137(-54.968,85.242)<br>P value: 0.672<br>Incoherence judgment <input type="button" value="No concerns"/> |
| <b>Comparison</b><br><b>Evidence: indirect</b><br>Indirect mean difference: 5.660(-43.448,54.769)<br><b>Inconsistency measures:</b> Not applicable<br>Incoherence judgment <input type="button" value="No concerns"/>                                                                                                                                                                        | <b>Comparison</b><br><b>Evidence: indirect</b><br>Indirect mean difference: -56.642(-105.342,-7.942)<br><b>Inconsistency measures:</b> Not applicable<br>Incoherence judgment <input type="button" value="No concerns"/>                                                                                                                                                          | <b>Comparison</b><br><b>Evidence: indirect</b><br>Indirect mean difference: 54.611(13.703,95.519)<br><b>Inconsistency measures:</b> Not applicable<br>Incoherence judgment <input type="button" value="No concerns"/>                                                                                                                                                               |
| <b>Comparison</b><br><b>Evidence: indirect</b><br>Indirect mean difference: 58.922(10.126,107.718)<br><b>Inconsistency measures:</b> Not applicable<br>Incoherence judgment <input type="button" value="No concerns"/>                                                                                                                                                                       | <b>Comparison</b><br><b>Evidence: indirect</b><br>Indirect mean difference: 16.089(-31.239,63.416)<br><b>Inconsistency measures:</b> Not applicable<br>Incoherence judgment <input type="button" value="No concerns"/>                                                                                                                                                            | <b>Comparison</b><br><b>Evidence: indirect</b><br>Indirect mean difference: -183.205(-251.404,-115.007)<br><b>Inconsistency measures:</b> Not applicable<br>Incoherence judgment <input type="button" value="No concerns"/>                                                                                                                                                         |
| <b>Comparison</b><br><b>Evidence: indirect</b><br>Indirect mean difference: 47.529(1.808,93.249)<br><b>Inconsistency measures:</b> Not applicable<br>Incoherence judgment <input type="button" value="No concerns"/>                                                                                                                                                                         | <b>Comparison</b><br><b>Evidence: indirect</b><br>Indirect mean difference: 10.833(-38.956,60.623)<br><b>Inconsistency measures:</b> Not applicable<br>Incoherence judgment <input type="button" value="No concerns"/>                                                                                                                                                            | <b>Comparison</b><br><b>Evidence: indirect</b><br>Indirect mean difference: 57.291(16.368,98.214)<br><b>Inconsistency measures:</b> Not applicable<br>Incoherence judgment <input type="button" value="No concerns"/>                                                                                                                                                               |
| <b>Comparison</b><br><b>Evidence: indirect</b><br>Indirect mean difference: 64.081(24.369,103.794)<br><b>Inconsistency measures:</b> Not applicable<br>Incoherence judgment <input type="button" value="No concerns"/>                                                                                                                                                                       | <b>Comparison</b><br><b>Evidence: indirect</b><br>Indirect mean difference: -50.982(-110.284,8.321)<br><b>Inconsistency measures:</b> Not applicable<br>Incoherence judgment <input type="button" value="No concerns"/>                                                                                                                                                           | <b>Comparison</b><br><b>Evidence: indirect</b><br>Indirect mean difference: 48.950(-4.141,102.041)<br><b>Inconsistency measures:</b> Not applicable<br>Incoherence judgment <input type="button" value="No concerns"/>                                                                                                                                                              |
| <b>Comparison</b><br><b>Evidence: indirect</b><br>Indirect mean difference: 53.262(-6.120,112.643)<br><b>Inconsistency measures:</b> Not applicable<br>Incoherence judgment <input type="button" value="No concerns"/>                                                                                                                                                                       | <b>Comparison</b><br><b>Evidence: indirect</b><br>Indirect mean difference: 10.428(-47.753,68.609)<br><b>Inconsistency measures:</b> Not applicable<br>Incoherence judgment <input type="button" value="No concerns"/>                                                                                                                                                            | <b>Comparison</b><br><b>Evidence: indirect</b><br>Indirect mean difference: -188.866(-264.998,-112.733)<br><b>Inconsistency measures:</b> Not applicable<br>Incoherence judgment <input type="button" value="No concerns"/>                                                                                                                                                         |
| <b>Comparison</b><br><b>Evidence: indirect</b><br>Indirect mean difference: 41.868(-15.013,98.750)<br><b>Inconsistency measures:</b> Not applicable<br>Incoherence judgment <input type="button" value="No concerns"/>                                                                                                                                                                       | <b>Comparison</b><br><b>Evidence: indirect</b><br>Indirect mean difference: 5.173(-55.028,65.373)<br><b>Inconsistency measures:</b> Not applicable<br>Incoherence judgment <input type="button" value="No concerns"/>                                                                                                                                                             | <b>Comparison</b><br><b>Evidence: indirect</b><br>Indirect mean difference: 51.630(-147.102,733)<br><b>Inconsistency measures:</b> Not applicable<br>Incoherence judgment <input type="button" value="No concerns"/>                                                                                                                                                                |
| <b>Comparison</b><br><b>Evidence: indirect</b><br>Indirect mean difference: 58.421(6.246,110.596)<br><b>Inconsistency measures:</b> Not applicable<br>Incoherence judgment <input type="button" value="No concerns"/>                                                                                                                                                                        | <b>Comparison</b><br><b>Evidence: indirect</b><br>Indirect mean difference: -40.553(-82.931,1.824)<br><b>Inconsistency measures:</b> Not applicable<br>Incoherence judgment <input type="button" value="No concerns"/>                                                                                                                                                            | <b>Comparison</b><br><b>Evidence: indirect</b><br>Indirect mean difference: -239.847(-303.945,-175.749)<br><b>Inconsistency measures:</b> Not applicable<br>Incoherence judgment <input type="button" value="No concerns"/>                                                                                                                                                         |
| <b>Comparison</b><br><b>Evidence: indirect</b><br>Indirect mean difference: -45.809(-105.676,14.059)<br><b>Inconsistency measures:</b> Not applicable<br>Incoherence judgment <input type="button" value="No concerns"/>                                                                                                                                                                     | <b>Comparison</b><br><b>Evidence: indirect</b><br>Indirect mean difference: 0.649(-34.325,35.623)<br><b>Inconsistency measures:</b> Not applicable<br>Incoherence judgment <input type="button" value="No concerns"/>                                                                                                                                                             | <b>Comparison</b><br><b>Evidence: indirect</b><br>Indirect mean difference: -38.522(-68.479,-8.565)<br><b>Inconsistency measures:</b> Not applicable<br>Incoherence judgment <input type="button" value="No concerns"/>                                                                                                                                                             |
| <b>Comparison</b><br><b>Evidence: indirect</b><br>Indirect mean difference: -43.777(-97.498,9.944)<br><b>Inconsistency measures:</b> Not applicable<br>Incoherence judgment <input type="button" value="No concerns"/>                                                                                                                                                                       | <b>Comparison</b><br><b>Evidence: indirect</b><br>Indirect mean difference: -42.833(-85.321,-0.345)<br><b>Inconsistency measures:</b> Not applicable<br>Incoherence judgment <input type="button" value="No concerns"/>                                                                                                                                                           | <b>Comparison</b><br><b>Evidence: indirect</b><br>Indirect mean difference: -242.127(-306.299,-177.956)<br><b>Inconsistency measures:</b> Not applicable<br>Incoherence judgment <input type="button" value="No concerns"/>                                                                                                                                                         |
| <b>Comparison</b><br><b>Evidence: indirect</b><br>Indirect mean difference: -48.089(-108.035,11.857)<br><b>Inconsistency measures:</b> Not applicable<br>Incoherence judgment <input type="button" value="No concerns"/>                                                                                                                                                                     | <b>Comparison</b><br><b>Evidence: indirect</b><br>Indirect mean difference: -1.631(-36.739,33.477)<br><b>Inconsistency measures:</b> Not applicable<br>Incoherence judgment <input type="button" value="No concerns"/>                                                                                                                                                            | <b>Comparison</b><br><b>Evidence: indirect</b><br>Indirect mean difference: 31.440(-6.609,69.490)<br><b>Inconsistency measures:</b> Not applicable<br>Incoherence judgment <input type="button" value="No concerns"/>                                                                                                                                                               |
| <b>Comparison</b><br><b>Evidence: indirect</b><br>Indirect mean difference: -5.255(-64.012,53.502)<br><b>Inconsistency measures:</b> Not applicable<br>Incoherence judgment <input type="button" value="No concerns"/>                                                                                                                                                                       | <b>Comparison</b><br><b>Evidence: indirect</b><br>Indirect mean difference: 47.993(20.043,75.943)<br><b>Inconsistency measures:</b> Not applicable<br>Incoherence judgment <input type="button" value="No concerns"/>                                                                                                                                                             | <b>Comparison</b><br><b>Evidence: indirect</b><br>Indirect mean difference: 230.734(169.572,291.896)<br><b>Inconsistency measures:</b> Not applicable<br>Incoherence judgment <input type="button" value="No concerns"/>                                                                                                                                                            |
| <b>Comparison</b><br><b>Evidence: indirect</b><br>Indirect mean difference: 194.038(117.465,270.612)<br><b>Inconsistency measures:</b> Not applicable<br>Incoherence judgment <input type="button" value="No concerns"/>                                                                                                                                                                     | <b>Comparison</b><br><b>Evidence: indirect</b><br>Indirect mean difference: 247.287(191.300,303.273)<br><b>Inconsistency measures:</b> Not applicable<br>Incoherence judgment <input type="button" value="No concerns"/>                                                                                                                                                          | <b>Comparison</b><br><b>Evidence: indirect</b><br>Indirect mean difference: -36.696(-94.166,20.775)<br><b>Inconsistency measures:</b> Not applicable<br>Incoherence judgment <input type="button" value="No concerns"/>                                                                                                                                                             |
| <b>Comparison</b><br><b>Evidence: indirect</b><br>Indirect mean difference: 9.762(-19.815,39.340)<br><b>Inconsistency measures:</b> Not applicable<br>Incoherence judgment <input type="button" value="No concerns"/>                                                                                                                                                                        | <b>Comparison</b><br><b>Evidence: indirect</b><br>Indirect mean difference: 46.458(-7.275,100.190)<br><b>Inconsistency measures:</b> Not applicable<br>Incoherence judgment <input type="button" value="No concerns"/>                                                                                                                                                            | <b>Comparison</b><br><b>Evidence: indirect</b><br>Indirect mean difference: 53.248(0.432,106.064)<br><b>Inconsistency measures:</b> Not applicable<br>Incoherence judgment <input type="button" value="No concerns"/>                                                                                                                                                               |



**Figure S10.** Risk of bias assessment of UNCOUPLING INTERVENTIONS examining non-nutritive sweetened beverages (NNS beverages) sweetened with individual or blends of non-nutritive sweeteners (NNS), water, and sugar-sweetened beverages (SSBs) sweetened with caloric sweeteners on postprandial blood GLUCOSE response in participants with TYPE 2 DIABETES

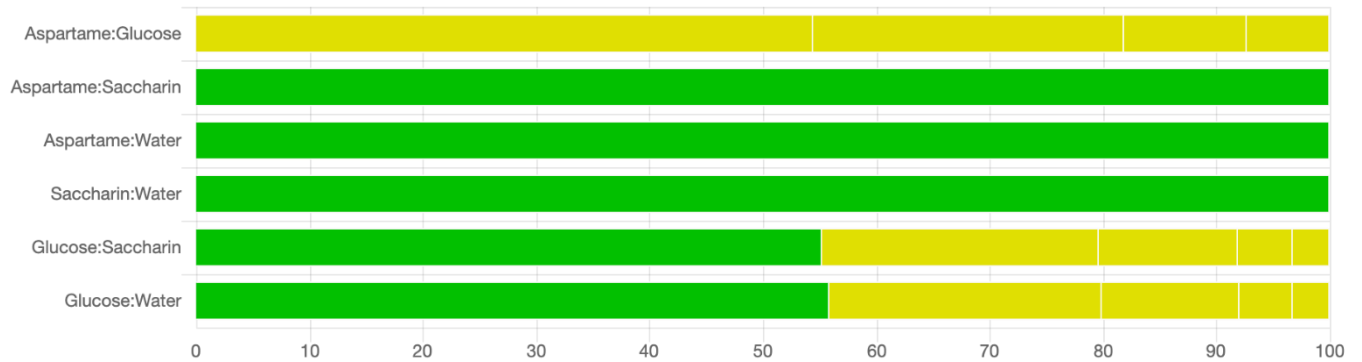

Green = no concerns; yellow = some concerns; red = major concerns



**Figure S11.** CINeMA output for the IMPRECISION domain of UNCOUPLING INTERVENTIONS examining non-nutritive sweetened beverages (NNS beverages) sweetened with individual or blends of non-nutritive sweeteners (NNS), water, and sugar-sweetened beverages (SSBs) sweetened with caloric sweeteners on postprandial blood GLUCOSE response in participants with TYPE 2 DIABETES

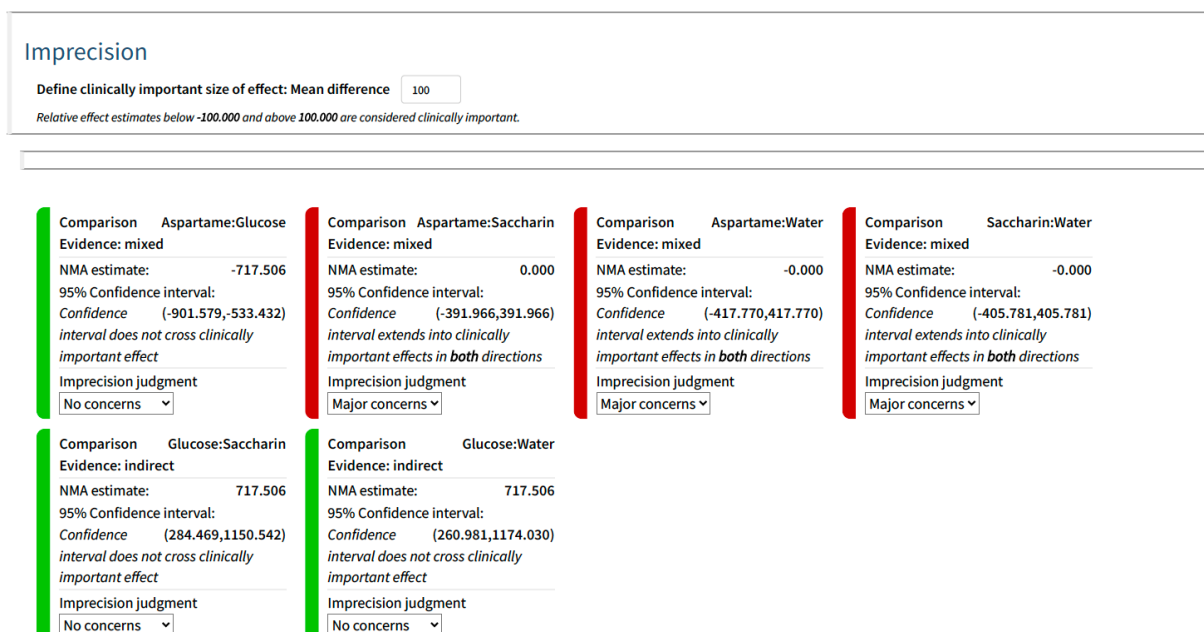

Relative effect estimates below -100.0 and above 100.0 mmol\*min/L (minimal important difference; MID) were considered clinically important. Judgements for IMPRECISION were assigned by the CINeMA algorithm (27, 28). There is no general consensus on a clinically important size difference for 2-hour blood glucose incremental area under the curve (iAUC). Health Canada considers a 20% reduction in glucose iAUC to be the minimum physiologically relevant difference as per “Guideline Concerning the Safety and Physiological Effects of Novel Fibre Sources and Food Products Containing Them” (29). Thus, we calculated the MID of glucose iAUC by taking 20% of 500 mmol\*mins/L which is the median of glucose iAUC in healthy participants (~300 mmol\*mins/L) and those with type 2 diabetes (~700 mmol\*mins/L) after a 75-g oral glucose tolerance test (32-34).



**Figure S12.** CINeMA output for the HETEROGENEITY domain of UNCOUPLING INTERVENTIONS examining non-nutritive sweetened beverages (NNS beverages) sweetened with individual or blends of non-nutritive sweeteners (NNS), water, and sugar-sweetened beverages (SSBs) sweetened with caloric sweeteners on postprandial blood GLUCOSE response in participants with TYPE 2 DIABETES

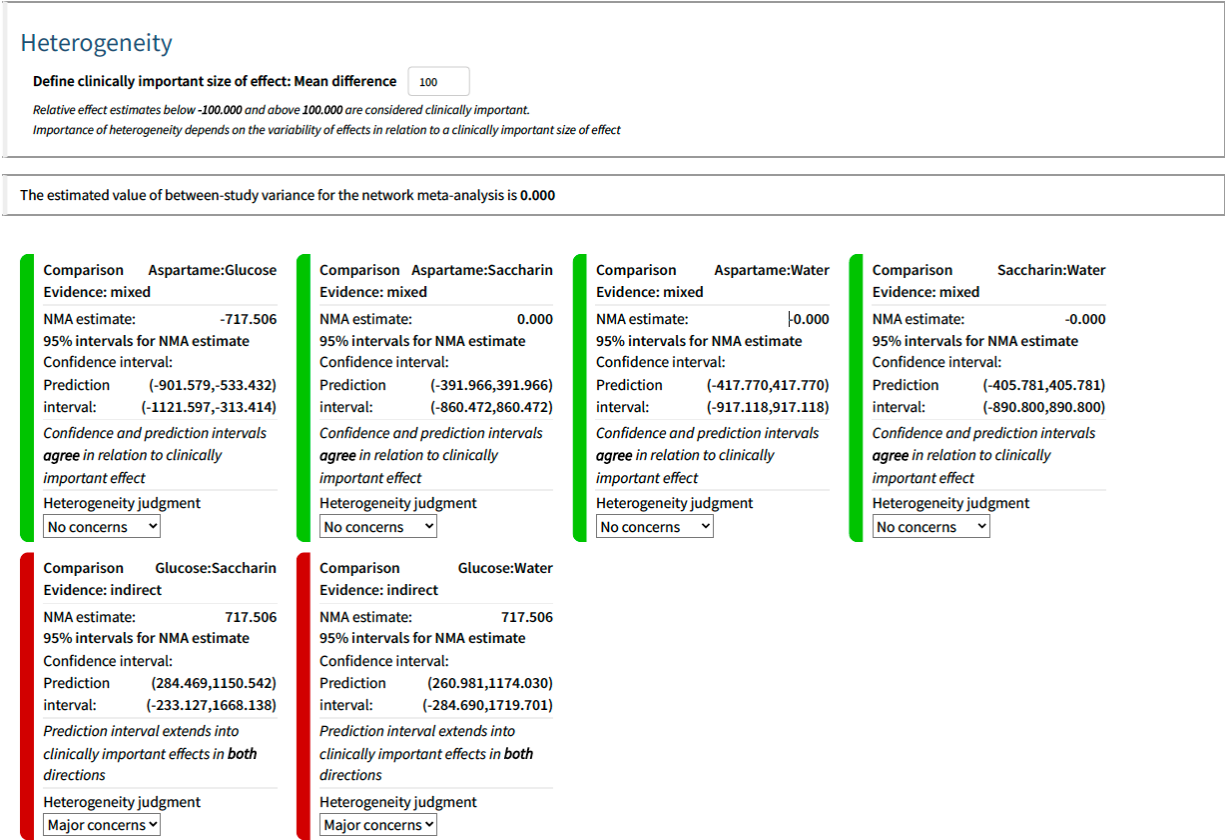



**Figure S13.** CINeMA output for the INCOHERENCE domain of UNCOUPLING INTERVENTIONS examining non-nutritive sweetened beverages (NNS beverages) sweetened with individual or blends of non-nutritive sweeteners (NNS), water, and sugar-sweetened beverages (SSBs) sweetened with caloric sweeteners on postprandial blood GLUCOSE response in participants with TYPE 2 DIABETES

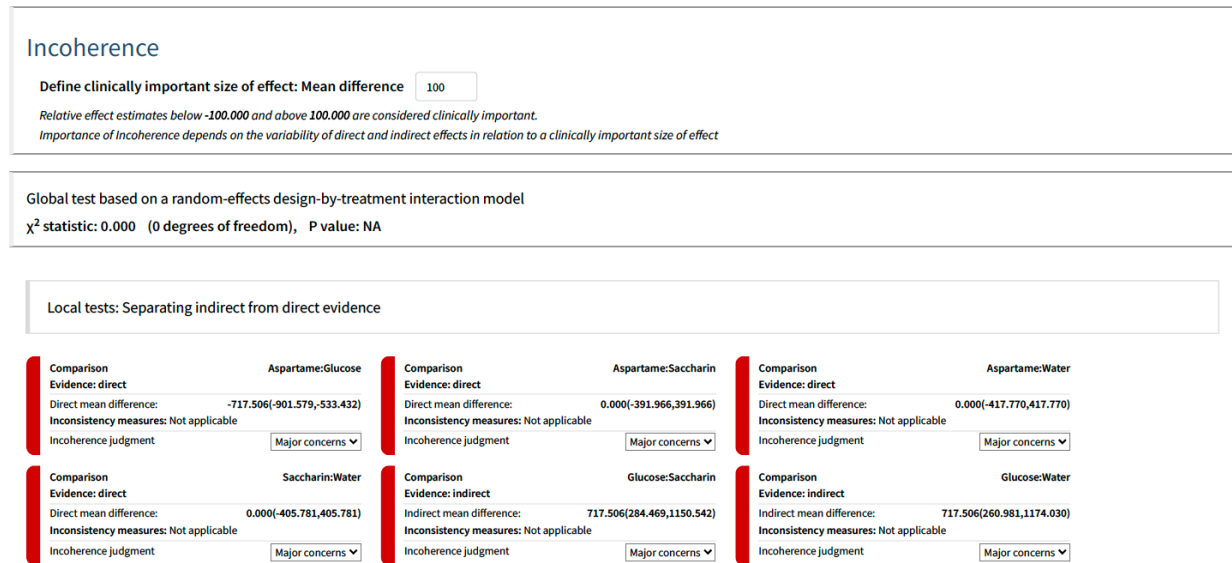

Judgements for were assigned by the CiNeMA algorithm (27, 28).



**Figure S14.** Network plot and meta-analysis of UNCOUPLING INTERVENTIONS evaluating the effect of non-nutritive sweetened beverages (NNS beverages) sweetened single or blends of non-nutritive sweeteners (NNS), water, and sugar-sweetened beverages (SSBs) sweetened with caloric sweeteners on postprandial blood INSULIN response in HEALTHY participants

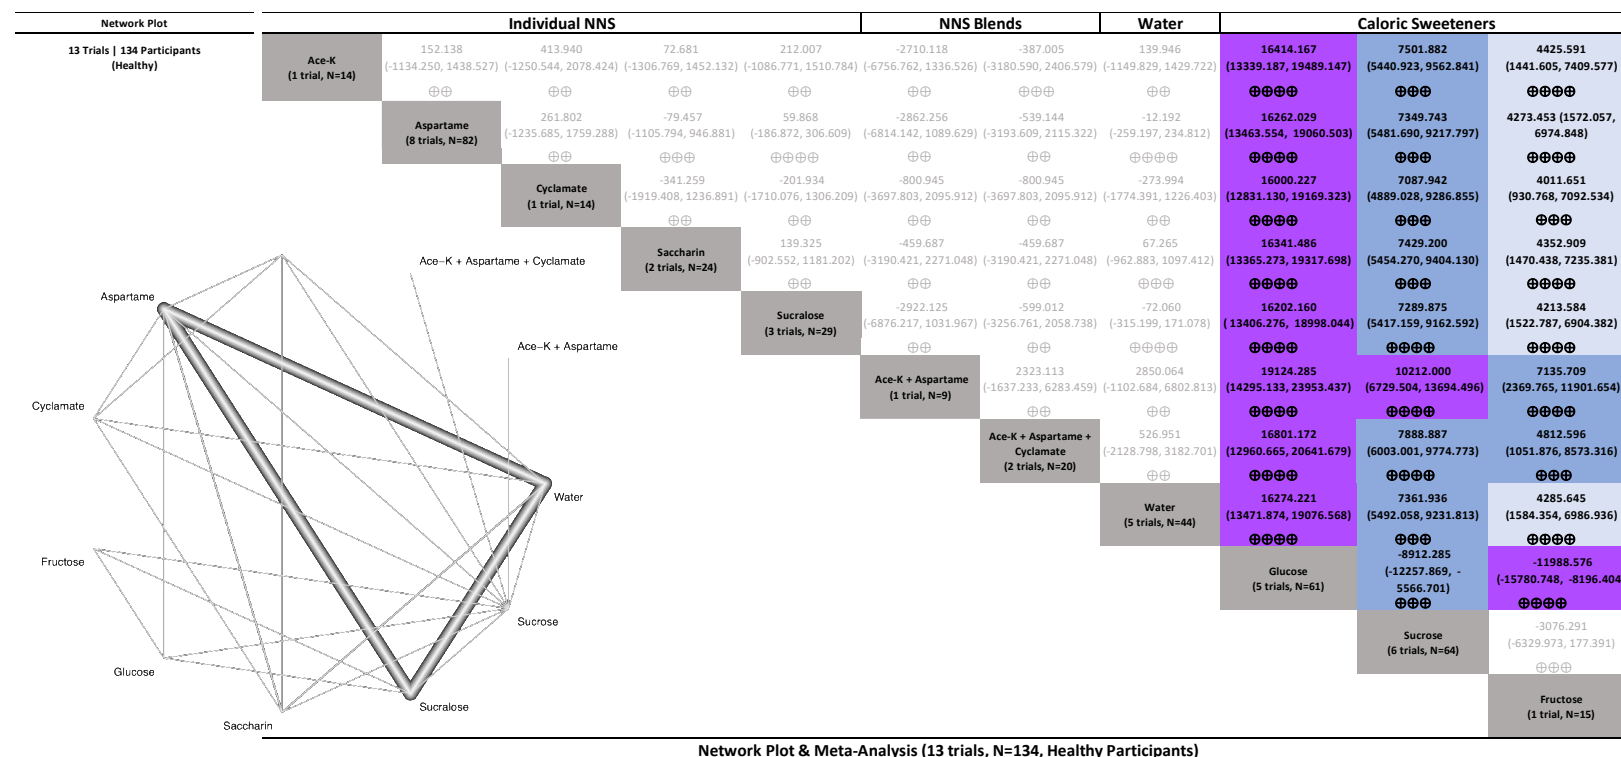

Network plot: the size of the blue nodes is proportional to the number of participants and the line width is proportional to the number of studies. Network table: treatments are grouped by treatment type (i.e., individual non-nutritive sweeteners (NNS), NNS blends, water and caloric sweeteners) and are reported in alphabetical order. Treatment estimates (pmol\*min/L) are MDs and 95% CIs of the column-defining treatment compared with the row-defining treatment. MDs less than 0 favor the column-defining treatment. MDs greater than 0 favor the row-defining treatment. Significant results are bolded in black. Non-significant results are grey and not bolded. The minimally important difference (MID) for postprandial insulin response is 2250 pmol\*min/L. Trivial (significant) effects (<1 MID) or no effects have a white background; small important effects ( $\geq 1$  MID) have a light blue background; moderate effects ( $\geq 2$  MID) have a darker blue background; large effects ( $\geq 5$  to <10 MID) have a purple background; very large effects



( $\geq 10$  MID) have a black background. Confidence in the effect estimate is shown for each treatment comparison: high confidence  $\oplus\oplus\oplus\oplus$ ; moderate confidence  $\oplus\oplus\oplus$ ; low confidence  $\oplus\oplus$ ; very low confidence  $\oplus$ . See **Supplementary Table 8 and Figures 15-18** for detailed assessments of the confidence in the effect estimate using the CINeMA framework.



**Figure S15.** Risk of bias assessment of UNCOUPLING INTERVENTIONS evaluating the effect of non-nutritive sweetened beverages (NNS beverages) sweetened single or blends of non-nutritive sweeteners (NNS), water, and sugar-sweetened beverages (SSBs) sweetened with caloric sweeteners on postprandial blood INSULIN response in HEALTHY participants

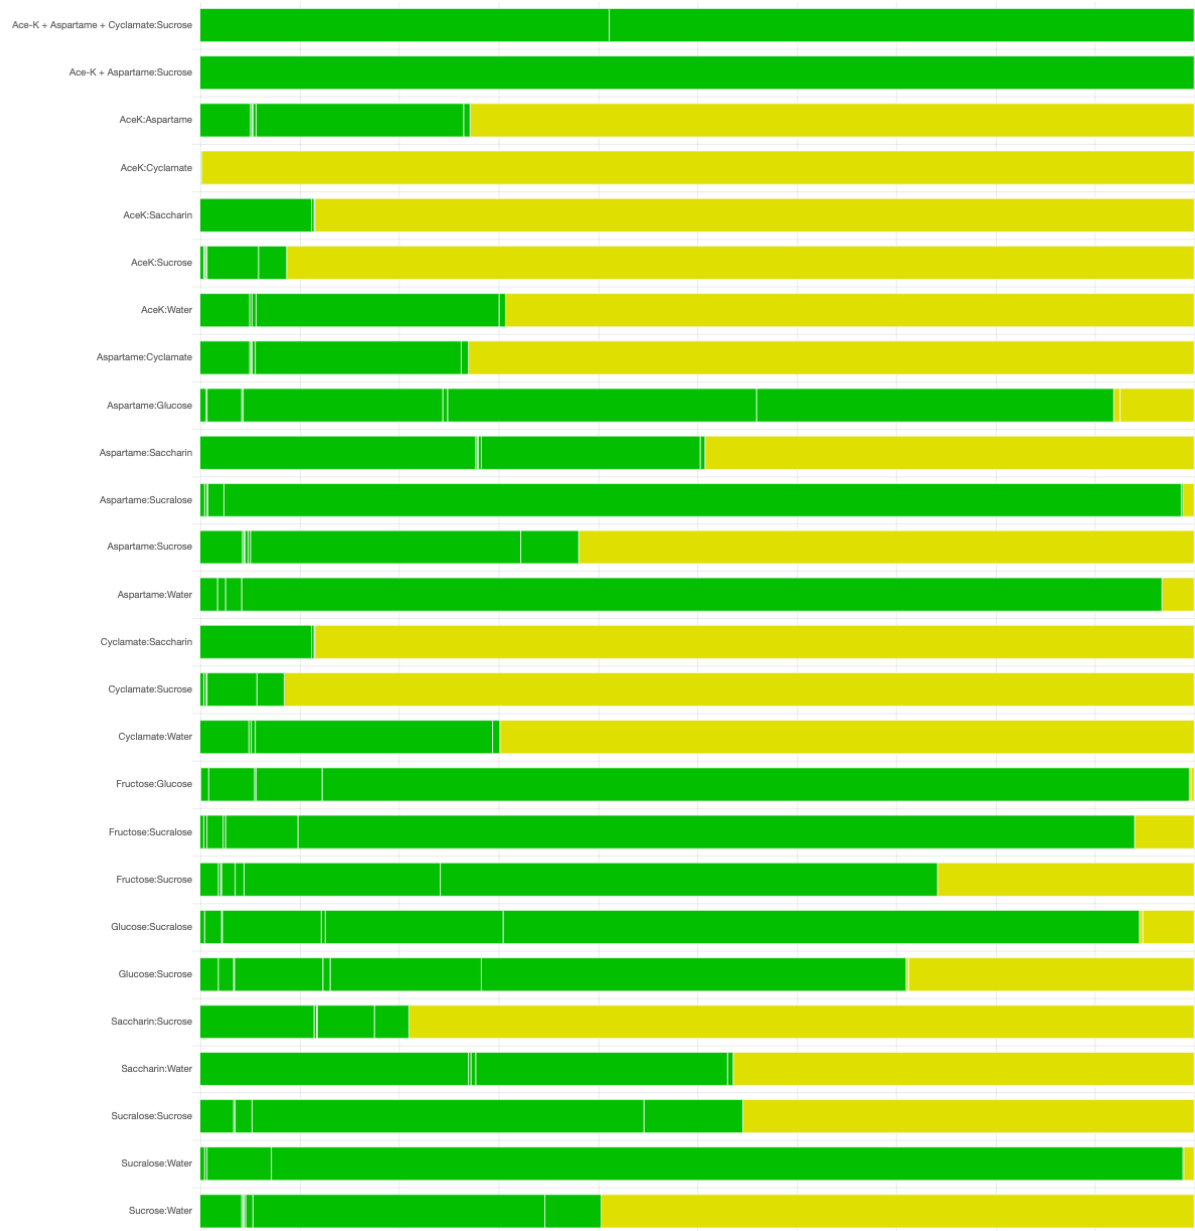



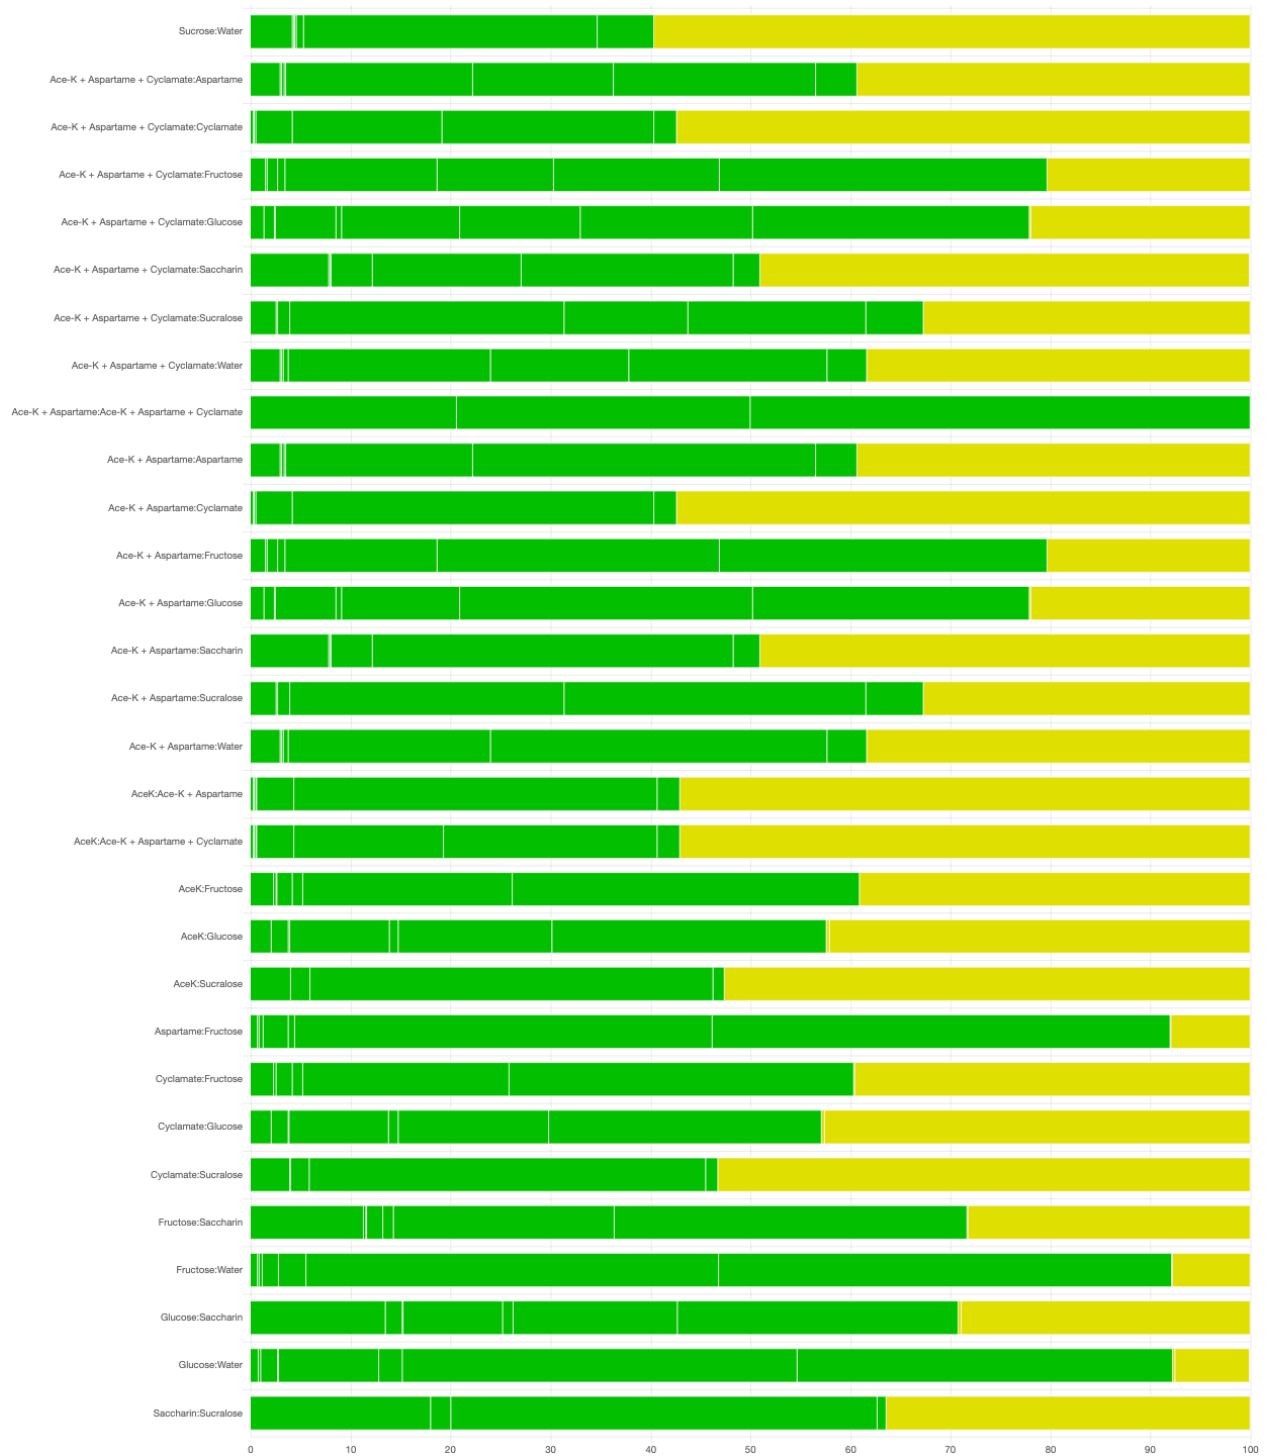

Green = no concerns; yellow = some concerns; red = major concerns



**Figure S16.** CINeMA output for the IMPRECISION domain of UNCOUPLING INTERVENTIONS evaluating the effect of non-nutritive sweetened beverages (NNS beverages) sweetened single or blends of non-nutritive sweeteners (NNS), water, and sugar-sweetened beverages (SSBs) sweetened with caloric sweeteners on postprandial blood INSULIN response in HEALTHY participants

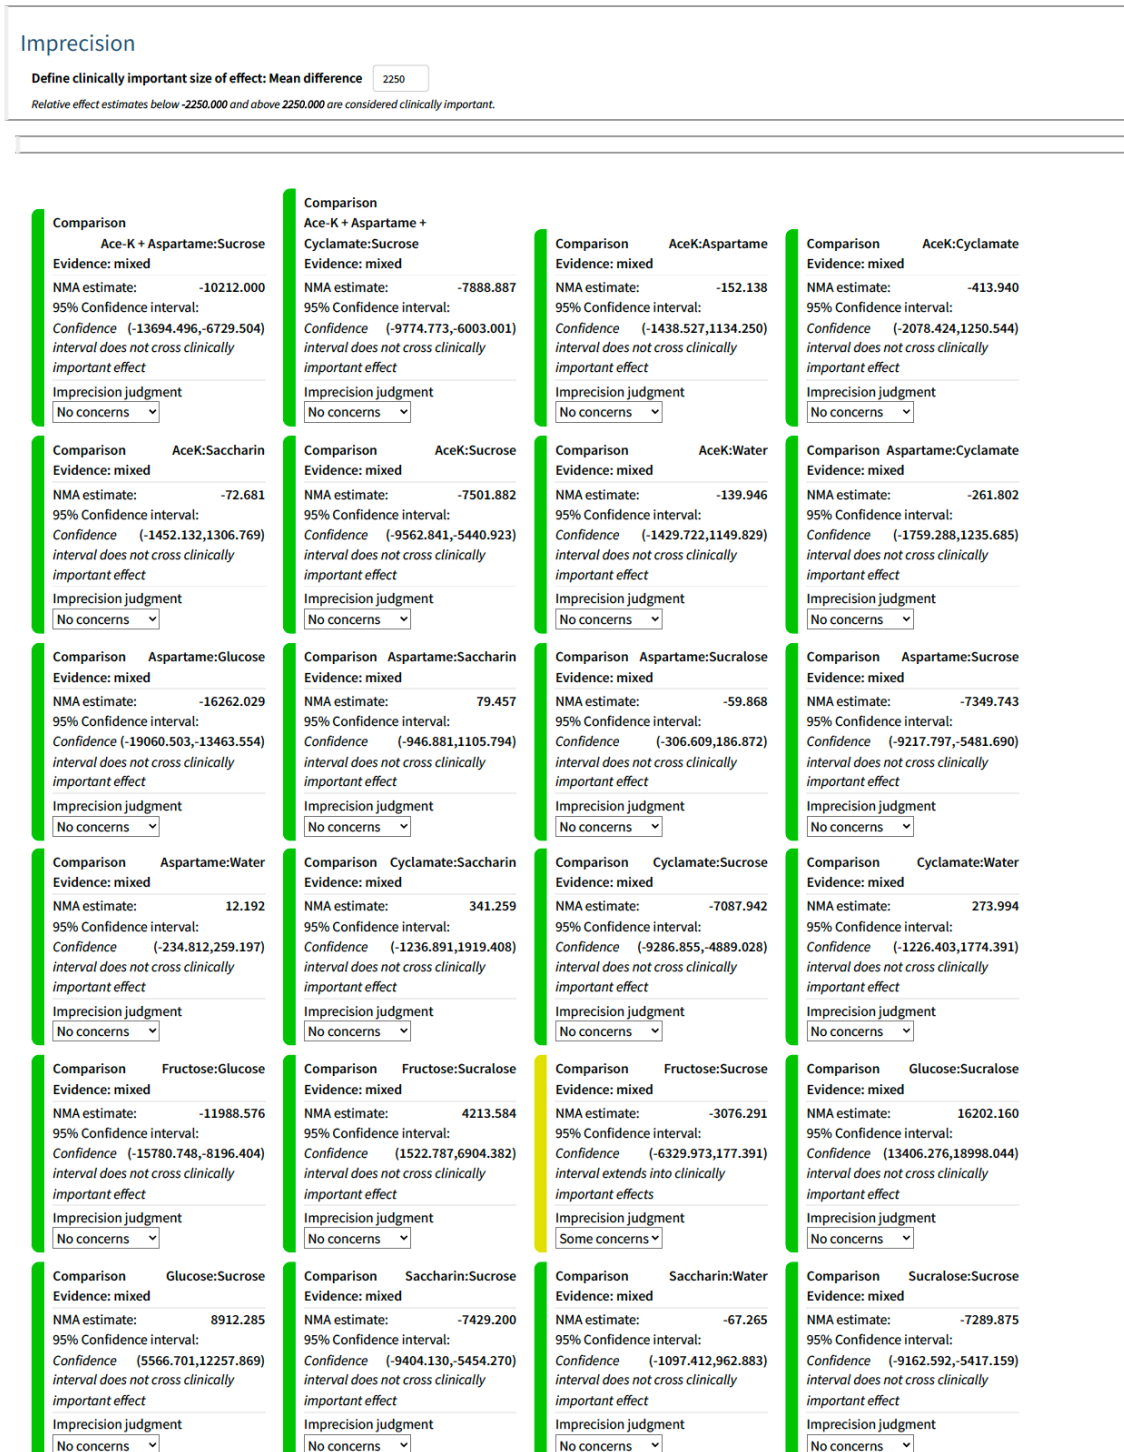



|                                                                                                                                                                                                                                                                                                              |                                                                                                                                                                                                                                                                                          |                                                                                                                                                                                                                                                                                                   |                                                                                                                                                                                                                                                                                                        |
|--------------------------------------------------------------------------------------------------------------------------------------------------------------------------------------------------------------------------------------------------------------------------------------------------------------|------------------------------------------------------------------------------------------------------------------------------------------------------------------------------------------------------------------------------------------------------------------------------------------|---------------------------------------------------------------------------------------------------------------------------------------------------------------------------------------------------------------------------------------------------------------------------------------------------|--------------------------------------------------------------------------------------------------------------------------------------------------------------------------------------------------------------------------------------------------------------------------------------------------------|
| <p>Comparison Sucralose:Water</p> <p>Evidence: mixed</p> <p>NMA estimate: 72.060</p> <p>95% Confidence interval: (-171.078,315.199)</p> <p><i>interval does not cross clinically important effect</i></p> <p>Imprecision judgment</p> <p>No concerns</p>                                                     | <p>Comparison Sucrose:Water</p> <p>Evidence: mixed</p> <p>NMA estimate: 7361.936</p> <p>95% Confidence interval: (5492.058,9231.813)</p> <p><i>interval does not cross clinically important effect</i></p> <p>Imprecision judgment</p> <p>No concerns</p>                                | <p>Comparison Ace-K + Aspartame:Ace-K + Aspartame + Cyclamate</p> <p>Evidence: indirect</p> <p>NMA estimate: -2323.113</p> <p>95% Confidence interval: (-6283.459,1637.233)</p> <p><i>interval extends into clinically important effects</i></p> <p>Imprecision judgment</p> <p>Some concerns</p> | <p>Comparison AceK:Ace-K + Aspartame</p> <p>Evidence: indirect</p> <p>NMA estimate: 2710.118</p> <p>95% Confidence interval: (-1336.526,6756.762)</p> <p><i>interval extends into clinically important effects</i></p> <p>Imprecision judgment</p> <p>Some concerns</p>                                |
| <p>Comparison Ace-K + Aspartame:Aspartame</p> <p>Evidence: indirect</p> <p>NMA estimate: -2862.256</p> <p>95% Confidence interval: (-6814.142,1089.629)</p> <p><i>interval extends into clinically important effects</i></p> <p>Imprecision judgment</p> <p>Some concerns</p>                                | <p>Comparison Ace-K + Aspartame:Cyclamate</p> <p>Evidence: indirect</p> <p>NMA estimate: -3124.058</p> <p>95% Confidence interval: (-7242.674,994.558)</p> <p><i>interval extends into clinically important effects</i></p> <p>Imprecision judgment</p> <p>Some concerns</p>             | <p>Comparison Ace-K + Aspartame:Fructose</p> <p>Evidence: indirect</p> <p>NMA estimate: -7135.709</p> <p>95% Confidence interval: (-11901.654,-2369.765)</p> <p><i>interval does not cross clinically important effect</i></p> <p>Imprecision judgment</p> <p>No concerns</p>                     | <p>Comparison Ace-K + Aspartame:Glucose</p> <p>Evidence: indirect</p> <p>NMA estimate: -19124.285</p> <p>95% Confidence interval: (-23953.437,-14295.133)</p> <p><i>interval does not cross clinically important effect</i></p> <p>Imprecision judgment</p> <p>No concerns</p>                         |
| <p>Comparison Ace-K + Aspartame:Saccharin</p> <p>Evidence: indirect</p> <p>NMA estimate: -2782.800</p> <p>95% Confidence interval: (-6786.314,1220.715)</p> <p><i>interval extends into clinically important effects</i></p> <p>Imprecision judgment</p> <p>Some concerns</p>                                | <p>Comparison Ace-K + Aspartame:Sucralose</p> <p>Evidence: indirect</p> <p>NMA estimate: -2922.125</p> <p>95% Confidence interval: (-6876.217,1031.967)</p> <p><i>interval extends into clinically important effects</i></p> <p>Imprecision judgment</p> <p>Some concerns</p>            | <p>Comparison Evidence: Ace-K + Aspartame:Water</p> <p>Evidence: indirect</p> <p>NMA estimate: -2850.064</p> <p>95% Confidence interval: (-6802.813,1102.684)</p> <p><i>interval extends into clinically important effects</i></p> <p>Imprecision judgment</p> <p>Some concerns</p>               | <p>Comparison AceK:Ace-K + Aspartame + Cyclamate</p> <p>Evidence: indirect</p> <p>NMA estimate: 387.005</p> <p>95% Confidence interval: (-2406.579,3180.590)</p> <p><i>interval extends into clinically important effects in both directions</i></p> <p>Imprecision judgment</p> <p>Major concerns</p> |
| <p>Comparison Ace-K + Aspartame + Cyclamate:Aspartame</p> <p>Evidence: indirect</p> <p>NMA estimate: -539.144</p> <p>95% Confidence interval: (-3193.609,2115.322)</p> <p><i>interval extends into clinically important effects</i></p> <p>Imprecision judgment</p> <p>Some concerns</p>                     | <p>Comparison Ace-K + Aspartame + Cyclamate:Cyclamate</p> <p>Evidence: indirect</p> <p>NMA estimate: -800.945</p> <p>95% Confidence interval: (-3697.803,2095.912)</p> <p><i>interval extends into clinically important effects</i></p> <p>Imprecision judgment</p> <p>Some concerns</p> | <p>Comparison Ace-K + Aspartame + Cyclamate:Fructose</p> <p>Evidence: indirect</p> <p>NMA estimate: -4812.596</p> <p>95% Confidence interval: (-8573.316,-1051.876)</p> <p><i>interval does not cross clinically important effect</i></p> <p>Imprecision judgment</p> <p>No concerns</p>          | <p>Comparison Ace-K + Aspartame + Cyclamate:Glucose</p> <p>Evidence: indirect</p> <p>NMA estimate: -16801.172</p> <p>95% Confidence interval: (-20641.679,-12960.665)</p> <p><i>interval does not cross clinically important effect</i></p> <p>Imprecision judgment</p> <p>No concerns</p>             |
| <p>Comparison Ace-K + Aspartame + Cyclamate:Saccharin</p> <p>Evidence: indirect</p> <p>NMA estimate: -459.687</p> <p>95% Confidence interval: (-3190.421,2271.048)</p> <p><i>interval extends into clinically important effects in both directions</i></p> <p>Imprecision judgment</p> <p>Major concerns</p> | <p>Comparison Ace-K + Aspartame + Cyclamate:Sucralose</p> <p>Evidence: indirect</p> <p>NMA estimate: -599.012</p> <p>95% Confidence interval: (-3256.761,2058.738)</p> <p><i>interval extends into clinically important effects</i></p> <p>Imprecision judgment</p> <p>Some concerns</p> | <p>Comparison Ace-K + Aspartame + Cyclamate:Water</p> <p>Evidence: indirect</p> <p>NMA estimate: -526.951</p> <p>95% Confidence interval: (-3182.701,2128.798)</p> <p><i>interval extends into clinically important effects</i></p> <p>Imprecision judgment</p> <p>Some concerns</p>              | <p>Comparison AceK:Fructose</p> <p>Evidence: indirect</p> <p>NMA estimate: -4425.591</p> <p>95% Confidence interval: (-7409.577,-1441.605)</p> <p><i>interval does not cross clinically important effect</i></p> <p>Imprecision judgment</p> <p>No concerns</p>                                        |
| <p>Comparison AceK:Glucose</p> <p>Evidence: indirect</p> <p>NMA estimate: -16414.167</p> <p>95% Confidence interval: (-19489.147,-13339.187)</p> <p><i>interval does not cross clinically important effect</i></p> <p>Imprecision judgment</p> <p>No concerns</p>                                            | <p>Comparison AceK:Sucralose</p> <p>Evidence: indirect</p> <p>NMA estimate: -212.007</p> <p>95% Confidence interval: (-1510.784,1086.771)</p> <p><i>interval does not cross clinically important effect</i></p> <p>Imprecision judgment</p> <p>No concerns</p>                           | <p>Comparison Aspartame:Fructose</p> <p>Evidence: indirect</p> <p>NMA estimate: -4273.453</p> <p>95% Confidence interval: (-6974.848,-1572.057)</p> <p><i>interval does not cross clinically important effect</i></p> <p>Imprecision judgment</p> <p>No concerns</p>                              | <p>Comparison Cyclamate:Fructose</p> <p>Evidence: indirect</p> <p>NMA estimate: -4011.651</p> <p>95% Confidence interval: (-7092.534,-930.768)</p> <p><i>interval does not cross clinically important effect</i></p> <p>Imprecision judgment</p> <p>No concerns</p>                                    |

(continued on next page)



|                                                                                                                                                                                                                                                                                                                                |                                                                                                                                                                                                                                                                                                                            |                                                                                                                                                                                                                                                                                                                            |                                                                                                                                                                                                                                                                                                                       |
|--------------------------------------------------------------------------------------------------------------------------------------------------------------------------------------------------------------------------------------------------------------------------------------------------------------------------------|----------------------------------------------------------------------------------------------------------------------------------------------------------------------------------------------------------------------------------------------------------------------------------------------------------------------------|----------------------------------------------------------------------------------------------------------------------------------------------------------------------------------------------------------------------------------------------------------------------------------------------------------------------------|-----------------------------------------------------------------------------------------------------------------------------------------------------------------------------------------------------------------------------------------------------------------------------------------------------------------------|
| <b>Comparison</b> Cyclamate:Glucose<br><b>Evidence:</b> indirect<br><b>NMA estimate:</b> -16000.227<br><b>95% Confidence interval:</b><br><b>Confidence</b> (-19169.323,-12831.130)<br><i>interval does not cross clinically important effect</i><br><b>Imprecision judgment</b><br><input type="button" value="No concerns"/> | <b>Comparison</b> Cyclamate:Sucralose<br><b>Evidence:</b> indirect<br><b>NMA estimate:</b> 201.934<br><b>95% Confidence interval:</b><br><b>Confidence</b> (-1306.209,1710.076)<br><i>interval does not cross clinically important effect</i><br><b>Imprecision judgment</b><br><input type="button" value="No concerns"/> | <b>Comparison</b> Fructose:Saccharin<br><b>Evidence:</b> indirect<br><b>NMA estimate:</b> 4352.909<br><b>95% Confidence interval:</b><br><b>Confidence</b> (1470.438,7235.381)<br><i>interval does not cross clinically important effect</i><br><b>Imprecision judgment</b><br><input type="button" value="No concerns"/>  | <b>Comparison</b> Fructose:Water<br><b>Evidence:</b> indirect<br><b>NMA estimate:</b> 4285.645<br><b>95% Confidence interval:</b><br><b>Confidence</b> (1584.354,6986.936)<br><i>interval does not cross clinically important effect</i><br><b>Imprecision judgment</b><br><input type="button" value="No concerns"/> |
| <b>Comparison</b> Glucose:Saccharin<br><b>Evidence:</b> indirect<br><b>NMA estimate:</b> 16341.486<br><b>95% Confidence interval:</b><br><b>Confidence</b> (13365.273,19317.698)<br><i>interval does not cross clinically important effect</i><br><b>Imprecision judgment</b><br><input type="button" value="No concerns"/>    | <b>Comparison</b> Glucose:Water<br><b>Evidence:</b> indirect<br><b>NMA estimate:</b> 16274.221<br><b>95% Confidence interval:</b><br><b>Confidence</b> (13471.874,19076.568)<br><i>interval does not cross clinically important effect</i><br><b>Imprecision judgment</b><br><input type="button" value="No concerns"/>    | <b>Comparison</b> Saccharin:Sucralose<br><b>Evidence:</b> indirect<br><b>NMA estimate:</b> -139.325<br><b>95% Confidence interval:</b><br><b>Confidence</b> (-1181.202,902.552)<br><i>interval does not cross clinically important effect</i><br><b>Imprecision judgment</b><br><input type="button" value="No concerns"/> |                                                                                                                                                                                                                                                                                                                       |

Relative effect estimates below -2250.0 and above 2250.0 pmol\*min/L (minimal important difference; MID) were considered clinically important. Judgements for IMPRECISION were assigned by the CiNEMA algorithm (27, 28). There is no general consensus on a clinically important size difference for 2-hour blood insulin incremental area under the curve (iAUC). Health Canada considers a 20% reduction in glucose iAUC to be the minimum physiologically relevant difference as per “Guideline Concerning the Safety and Physiological Effects of Novel Fibre Sources and Food Products Containing Them” (29). Extrapolating the 20% threshold in glucose iAUC, we calculated the MID of insulin iAUC by taking 20% of 11250 pmol\*mins/L which is the median of insulin iAUC in participants with type 2 diabetes (~6200 pmol\*mins/L) and healthy participants (~16300 pmol\*mins/L) after a 75-g oral glucose tolerance test (32-34).



**Figure S17.** CINeMA output for the HETEROGENEITY domain of UNCOUPLING INTERVENTIONS evaluating the effect of non-nutritive sweetened beverages (NNS beverages) sweetened single or blends of non-nutritive sweeteners (NNS), water, and sugar-sweetened beverages (SSBs) sweetened with caloric sweeteners on postprandial blood INSULIN response in HEALTHY participants

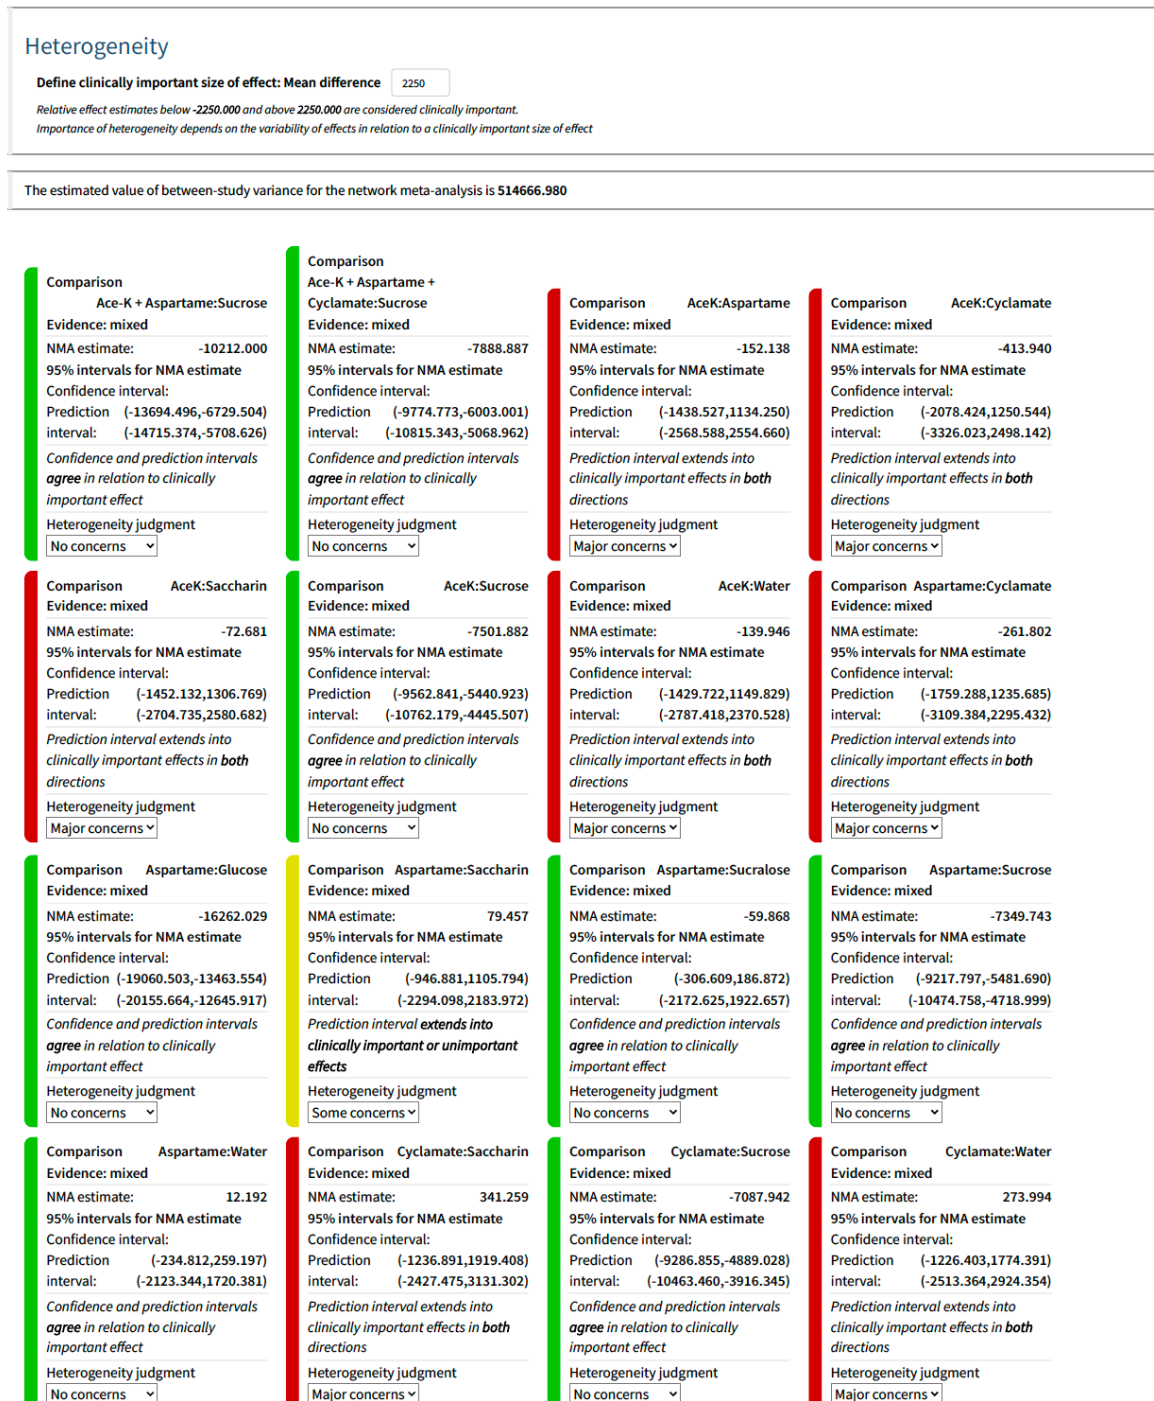

(continued on next page)



|                                                                                                                                                                                                                                                                                                                                                                                   |                                                                                                                                                                                                                                                                                                                                                                                   |                                                                                                                                                                                                                                                                                                                                                                                                       |                                                                                                                                                                                                                                                                                                                                                                                              |
|-----------------------------------------------------------------------------------------------------------------------------------------------------------------------------------------------------------------------------------------------------------------------------------------------------------------------------------------------------------------------------------|-----------------------------------------------------------------------------------------------------------------------------------------------------------------------------------------------------------------------------------------------------------------------------------------------------------------------------------------------------------------------------------|-------------------------------------------------------------------------------------------------------------------------------------------------------------------------------------------------------------------------------------------------------------------------------------------------------------------------------------------------------------------------------------------------------|----------------------------------------------------------------------------------------------------------------------------------------------------------------------------------------------------------------------------------------------------------------------------------------------------------------------------------------------------------------------------------------------|
| <p>Comparison Fructose:Glucose<br/>Evidence: mixed</p> <p>NMA estimate: -11988.576<br/>95% intervals for NMA estimate<br/>Confidence interval:<br/>Prediction (-15780.748,-8196.404)<br/>interval: (-16802.681,-7223.754)</p> <p>Confidence and prediction intervals <b>agree</b> in relation to clinically important effect</p> <p>Heterogeneity judgment<br/>No concerns</p>    | <p>Comparison Fructose:Sucralose<br/>Evidence: mixed</p> <p>NMA estimate: 4213.584<br/>95% intervals for NMA estimate<br/>Confidence interval:<br/>Prediction (1522.787,6904.382)<br/>interval: (523.537,8001.642)</p> <p>Confidence and prediction intervals <b>agree</b> in relation to clinically important effect</p> <p>Heterogeneity judgment<br/>No concerns</p>           | <p>Comparison Fructose:Sucrose<br/>Evidence: mixed</p> <p>NMA estimate: -3076.291<br/>95% intervals for NMA estimate<br/>Confidence interval:<br/>Prediction (-6329.973,177.391)<br/>interval: (-7616.677,1198.067)</p> <p>Confidence and prediction intervals <b>agree</b> in relation to clinically important effect</p> <p>Heterogeneity judgment<br/>No concerns</p>                              | <p>Comparison Glucose:Sucralose<br/>Evidence: mixed</p> <p>NMA estimate: 16202.160<br/>95% intervals for NMA estimate<br/>Confidence interval:<br/>Prediction (13406.276,18998.044)<br/>interval: (12560.371,19991.243)</p> <p>Confidence and prediction intervals <b>agree</b> in relation to clinically important effect</p> <p>Heterogeneity judgment<br/>No concerns</p>                 |
| <p>Comparison Glucose:Sucrose<br/>Evidence: mixed</p> <p>NMA estimate: 8912.285<br/>95% intervals for NMA estimate<br/>Confidence interval:<br/>Prediction (5566.701,12257.869)<br/>interval: (4473.325,13134.499)</p> <p>Confidence and prediction intervals <b>agree</b> in relation to clinically important effect</p> <p>Heterogeneity judgment<br/>No concerns</p>           | <p>Comparison Saccharin:Sucrose<br/>Evidence: mixed</p> <p>NMA estimate: -7429.200<br/>95% intervals for NMA estimate<br/>Confidence interval:<br/>Prediction (-9404.130,-5454.270)<br/>interval: (-10547.703,-4535.929)</p> <p>Confidence and prediction intervals <b>agree</b> in relation to clinically important effect</p> <p>Heterogeneity judgment<br/>No concerns</p>     | <p>Comparison Saccharin:Water<br/>Evidence: mixed</p> <p>NMA estimate: -67.265<br/>95% intervals for NMA estimate<br/>Confidence interval:<br/>Prediction (-1097.412,962.883)<br/>interval: (-2404.156,2111.319)</p> <p>Prediction interval <b>extends into clinically important or unimportant effects</b></p> <p>Heterogeneity judgment<br/>Some concerns</p>                                       | <p>Comparison Sucralose:Sucrose<br/>Evidence: mixed</p> <p>NMA estimate: -7289.875<br/>95% intervals for NMA estimate<br/>Confidence interval:<br/>Prediction (-9162.592,-5417.159)<br/>interval: (-10428.627,-4515.162)</p> <p>Confidence and prediction intervals <b>agree</b> in relation to clinically important effect</p> <p>Heterogeneity judgment<br/>No concerns</p>                |
| <p>Comparison Sucralose:Water<br/>Evidence: mixed</p> <p>NMA estimate: 72.060<br/>95% intervals for NMA estimate<br/>Confidence interval:<br/>Prediction (-171.078,315.199)<br/>interval: (-2033.877,1880.883)</p> <p>Confidence and prediction intervals <b>agree</b> in relation to clinically important effect</p> <p>Heterogeneity judgment<br/>No concerns</p>               | <p>Comparison Sucrose:Water<br/>Evidence: mixed</p> <p>NMA estimate: 7361.936<br/>95% intervals for NMA estimate<br/>Confidence interval:<br/>Prediction (5492.058,9231.813)<br/>interval: (4515.164,10275.630)</p> <p>Confidence and prediction intervals <b>agree</b> in relation to clinically important effect</p> <p>Heterogeneity judgment<br/>No concerns</p>              | <p>Comparison Ace-K + Aspartame:Ace-K + Aspartame + Cyclamate<br/>Evidence: indirect</p> <p>NMA estimate: -2323.113<br/>95% intervals for NMA estimate<br/>Confidence interval:<br/>Prediction (-6283.459,1637.233)<br/>interval: (-7373.021,2833.326)</p> <p>Prediction interval <b>extends into clinically important or unimportant effects</b></p> <p>Heterogeneity judgment<br/>Some concerns</p> | <p>Comparison Evidence: AceK:Ace-K + Aspartame indirect</p> <p>NMA estimate: 2710.118<br/>95% intervals for NMA estimate<br/>Confidence interval:<br/>Prediction (-1336.526,6756.762)<br/>interval: (-2660.831,7877.146)</p> <p>Prediction interval <b>extends into clinically important or unimportant effects</b></p> <p>Heterogeneity judgment<br/>Some concerns</p>                      |
| <p>Comparison Ace-K + Aspartame:Aspartame<br/>Evidence: indirect</p> <p>NMA estimate: -2862.256<br/>95% intervals for NMA estimate<br/>Confidence interval:<br/>Prediction (-6814.142,1089.629)<br/>interval: (-7720.936,2490.693)</p> <p>Prediction interval <b>extends into clinically important or unimportant effects</b></p> <p>Heterogeneity judgment<br/>Some concerns</p> | <p>Comparison Ace-K + Aspartame:Cyclamate<br/>Evidence: indirect</p> <p>NMA estimate: -3124.058<br/>95% intervals for NMA estimate<br/>Confidence interval:<br/>Prediction (-7242.674,994.558)<br/>interval: (-8360.949,2316.754)</p> <p>Prediction interval <b>extends into clinically important or unimportant effects</b></p> <p>Heterogeneity judgment<br/>Some concerns</p>  | <p>Comparison Ace-K + Aspartame:Fructose<br/>Evidence: indirect</p> <p>NMA estimate: -7135.709<br/>95% intervals for NMA estimate<br/>Confidence interval:<br/>Prediction (-11901.654,-2369.765)<br/>interval: (-13102.866,-902.524)</p> <p>Confidence and prediction intervals <b>agree</b> in relation to clinically important effect</p> <p>Heterogeneity judgment<br/>No concerns</p>             | <p>Comparison Ace-K + Aspartame:Glucose<br/>Evidence: indirect</p> <p>NMA estimate: -19124.285<br/>95% intervals for NMA estimate<br/>Confidence interval:<br/>Prediction (-23953.437,-14295.133)<br/>interval: (-25060.839,-12970.986)</p> <p>Confidence and prediction intervals <b>agree</b> in relation to clinically important effect</p> <p>Heterogeneity judgment<br/>No concerns</p> |
| <p>Comparison Ace-K + Aspartame:Saccharin<br/>Evidence: indirect</p> <p>NMA estimate: -2782.800<br/>95% intervals for NMA estimate<br/>Confidence interval:<br/>Prediction (-6786.314,1220.715)<br/>interval: (-7849.230,2508.862)</p> <p>Prediction interval <b>extends into clinically important or unimportant effects</b></p> <p>Heterogeneity judgment<br/>Some concerns</p> | <p>Comparison Ace-K + Aspartame:Sucralose<br/>Evidence: indirect</p> <p>NMA estimate: -2922.125<br/>95% intervals for NMA estimate<br/>Confidence interval:<br/>Prediction (-6876.217,1031.967)<br/>interval: (-7890.777,2410.566)</p> <p>Prediction interval <b>extends into clinically important or unimportant effects</b></p> <p>Heterogeneity judgment<br/>Some concerns</p> | <p>Comparison Evidence: Ace-K + Aspartame:Water indirect</p> <p>NMA estimate: -2850.064<br/>95% intervals for NMA estimate<br/>Confidence interval:<br/>Prediction (-6802.813,1102.684)<br/>interval: (-7923.745,2290.539)</p> <p>Prediction interval <b>extends into clinically important or unimportant effects</b></p> <p>Heterogeneity judgment<br/>Some concerns</p>                             | <p>Comparison AceK:Ace-K + Aspartame + Cyclamate<br/>Evidence: indirect</p> <p>NMA estimate: 387.005<br/>95% intervals for NMA estimate<br/>Confidence interval:<br/>Prediction (-2406.579,3180.590)<br/>interval: (-3628.690,4305.310)</p> <p>Confidence and prediction intervals <b>agree</b> in relation to clinically important effect</p> <p>Heterogeneity judgment<br/>No concerns</p> |

(continued on next page)



|                                                                                                                                                                                                                                                                                                                                                                                                            |                                                                                                                                                                                                                                                                                                                                                                                                      |                                                                                                                                                                                                                                                                                                                                                                                                      |                                                                                                                                                                                                                                                                                                                                                                                                                  |
|------------------------------------------------------------------------------------------------------------------------------------------------------------------------------------------------------------------------------------------------------------------------------------------------------------------------------------------------------------------------------------------------------------|------------------------------------------------------------------------------------------------------------------------------------------------------------------------------------------------------------------------------------------------------------------------------------------------------------------------------------------------------------------------------------------------------|------------------------------------------------------------------------------------------------------------------------------------------------------------------------------------------------------------------------------------------------------------------------------------------------------------------------------------------------------------------------------------------------------|------------------------------------------------------------------------------------------------------------------------------------------------------------------------------------------------------------------------------------------------------------------------------------------------------------------------------------------------------------------------------------------------------------------|
| <p>Comparison<br/>Ace-K + Aspartame +<br/>Cyclamate:Aspartame<br/>Evidence: indirect</p> <p>NMA estimate: -539.144<br/>95% intervals for NMA estimate<br/>Confidence interval:<br/>Prediction (-3193.609,2115.322)<br/>interval: (-4092.833,3402.284)</p> <p>Prediction interval <i>extends into clinically important or unimportant effects</i></p> <p>Heterogeneity judgment<br/>Some concerns</p>       | <p>Comparison<br/>Ace-K + Aspartame +<br/>Cyclamate:Cyclamate<br/>Evidence: indirect</p> <p>NMA estimate: -800.945<br/>95% intervals for NMA estimate<br/>Confidence interval:<br/>Prediction (-3697.803,2095.912)<br/>interval: (-4811.583,3307.082)</p> <p>Prediction interval <i>extends into clinically important or unimportant effects</i></p> <p>Heterogeneity judgment<br/>Some concerns</p> | <p>Comparison<br/>Ace-K + Aspartame +<br/>Cyclamate:Fructose<br/>Evidence: indirect</p> <p>NMA estimate: -4812.596<br/>95% intervals for NMA estimate<br/>Confidence interval:<br/>Prediction (-8573.316,-1051.876)<br/>interval: (-9751.506,285.810)</p> <p>Prediction interval <i>extends into clinically important or unimportant effects</i></p> <p>Heterogeneity judgment<br/>Some concerns</p> | <p>Comparison<br/>Ace-K + Aspartame +<br/>Cyclamate:Glucose<br/>Evidence: indirect</p> <p>NMA estimate: -16801.172<br/>95% intervals for NMA estimate<br/>Confidence interval:<br/>Prediction (-20641.679,-12960.665)<br/>interval: (-21697.427,-11794.703)</p> <p>Confidence and prediction intervals <i>agree in relation to clinically important effect</i></p> <p>Heterogeneity judgment<br/>No concerns</p> |
| <p>Comparison<br/>Ace-K + Aspartame +<br/>Cyclamate:Saccharin<br/>Evidence: indirect</p> <p>NMA estimate: -459.687<br/>95% intervals for NMA estimate<br/>Confidence interval:<br/>Prediction (-3190.421,2271.048)<br/>interval: (-4247.071,3446.397)</p> <p>Confidence and prediction intervals <i>agree in relation to clinically important effect</i></p> <p>Heterogeneity judgment<br/>No concerns</p> | <p>Comparison<br/>Ace-K + Aspartame +<br/>Cyclamate:Sucralose<br/>Evidence: indirect</p> <p>NMA estimate: -599.012<br/>95% intervals for NMA estimate<br/>Confidence interval:<br/>Prediction (-3256.761,2058.738)<br/>interval: (-4278.705,3338.189)</p> <p>Prediction interval <i>extends into clinically important or unimportant effects</i></p> <p>Heterogeneity judgment<br/>Some concerns</p> | <p>Comparison<br/>Ace-K + Aspartame +<br/>Cyclamate:Water<br/>Evidence: indirect</p> <p>NMA estimate: -526.951<br/>95% intervals for NMA estimate<br/>Confidence interval:<br/>Prediction (-3182.701,2128.798)<br/>interval: (-4296.122,3202.611)</p> <p>Prediction interval <i>extends into clinically important or unimportant effects</i></p> <p>Heterogeneity judgment<br/>Some concerns</p>     | <p>Comparison<br/>AceK:Fructose<br/>Evidence: indirect</p> <p>NMA estimate: -4425.591<br/>95% intervals for NMA estimate<br/>Confidence interval:<br/>Prediction (-7409.577,-1441.605)<br/>interval: (-8710.891,-78.184)</p> <p>Confidence and prediction intervals <i>agree in relation to clinically important effect</i></p> <p>Heterogeneity judgment<br/>No concerns</p>                                    |
| <p>Comparison<br/>AceK:Glucose<br/>Evidence: indirect</p> <p>NMA estimate: -16414.167<br/>95% intervals for NMA estimate<br/>Confidence interval:<br/>Prediction (-19489.147,-13339.187)<br/>interval: (-20605.599,-12209.911)</p> <p>Confidence and prediction intervals <i>agree in relation to clinically important effect</i></p> <p>Heterogeneity judgment<br/>No concerns</p>                        | <p>Comparison<br/>AceK:Sucralose<br/>Evidence: indirect</p> <p>NMA estimate: -212.007<br/>95% intervals for NMA estimate<br/>Confidence interval:<br/>Prediction (-1510.784,1086.771)<br/>interval: (-2863.423,2599.527)</p> <p>Prediction interval <i>extends into clinically important effects in both directions</i></p> <p>Heterogeneity judgment<br/>Major concerns</p>                         | <p>Comparison<br/>Aspartame:Fructose<br/>Evidence: indirect</p> <p>NMA estimate: -4273.453<br/>95% intervals for NMA estimate<br/>Confidence interval:<br/>Prediction (-6974.848,-1572.057)<br/>interval: (-8314.656,-460.492)</p> <p>Confidence and prediction intervals <i>agree in relation to clinically important effect</i></p> <p>Heterogeneity judgment<br/>No concerns</p>                  | <p>Comparison<br/>Cyclamate:Fructose<br/>Evidence: indirect</p> <p>NMA estimate: -4011.651<br/>95% intervals for NMA estimate<br/>Confidence interval:<br/>Prediction (-7092.534,-930.768)<br/>interval: (-8381.961,420.766)</p> <p>Prediction interval <i>extends into clinically important or unimportant effects</i></p> <p>Heterogeneity judgment<br/>Some concerns</p>                                      |
| <p>Comparison<br/>Cyclamate:Glucose<br/>Evidence: indirect</p> <p>NMA estimate: -16000.227<br/>95% intervals for NMA estimate<br/>Confidence interval:<br/>Prediction (-19169.323,-12831.130)<br/>interval: (-20279.020,-11708.609)</p> <p>Confidence and prediction intervals <i>agree in relation to clinically important effect</i></p> <p>Heterogeneity judgment<br/>No concerns</p>                   | <p>Comparison<br/>Cyclamate:Sucralose<br/>Evidence: indirect</p> <p>NMA estimate: 201.934<br/>95% intervals for NMA estimate<br/>Confidence interval:<br/>Prediction (-1306.209,1710.076)<br/>interval: (-2581.930,3145.914)</p> <p>Prediction interval <i>extends into clinically important effects in both directions</i></p> <p>Heterogeneity judgment<br/>Major concerns</p>                     | <p>Comparison<br/>Fructose:Saccharin<br/>Evidence: indirect</p> <p>NMA estimate: 4352.909<br/>95% intervals for NMA estimate<br/>Confidence interval:<br/>Prediction (1470.438,7235.381)<br/>interval: (192.725,8472.297)</p> <p>Confidence and prediction intervals <i>agree in relation to clinically important effect</i></p> <p>Heterogeneity judgment<br/>No concerns</p>                       | <p>Comparison<br/>Fructose:Water<br/>Evidence: indirect</p> <p>NMA estimate: 4285.645<br/>95% intervals for NMA estimate<br/>Confidence interval:<br/>Prediction (1584.354,6986.936)<br/>interval: (294.621,8077.563)</p> <p>Confidence and prediction intervals <i>agree in relation to clinically important effect</i></p> <p>Heterogeneity judgment<br/>No concerns</p>                                       |
| <p>Comparison<br/>Glucose:Saccharin<br/>Evidence: indirect</p> <p>NMA estimate: 16341.486<br/>95% intervals for NMA estimate<br/>Confidence interval:<br/>Prediction (13365.273,19317.698)<br/>interval: (12332.184,20359.272)</p> <p>Confidence and prediction intervals <i>agree in relation to clinically important effect</i></p> <p>Heterogeneity judgment<br/>No concerns</p>                        | <p>Comparison<br/>Glucose:Water<br/>Evidence: indirect</p> <p>NMA estimate: 16274.221<br/>95% intervals for NMA estimate<br/>Confidence interval:<br/>Prediction (13471.874,19076.568)<br/>interval: (12409.777,19988.842)</p> <p>Confidence and prediction intervals <i>agree in relation to clinically important effect</i></p> <p>Heterogeneity judgment<br/>No concerns</p>                      | <p>Comparison<br/>Saccharin:Sucralose<br/>Evidence: indirect</p> <p>NMA estimate: -139.325<br/>95% intervals for NMA estimate<br/>Confidence interval:<br/>Prediction (-1181.202,902.552)<br/>interval: (-2506.110,2366.267)</p> <p>Prediction interval <i>extends into clinically important effects in both directions</i></p> <p>Heterogeneity judgment<br/>Major concerns</p>                     |                                                                                                                                                                                                                                                                                                                                                                                                                  |

Judgements for were assigned by the CiNEMA algorithm (27, 28).



**Figure S18.** CINeMA output for the INCOHERENCE domain of UNCOUPLING INTERVENTIONS evaluating the effect of non-nutritive sweetened beverages (NNS beverages) sweetened single or blends of non-nutritive sweeteners (NNS), water, and sugar-sweetened beverages (SSBs) sweetened with caloric sweeteners on postprandial blood INSULIN response in HEALTHY participants

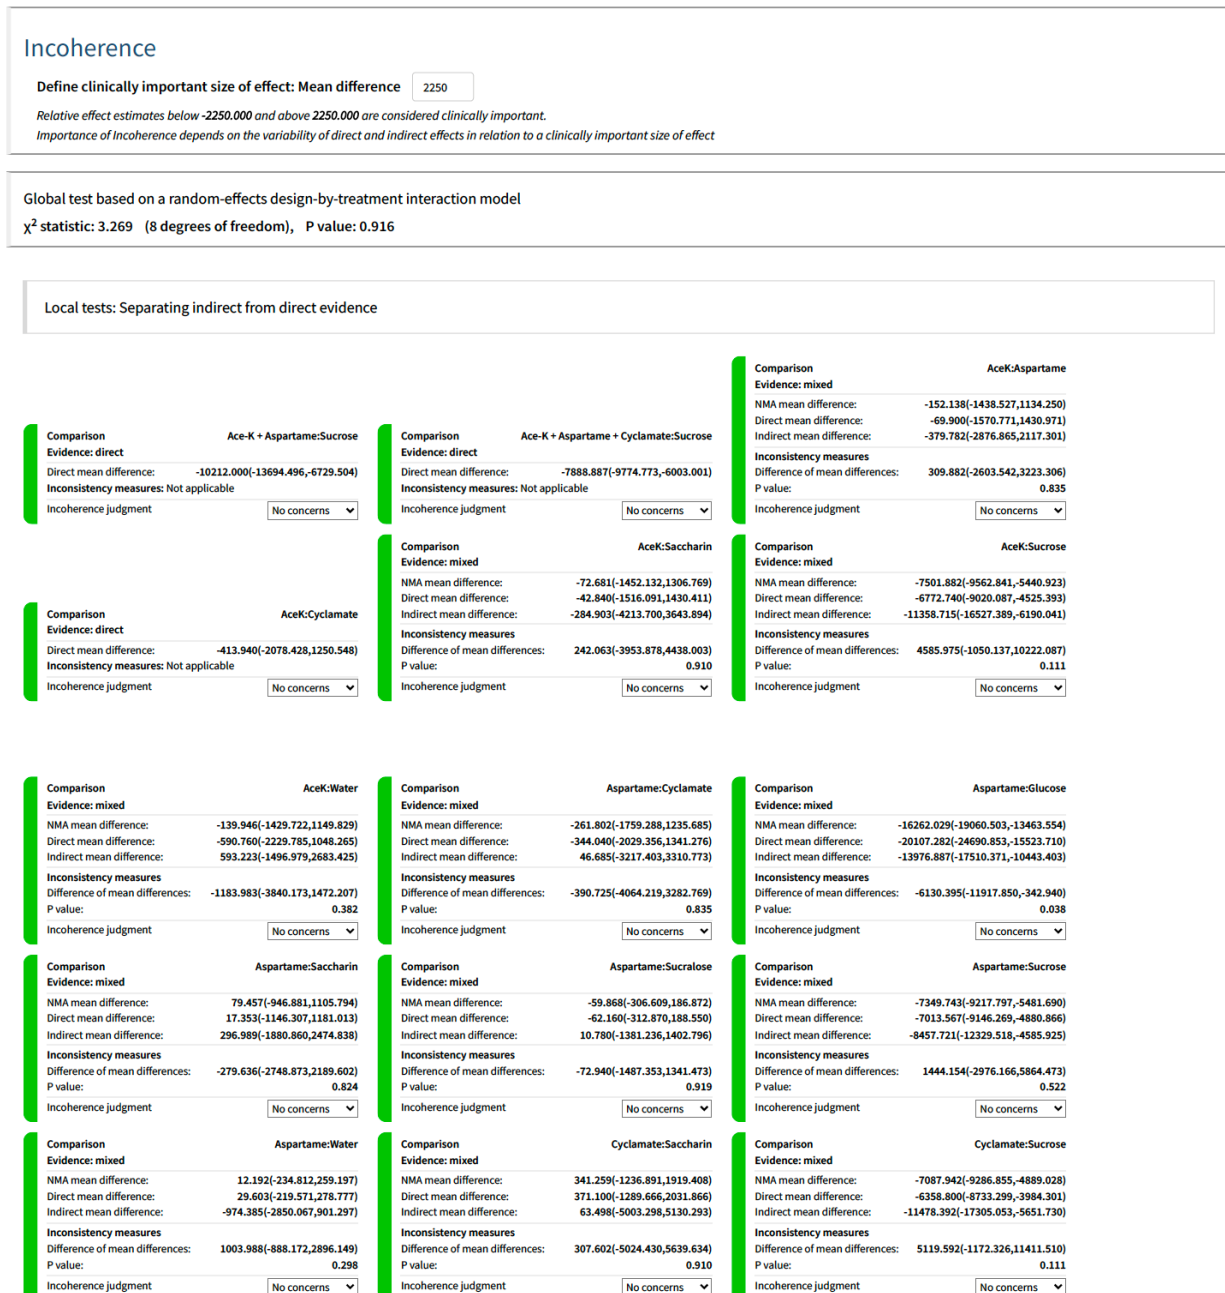

(continued on next page)



|                                                                                                                                                                                                                                                                                                                                                                                                                  |                                                                                                                                                                                                                                                                                                                                                                                                                      |                                                                                                                                                                                                                                                                                                                                                                                                                  |
|------------------------------------------------------------------------------------------------------------------------------------------------------------------------------------------------------------------------------------------------------------------------------------------------------------------------------------------------------------------------------------------------------------------|----------------------------------------------------------------------------------------------------------------------------------------------------------------------------------------------------------------------------------------------------------------------------------------------------------------------------------------------------------------------------------------------------------------------|------------------------------------------------------------------------------------------------------------------------------------------------------------------------------------------------------------------------------------------------------------------------------------------------------------------------------------------------------------------------------------------------------------------|
| <b>Comparison</b><br><b>Evidence: mixed</b><br>NMA mean difference: 273.994(-1226.403,1774.391)<br>Direct mean difference: -176.820(-1986.262,1632.622)<br>Indirect mean difference: 1266.171(-1418.180,3950.523)<br><b>Inconsistency measures</b><br>Difference of mean differences: -1442.991(-4680.247,1794.264)<br>P value: 0.382<br>Incoherence judgment: <input type="button" value="No concerns"/>        | <b>Comparison</b><br><b>Evidence: mixed</b><br>NMA mean difference: -11988.576(-15780.748,-8196.404)<br>Direct mean difference: -9812.530(-14125.289,-5499.771)<br>Indirect mean difference: -19404.153(-27365.748,-11442.559)<br><b>Inconsistency measures</b><br>Difference of mean differences: 9591.623(536.963,18646.284)<br>P value: 0.038<br>Incoherence judgment: <input type="button" value="No concerns"/> | <b>Comparison</b><br><b>Evidence: mixed</b><br>NMA mean difference: 4213.584(1522.787,6904.382)<br>Direct mean difference: 4185.320(1490.947,6879.693)<br>Indirect mean difference: 14755.722(-37280.641,66792.085)<br><b>Inconsistency measures</b><br>Difference of mean differences: -10570.402(-62676.473,41535.670)<br>P value: 0.691<br>Incoherence judgment: <input type="button" value="No concerns"/>   |
| <b>Comparison</b><br><b>Evidence: mixed</b><br>NMA mean difference: -3076.291(-6329.973,177.391)<br>Direct mean difference: -6118.220(-11581.148,-655.292)<br>Indirect mean difference: -1404.068(-5454.510,2646.374)<br><b>Inconsistency measures</b><br>Difference of mean differences: -4714.152(-11514.862,2086.558)<br>P value: 0.174<br>Incoherence judgment: <input type="button" value="No concerns"/>   | <b>Comparison</b><br><b>Evidence: mixed</b><br>NMA mean difference: 16202.160(13406.276,18998.044)<br>Direct mean difference: 13997.850(10471.257,17524.443)<br>Indirect mean difference: 19931.674(15344.448,24518.900)<br><b>Inconsistency measures</b><br>Difference of mean differences: -5933.824(-11719.971,-147.677)<br>P value: 0.044<br>Incoherence judgment: <input type="button" value="No concerns"/>    | <b>Comparison</b><br><b>Evidence: mixed</b><br>NMA mean difference: 8912.285(5566.701,12257.869)<br>Direct mean difference: 3694.310(-2223.527,9612.147)<br>Indirect mean difference: 11363.304(7307.377,15419.231)<br><b>Inconsistency measures</b><br>Difference of mean differences: -7668.994(-14843.347,-494.642)<br>P value: 0.036<br>Incoherence judgment: <input type="button" value="Some concerns"/>   |
| <b>Comparison</b><br><b>Evidence: mixed</b><br>NMA mean difference: -7429.200(-9404.130,-5454.270)<br>Direct mean difference: -6729.900(-8974.492,-4485.308)<br>Indirect mean difference: -9826.303(-13982.045,-5670.561)<br><b>Inconsistency measures</b><br>Difference of mean differences: 3096.403(-1626.772,7819.578)<br>P value: 0.199<br>Incoherence judgment: <input type="button" value="No concerns"/> | <b>Comparison</b><br><b>Evidence: mixed</b><br>NMA mean difference: -67.265(-1097.412,962.883)<br>Direct mean difference: -321.082(-1572.876,930.711)<br>Indirect mean difference: 465.292(-1347.939,2278.523)<br><b>Inconsistency measures</b><br>Difference of mean differences: -786.374(-2989.734,1416.985)<br>P value: 0.484<br>Incoherence judgment: <input type="button" value="No concerns"/>                | <b>Comparison</b><br><b>Evidence: mixed</b><br>NMA mean difference: -7289.875(-9162.592,-5417.159)<br>Direct mean difference: -9979.606(-13849.114,-6110.099)<br>Indirect mean difference: -6467.180(-8607.217,-4327.143)<br><b>Inconsistency measures</b><br>Difference of mean differences: -3512.427(-7934.287,909.434)<br>P value: 0.119<br>Incoherence judgment: <input type="button" value="No concerns"/> |
| <b>Comparison</b><br><b>Evidence: mixed</b><br>NMA mean difference: 72.060(-171.078,315.199)<br>Direct mean difference: 78.873(-165.877,323.623)<br>Indirect mean difference: -440.272(-2562.704,1682.160)<br><b>Inconsistency measures</b><br>Difference of mean differences: 519.145(-1617.352,2655.643)<br>P value: 0.634<br>Incoherence judgment: <input type="button" value="No concerns"/>                 | <b>Comparison</b><br><b>Evidence: mixed</b><br>NMA mean difference: 7361.936(5492.058,9231.813)<br>Direct mean difference: 6583.525(4372.751,8794.299)<br>Indirect mean difference: 9318.438(5813.499,12823.378)<br><b>Inconsistency measures</b><br>Difference of mean differences: -2734.913(-6878.840,1409.013)<br>P value: 0.196<br>Incoherence judgment: <input type="button" value="No concerns"/>             | <b>Comparison</b><br><b>Evidence: indirect</b><br>Indirect mean difference: -2323.113(-6283.459,1637.233)<br><b>Inconsistency measures: Not applicable</b><br>Incoherence judgment: <input type="button" value="No concerns"/>                                                                                                                                                                                   |
| <b>Comparison</b><br><b>Evidence: indirect</b><br>Indirect mean difference: 2710.118(-1336.526,6756.762)<br><b>Inconsistency measures: Not applicable</b><br>Incoherence judgment: <input type="button" value="No concerns"/>                                                                                                                                                                                    | <b>Comparison</b><br><b>Evidence: indirect</b><br>Indirect mean difference: -2862.256(-6814.142,1089.629)<br><b>Inconsistency measures: Not applicable</b><br>Incoherence judgment: <input type="button" value="No concerns"/>                                                                                                                                                                                       | <b>Comparison</b><br><b>Evidence: indirect</b><br>Indirect mean difference: -3124.058(-7242.674,994.558)<br><b>Inconsistency measures: Not applicable</b><br>Incoherence judgment: <input type="button" value="No concerns"/>                                                                                                                                                                                    |
| <b>Comparison</b><br><b>Evidence: indirect</b><br>Indirect mean difference: -7135.709(-11901.654,-2369.765)<br><b>Inconsistency measures: Not applicable</b><br>Incoherence judgment: <input type="button" value="No concerns"/>                                                                                                                                                                                 | <b>Comparison</b><br><b>Evidence: indirect</b><br>Indirect mean difference: -19124.285(-23953.437,-14295.133)<br><b>Inconsistency measures: Not applicable</b><br>Incoherence judgment: <input type="button" value="No concerns"/>                                                                                                                                                                                   | <b>Comparison</b><br><b>Evidence: indirect</b><br>Indirect mean difference: -2782.800(-6786.314,1220.715)<br><b>Inconsistency measures: Not applicable</b><br>Incoherence judgment: <input type="button" value="No concerns"/>                                                                                                                                                                                   |
| <b>Comparison</b><br><b>Evidence: indirect</b><br>Indirect mean difference: -2922.125(-6876.217,1031.967)<br><b>Inconsistency measures: Not applicable</b><br>Incoherence judgment: <input type="button" value="No concerns"/>                                                                                                                                                                                   | <b>Comparison</b><br><b>Evidence: indirect</b><br>Indirect mean difference: -2850.064(-6802.813,1102.684)<br><b>Inconsistency measures: Not applicable</b><br>Incoherence judgment: <input type="button" value="No concerns"/>                                                                                                                                                                                       | <b>Comparison</b><br><b>Evidence: indirect</b><br>Indirect mean difference: 387.005(-2406.579,3180.590)<br><b>Inconsistency measures: Not applicable</b><br>Incoherence judgment: <input type="button" value="No concerns"/>                                                                                                                                                                                     |

(continued on next page)



|                                                                                                                                                                                                                             |                                                                                                                                                                                                                          |                                                                                                                                                                                                                             |
|-----------------------------------------------------------------------------------------------------------------------------------------------------------------------------------------------------------------------------|--------------------------------------------------------------------------------------------------------------------------------------------------------------------------------------------------------------------------|-----------------------------------------------------------------------------------------------------------------------------------------------------------------------------------------------------------------------------|
| <b>Comparison</b><br><b>Evidence:</b> indirect<br>Indirect mean difference: -539.144(-3193.609,2115.322)<br>Inconsistency measures: Not applicable<br>Incoherence judgment: <input type="button" value="No concerns"/>      | <b>Comparison</b><br><b>Evidence:</b> indirect<br>Indirect mean difference: -800.945(-3697.803,2095.912)<br>Inconsistency measures: Not applicable<br>Incoherence judgment: <input type="button" value="No concerns"/>   | <b>Comparison</b><br><b>Evidence:</b> indirect<br>Indirect mean difference: -4812.596(-8573.316,-1051.876)<br>Inconsistency measures: Not applicable<br>Incoherence judgment: <input type="button" value="No concerns"/>    |
| <b>Comparison</b><br><b>Evidence:</b> indirect<br>Indirect mean difference: -16801.172(-20641.679,-12960.665)<br>Inconsistency measures: Not applicable<br>Incoherence judgment: <input type="button" value="No concerns"/> | <b>Comparison</b><br><b>Evidence:</b> indirect<br>Indirect mean difference: -459.687(-3190.421,2271.048)<br>Inconsistency measures: Not applicable<br>Incoherence judgment: <input type="button" value="No concerns"/>   | <b>Comparison</b><br><b>Evidence:</b> indirect<br>Indirect mean difference: -599.012(-3256.761,2058.738)<br>Inconsistency measures: Not applicable<br>Incoherence judgment: <input type="button" value="No concerns"/>      |
| <b>Comparison</b><br><b>Evidence:</b> indirect<br>Indirect mean difference: -526.951(-3182.701,2128.798)<br>Inconsistency measures: Not applicable<br>Incoherence judgment: <input type="button" value="No concerns"/>      | <b>Comparison</b><br><b>Evidence:</b> indirect<br>Indirect mean difference: -4425.591(-7409.577,-1441.605)<br>Inconsistency measures: Not applicable<br>Incoherence judgment: <input type="button" value="No concerns"/> | <b>Comparison</b><br><b>Evidence:</b> indirect<br>Indirect mean difference: -16414.167(-19489.147,-13339.187)<br>Inconsistency measures: Not applicable<br>Incoherence judgment: <input type="button" value="No concerns"/> |
| <b>Comparison</b><br><b>Evidence:</b> indirect<br>Indirect mean difference: -212.007(-1510.784,1086.771)<br>Inconsistency measures: Not applicable<br>Incoherence judgment: <input type="button" value="No concerns"/>      | <b>Comparison</b><br><b>Evidence:</b> indirect<br>Indirect mean difference: -4273.453(-6974.848,-1572.057)<br>Inconsistency measures: Not applicable<br>Incoherence judgment: <input type="button" value="No concerns"/> | <b>Comparison</b><br><b>Evidence:</b> indirect<br>Indirect mean difference: -4011.651(-7092.534,-930.768)<br>Inconsistency measures: Not applicable<br>Incoherence judgment: <input type="button" value="No concerns"/>     |
| <b>Comparison</b><br><b>Evidence:</b> indirect<br>Indirect mean difference: -16000.227(-19169.323,-12831.130)<br>Inconsistency measures: Not applicable<br>Incoherence judgment: <input type="button" value="No concerns"/> | <b>Comparison</b><br><b>Evidence:</b> indirect<br>Indirect mean difference: 201.934(-1306.209,1710.076)<br>Inconsistency measures: Not applicable<br>Incoherence judgment: <input type="button" value="No concerns"/>    | <b>Comparison</b><br><b>Evidence:</b> indirect<br>Indirect mean difference: 4352.909(1470.438,7235.381)<br>Inconsistency measures: Not applicable<br>Incoherence judgment: <input type="button" value="No concerns"/>       |
| <b>Comparison</b><br><b>Evidence:</b> indirect<br>Indirect mean difference: 4285.645(1584.354,6986.936)<br>Inconsistency measures: Not applicable<br>Incoherence judgment: <input type="button" value="No concerns"/>       | <b>Comparison</b><br><b>Evidence:</b> indirect<br>Indirect mean difference: 16341.486(13365.273,19317.698)<br>Inconsistency measures: Not applicable<br>Incoherence judgment: <input type="button" value="No concerns"/> | <b>Comparison</b><br><b>Evidence:</b> indirect<br>Indirect mean difference: 16274.221(13471.874,19076.568)<br>Inconsistency measures: Not applicable<br>Incoherence judgment: <input type="button" value="No concerns"/>    |
| <b>Comparison</b><br><b>Evidence:</b> indirect<br>Indirect mean difference: -139.325(-1181.202,902.552)<br>Inconsistency measures: Not applicable<br>Incoherence judgment: <input type="button" value="No concerns"/>       |                                                                                                                                                                                                                          |                                                                                                                                                                                                                             |

Judgements for were assigned by the CiNEMA algorithm (27, 28).



**Figure S19.** Network plot and meta-analysis of UNCOUPLING INTERVENTIONS evaluating the effect of non-nutritive sweetened beverages (NNS beverages) sweetened single or blends of non-nutritive sweeteners (NNS), water, and sugar-sweetened beverages (SSBs) sweetened with caloric sweeteners on postprandial blood INSULIN response in participants with TYPE 2 DIABETES

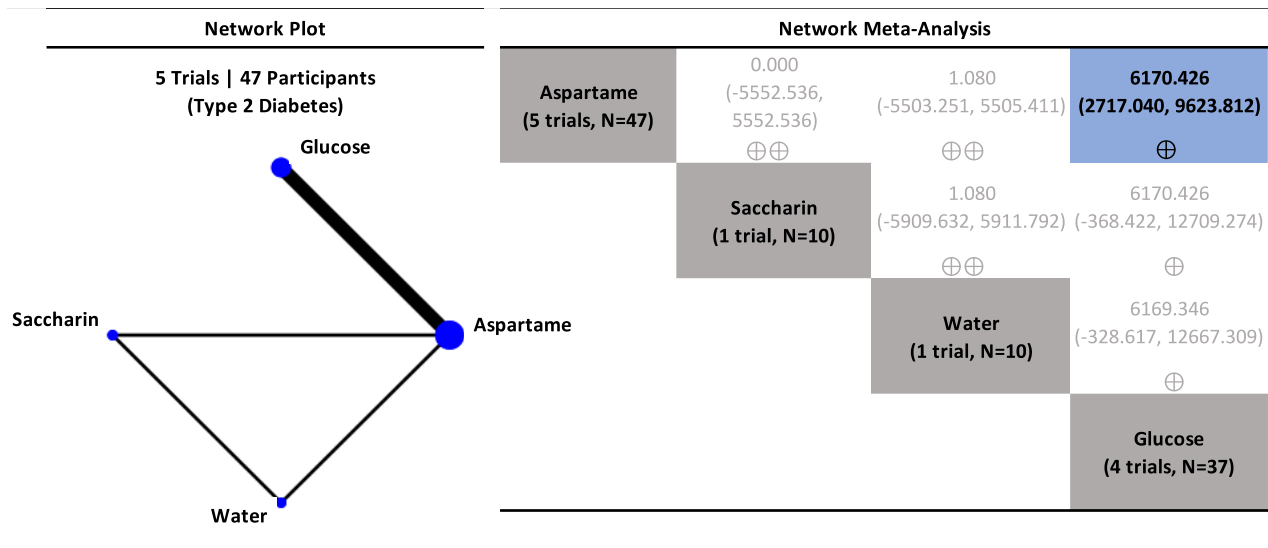

Network plot: the size of the blue nodes is proportional to the number of participants and the line width is proportional to the number of studies. Network table: treatments are grouped by treatment type (i.e., individual non-nutritive sweeteners (NNS), NNS blends, water and caloric sweeteners) and are reported in alphabetical order. Treatment estimates (pmol\*min/L) are MDs and 95% CIs of the column-defining treatment compared with the row-defining treatment. MDs less than 0 favor the column-defining treatment. MDs greater than 0 favor the row-defining treatment. Significant results are bolded in black. Non-significant results are grey and not bolded. The minimally important difference (MID) for postprandial glucose response is 2250 pmol\*min/L. Trivial (significant) effects (<1 MID) or no effects have a white background; small important effects ( $\geq 1$  MID) have a light blue background; moderate effects ( $\geq 2$  MID) have a darker blue background; large effects ( $\geq 5$  to <10 MID) have a purple background; very large effects ( $\geq 10$  MID) have a black background. Confidence in the effect estimate is shown for each treatment comparison: high confidence ⊕⊕⊕⊕; moderate confidence ⊕⊕⊕; low confidence ⊕⊕; very low confidence ⊕. See **Supplementary Table 9 and Figures 20-23** for detailed assessments of the confidence in the effect estimate using the CINeMA framework.



**Figure S20.** Risk of bias assessment of UNCOUPLING INTERVENTIONS evaluating the effect of non-nutritive sweetened beverages (NNS beverages) sweetened single or blends of non-nutritive sweeteners (NNS), water, and sugar-sweetened beverages (SSBs) sweetened with caloric sweeteners on postprandial blood INSULIN response in participants with TYPE 2 DIABETES

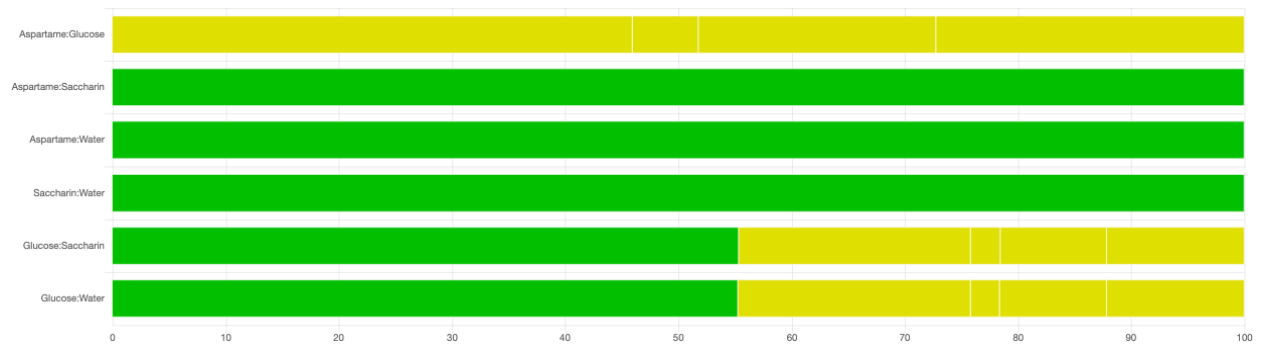

Green = no concerns; yellow = some concerns; red = major concerns



**Figure S21.** CINeMA output for the IMPRECISION domain of UNCOUPLING INTERVENTIONS evaluating the effect of non-nutritive sweetened beverages (NNS beverages) sweetened single or blends of non-nutritive sweeteners (NNS), water, and sugar-sweetened beverages (SSBs) sweetened with caloric sweeteners on postprandial blood INSULIN response in participants with TYPE 2 DIABETES

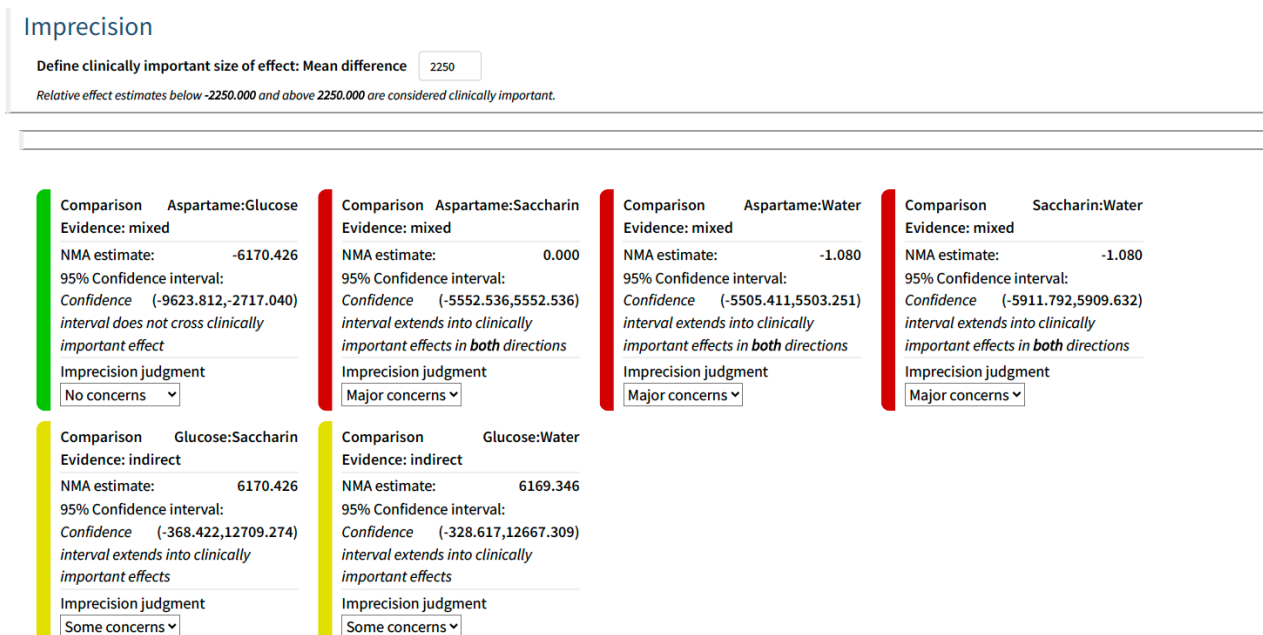

Relative effect estimates below -2250.0 and above 2250.0 pmol\*min/L (minimal important difference; MID) were considered clinically important. Judgements for IMPRECISION were assigned by the CiNEMA algorithm (27, 28). There is no general consensus on a clinically important size difference for 2-hour blood insulin incremental area under the curve (iAUC). Health Canada considers a 20% reduction in glucose iAUC to be the minimum physiologically relevant difference as per “Guideline Concerning the Safety and Physiological Effects of Novel Fibre Sources and Food Products Containing Them” (29). Extrapolating the 20% threshold in glucose iAUC, we calculated the MID of insulin iAUC by taking 20% of 11250 pmol\*mins/L which is the median of insulin iAUC in participants with type 2 diabetes (~6200 pmol\*mins/L) and healthy participants (~16300 pmol\*mins/L) after a 75-g oral glucose tolerance test (32-34).



**Figure S22.** CINeMA output for the HETEROGENEITY domain of UNCOUPLING INTERVENTIONS evaluating the effect of non-nutritive sweetened beverages (NNS beverages) sweetened single or blends of non-nutritive sweeteners (NNS), water, and sugar-sweetened beverages (SSBs) sweetened with caloric sweeteners on postprandial blood INSULIN response in participants with TYPE 2 DIABETES

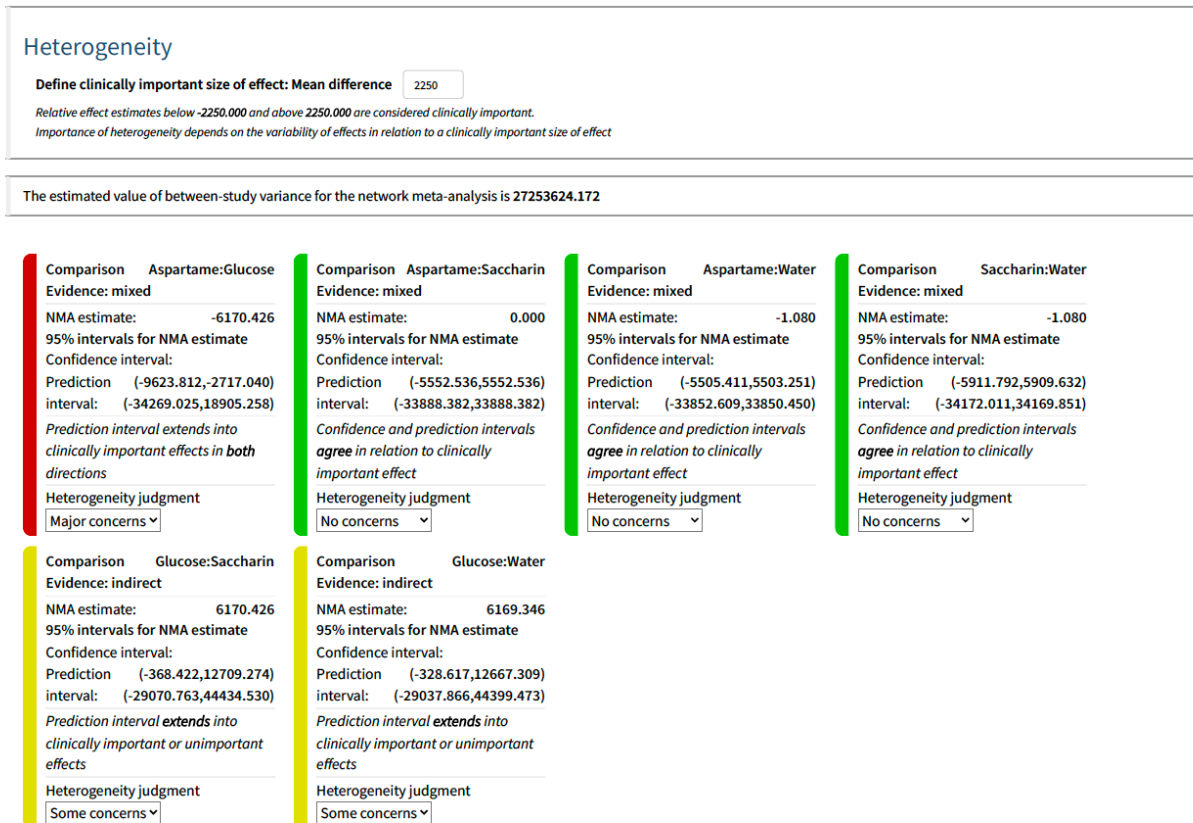

Judgements for were assigned by the CiNeMA algorithm (27, 28).



**Figure S23.** CINeMA output for the INCOHERENCE domain of UNCOUPLING INTERVENTIONS evaluating the effect of non-nutritive sweetened beverages (NNS beverages) sweetened single or blends of non-nutritive sweeteners (NNS), water, and sugar-sweetened beverages (SSBs) sweetened with caloric sweeteners on postprandial blood INSULIN response in participants with TYPE 2 DIABETES

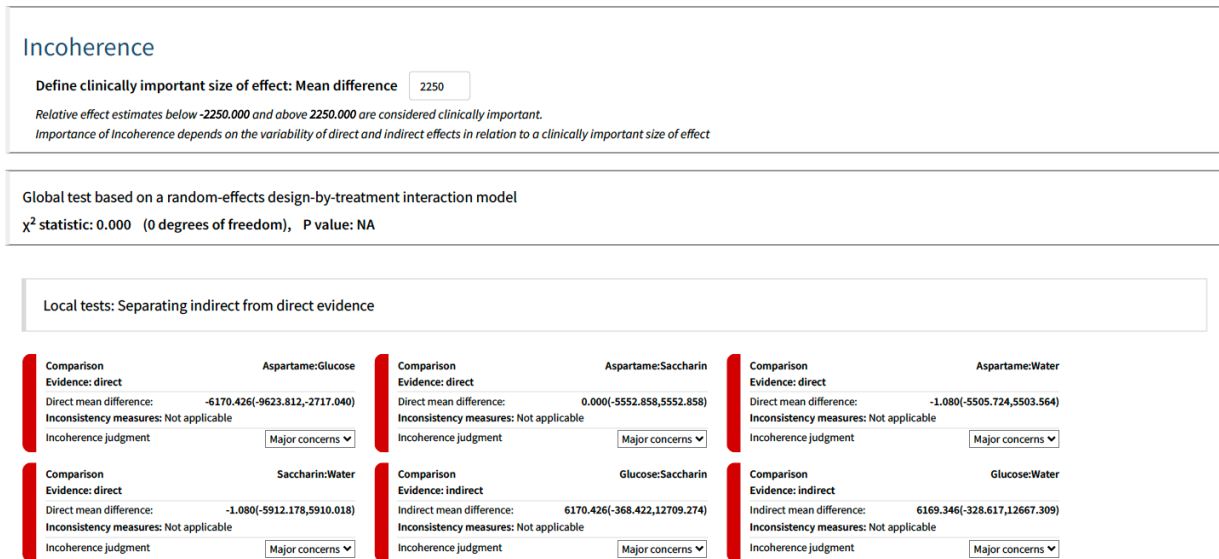

Judgements for were assigned by the CiNEMA algorithm (27, 28).



**Figure S24.** Network plot and meta-analysis of UNCOUPLING INTERVENTIONS evaluating the effect of non-nutritive sweetened beverages (NNS beverages) sweetened single or blends of non-nutritive sweeteners (NNS), water, and sugar-sweetened beverages (SSBs) sweetened with caloric sweeteners on postprandial blood GLP-1 response in HEALTHY participants

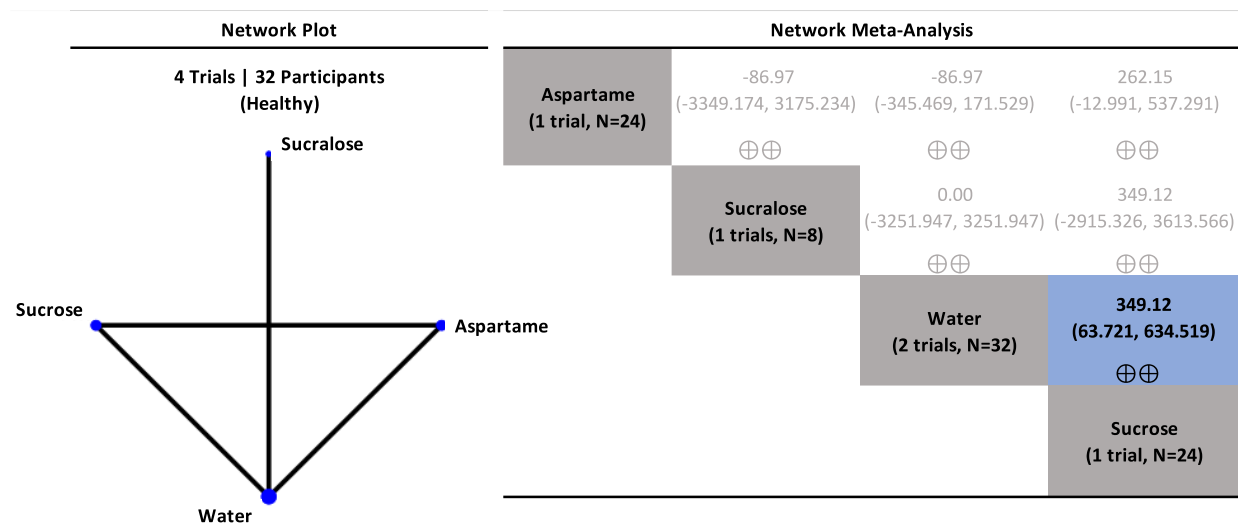

Network plot: the size of the blue nodes is proportional to the number of participants and the line width is proportional to the number of studies. Network table: treatments are grouped by treatment type (i.e., individual non-nutritive sweeteners (NNS), NNS blends, water and caloric sweeteners) and are reported in alphabetical order. Treatment estimates (pmol\*min/L) are MDs and 95% CIs of the column-defining treatment compared with the row-defining treatment. MDs less than 0 favor the column-defining treatment. MDs greater than 0 favor the row-defining treatment. Significant results are bolded in black. Non-significant results are grey and not bolded. The minimally important difference (MID) for postprandial glucose response is 82 pmol\*min/L. Trivial (significant) effects (<1 MID) or no effects have a white background; small important effects ( $\geq 1$  MID) have a light blue background; moderate effects ( $\geq 2$  MID) have a darker blue background; large effects ( $\geq 5$  to <10 MID) have a purple background; very large effects ( $\geq 10$  MID) have a black background. Confidence in the effect estimate is shown for each treatment comparison: high confidence ⊕⊕⊕⊕; moderate confidence ⊕⊕⊕; low confidence ⊕⊕; very low confidence ⊕. See **Supplementary Table 10 and Figure 25** for detailed assessments of the confidence in the effect estimate using the CINeMA framework.



**Figure S25.** Risk of bias assessment of UNCOUPLING INTERVENTIONS evaluating the effect of non-nutritive sweetened beverages (NNS beverages) sweetened single or blends of non-nutritive sweeteners (NNS), water, and sugar-sweetened beverages (SSBs) sweetened with caloric sweeteners on postprandial blood GLP-1 response in HEALTHY participants

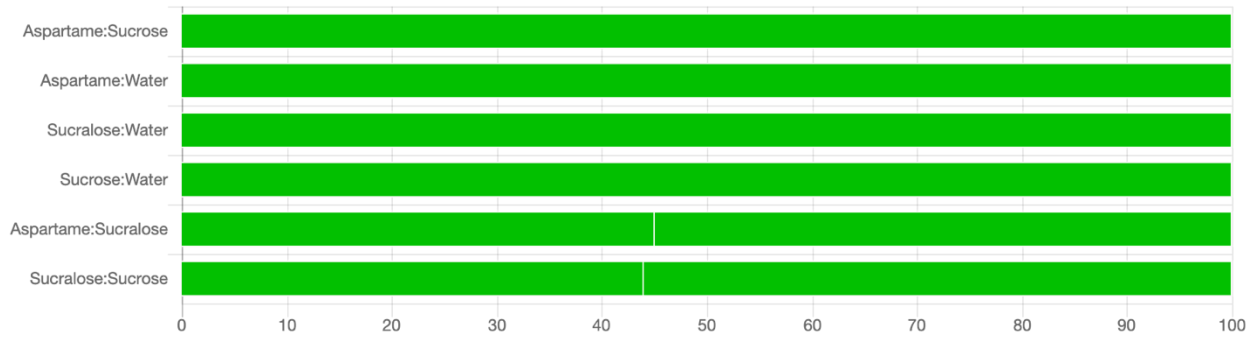

Green = no concerns; yellow = some concerns; red = major concerns



**Figure S26.** Network plot and meta-analysis of UNCOUPLING INTERVENTIONS evaluating the effect of non-nutritive sweetened beverages (NNS beverages) sweetened single or blends of non-nutritive sweeteners (NNS), water, and sugar-sweetened beverages (SSBs) sweetened with caloric sweeteners on postprandial blood GIP response in HEALTHY participants

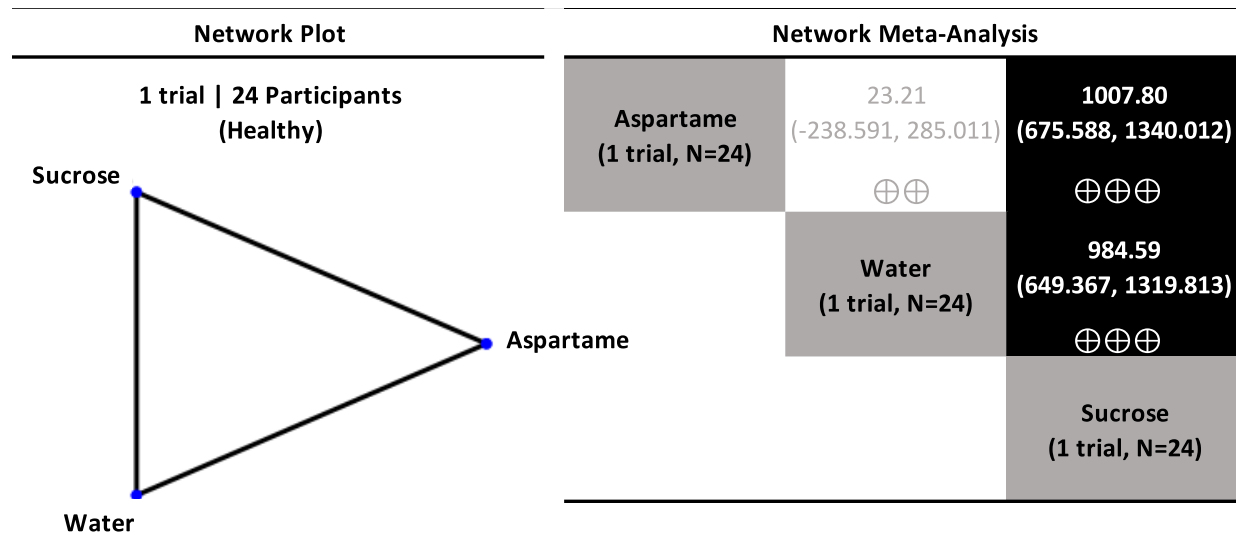

Network plot: the size of the blue nodes is proportional to the number of participants and the line width is proportional to the number of studies. Network table: treatments are grouped by treatment type (i.e., individual non-nutritive sweeteners (NNS), NNS blends, water and caloric sweeteners) and are reported in alphabetical order. Treatment estimates (pmol\*min/L) are MDs and 95% CIs of the column-defining treatment compared with the row-defining treatment. MDs less than 0 favor the column-defining treatment. MDs greater than 0 favor the row-defining treatment. Significant results are bolded in white. Non-significant results are grey and not bolded. The minimally important difference (MID) for postprandial glucose response is 82 pmol\*min/L. Trivial (significant) effects (<1 MID) or no effects have a white background; small important effects (≥1 MID) have a light blue background; moderate effects (≥2 MID) have a darker blue background; large effects (≥5 to <10 MID) have a purple background; very large effects (≥10 MID) have a black background. Confidence in the effect estimate is shown for each treatment comparison: high confidence ⊕⊕⊕⊕; moderate confidence ⊕⊕⊕; low confidence ⊕⊕; very low confidence ⊕. See **Supplementary Table 11 and Figure 27** for detailed assessments of the confidence in the effect estimate using the CINeMA framework.



**Figure S27.** Risk of bias assessment of UNCOUPLING INTERVENTIONS evaluating the effect of non-nutritive sweetened beverages (NNS beverages) sweetened single or blends of non-nutritive sweeteners (NNS), water, and sugar-sweetened beverages (SSBs) sweetened with caloric sweeteners on postprandial blood GIP response in HEALTHY participants

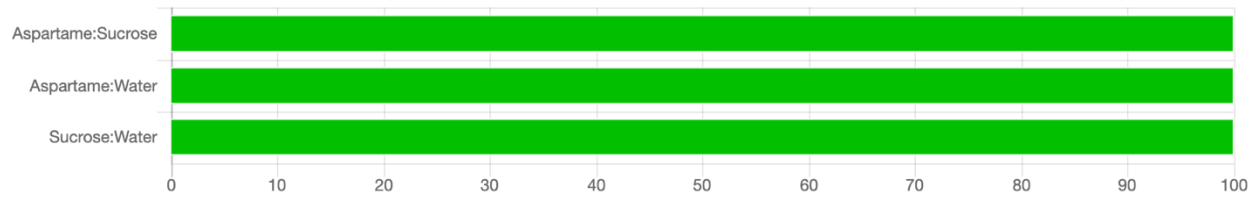

Green = no concerns; yellow = some concerns; red = major concerns



**Figure S28.** Network plot and meta-analysis of UNCOUPLING INTERVENTIONS evaluating the effect of non-nutritive sweetened beverages (NNS beverages) sweetened single or blends of non-nutritive sweeteners (NNS), water, and sugar-sweetened beverages (SSBs) sweetened with caloric sweeteners on postprandial blood GHRELIN response in HEALTHY participants

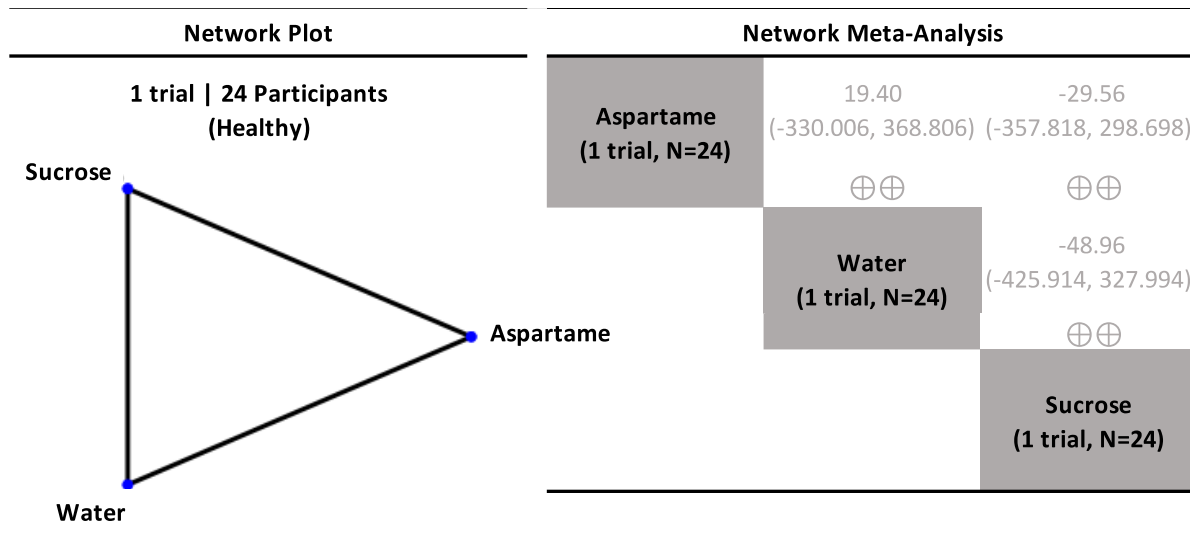

Network plot: the size of the blue nodes is proportional to the number of participants and the line width is proportional to the number of studies. Network table: treatments are grouped by treatment type (i.e., individual non-nutritive sweeteners (NNS), NNS blends, water and caloric sweeteners) and are reported in alphabetical order. Treatment estimates (pmol\*min/L) are MDs and 95% CIs of the column-defining treatment compared with the row-defining treatment. MDs less than 0 favor the column-defining treatment. MDs greater than 0 favor the row-defining treatment. Significant results are bolded in white. Non-significant results are grey and not bolded. The minimally important difference (MID) for postprandial glucose response is 10 pmol\*min/L. Trivial (significant) effects (<1 MID) or no effects have a white background; small important effects ( $\geq 1$  MID) have a light blue background; moderate effects ( $\geq 2$  MID) have a darker blue background; large effects ( $\geq 5$  to <10 MID) have a purple background; very large effects ( $\geq 10$  MID) have a black background. Confidence in the effect estimate is shown for each treatment comparison: high confidence ⊕⊕⊕⊕; moderate confidence ⊕⊕⊕; low confidence ⊕⊕; very low confidence ⊕. See **Supplementary Table 12 and Figure 29** for detailed assessments of the confidence in the effect estimate using the CINeMA framework.



**Figure S29.** Risk of bias assessment of UNCOUPLING INTERVENTIONS evaluating the effect of non-nutritive sweetened beverages (NNS beverages) sweetened single or blends of non-nutritive sweeteners (NNS), water, and sugar-sweetened beverages (SSBs) sweetened with caloric sweeteners on postprandial blood GHRELIN response in HEALTHY participants

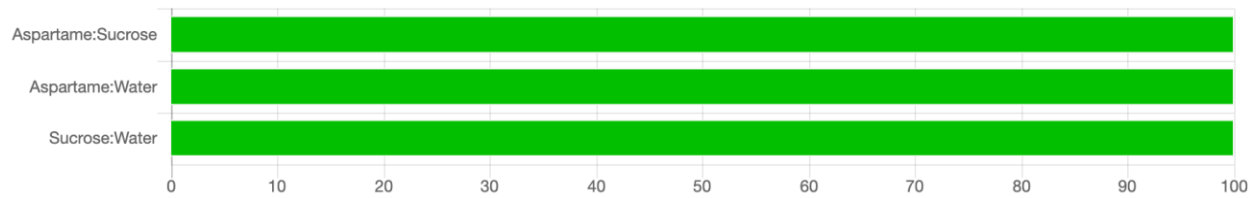

Green = no concerns; yellow = some concerns; red = major concerns



**Figure S30.** Network plot and meta-analysis of UNCOUPLING INTERVENTIONS evaluating the effect of non-nutritive sweetened beverages (NNS beverages) sweetened single or blends of non-nutritive sweeteners (NNS), water, and sugar-sweetened beverages (SSBs) sweetened with caloric sweeteners on postprandial blood GLUCAGON response in HEALTHY participants

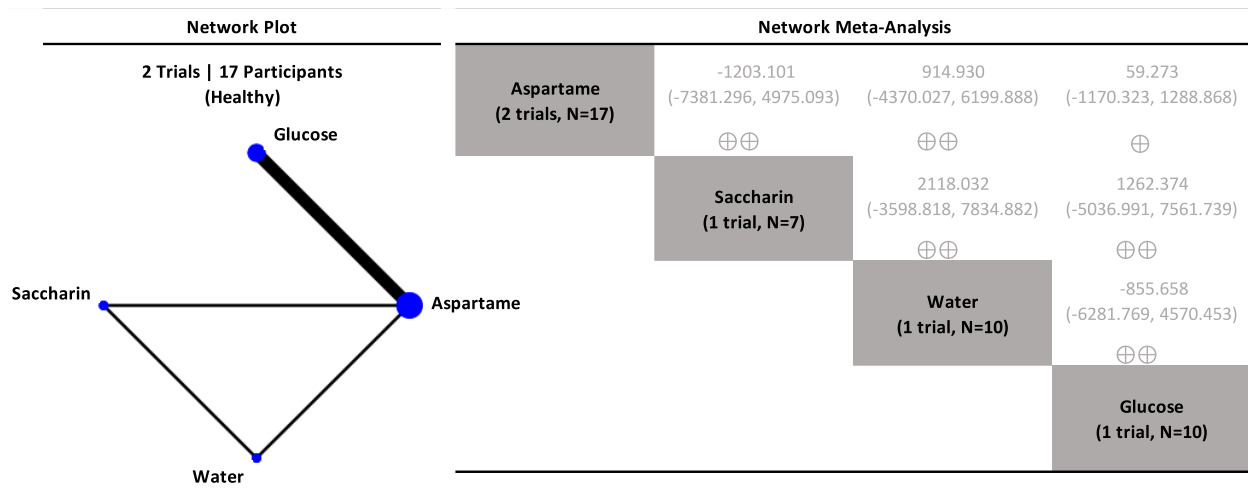

Network plot: the size of the blue nodes is proportional to the number of participants and the line width is proportional to the number of studies. Network table: treatments are grouped by treatment type (i.e., individual non-nutritive sweeteners (NNS), NNS blends, water and caloric sweeteners) and are reported in alphabetical order. Treatment estimates (pmol\*min/L) are MDs and 95% CIs of the column-defining treatment compared with the row-defining treatment. MDs less than 0 favor the column-defining treatment. MDs greater than 0 favor the row-defining treatment. Significant results are bolded in white. Non-significant results are grey and not bolded. The minimally important difference (MID) for postprandial glucose response is 205 pmol\*min/L. Trivial (significant) effects (<1 MID) or no effects have a white background; small important effects (≥1 MID) have a light blue background; moderate effects (≥2 MID) have a darker blue background; large effects (≥5 to <10 MID) have a purple background; very large effects (≥10 MID) have a black background. Confidence in the effect estimate is shown for each treatment comparison: high confidence ⊕⊕⊕⊕; moderate confidence ⊕⊕⊕; low confidence ⊕⊕; very low confidence ⊕. See **Supplementary Table 13** and **Figure 31** for detailed assessments of the confidence in the effect estimate using the CINeMA framework.



**Figure S31.** Risk of bias assessment of UNCOUPLING INTERVENTIONS evaluating the effect of non-nutritive sweetened beverages (NNS beverages) sweetened single or blends of non-nutritive sweeteners (NNS), water, and sugar-sweetened beverages (SSBs) sweetened with caloric sweeteners on postprandial blood GLUCAGON response in HEALTHY participants

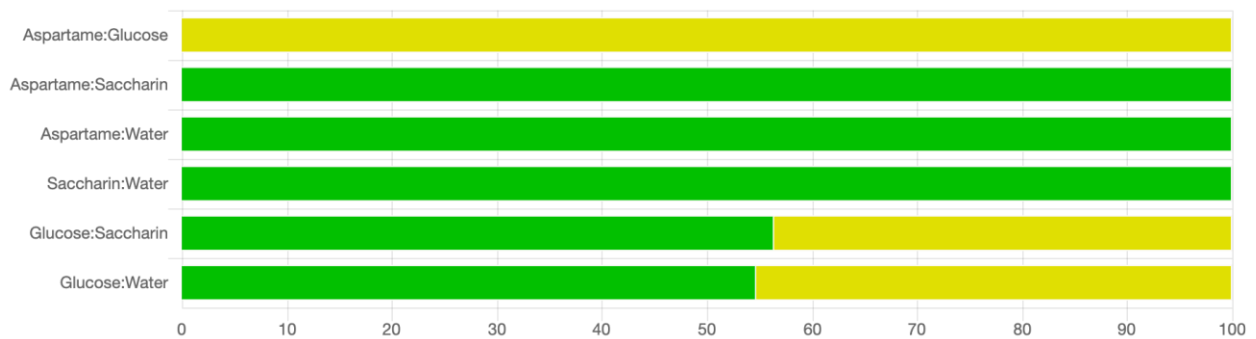

Green = no concerns; yellow = some concerns; red = major concerns



**Figure S32.** Network plot and meta-analysis of UNCOUPLING INTERVENTIONS evaluating the effect of non-nutritive sweetened beverages (NNS beverages) sweetened single or blends of non-nutritive sweeteners (NNS), water, and sugar-sweetened beverages (SSBs) sweetened with caloric sweeteners on postprandial blood GLUCAGON response in participants with TYPE 2 DIABETES

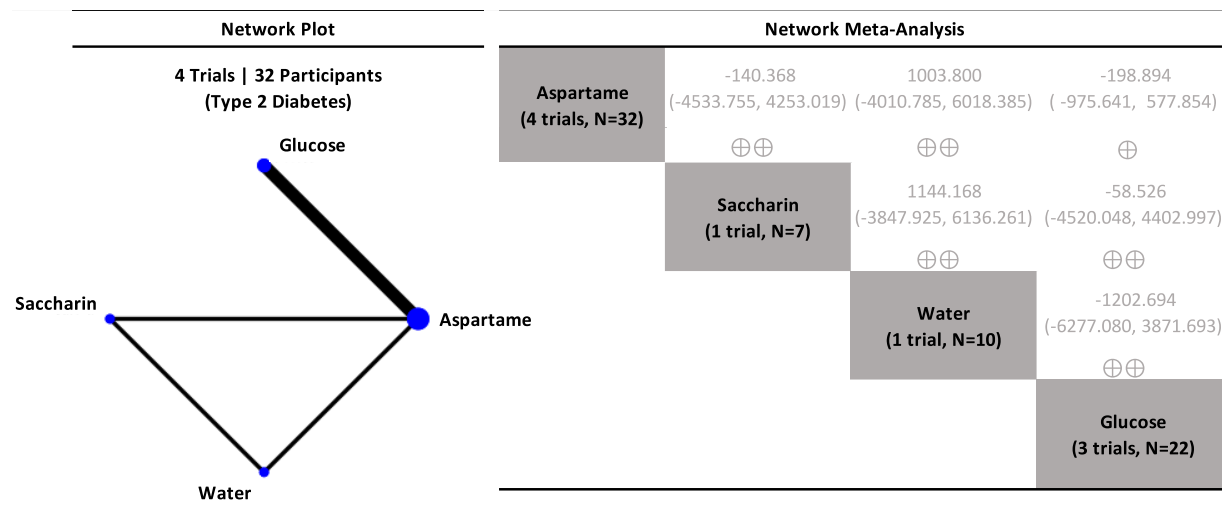

Network plot: the size of the blue nodes is proportional to the number of participants and the line width is proportional to the number of studies. Network table: treatments are grouped by treatment type (i.e., individual non-nutritive sweeteners (NNS), NNS blends, water and caloric sweeteners) and are reported in alphabetical order. Treatment estimates (pmol\*min/L) are MDs and 95% CIs of the column-defining treatment compared with the row-defining treatment. MDs less than 0 favor the column-defining treatment. MDs greater than 0 favor the row-defining treatment. Significant results are bolded in white. Non-significant results are grey and not bolded. The minimally important difference (MID) for postprandial glucose response is 205 pmol\*min/L. Trivial (significant) effects (<1 MID) or no effects have a white background; small important effects ( $\geq 1$  MID) have a light blue background; moderate effects ( $\geq 2$  MID) have a darker blue background; large effects ( $\geq 5$  to  $<10$  MID) have a purple background; very large effects ( $\geq 10$  MID) have a black background. Confidence in the effect estimate is shown for each treatment comparison: high confidence  $\oplus\oplus\oplus\oplus$ ; moderate confidence  $\oplus\oplus\oplus$ ; low confidence  $\oplus\oplus$ ; very low confidence  $\oplus$ . See **Supplementary Table 14** and **Figure 33** for detailed assessments of the confidence in the effect estimate using the CINeMA framework.



**Figure S33.** Risk of bias assessment of UNCOUPLING INTERVENTIONS evaluating the effect of non-nutritive sweetened beverages (NNS beverages) sweetened single or blends of non-nutritive sweeteners (NNS), water, and sugar-sweetened beverages (SSBs) sweetened with caloric sweeteners on postprandial blood GLUCAGON response in participants with TYPE 2 DIABETES

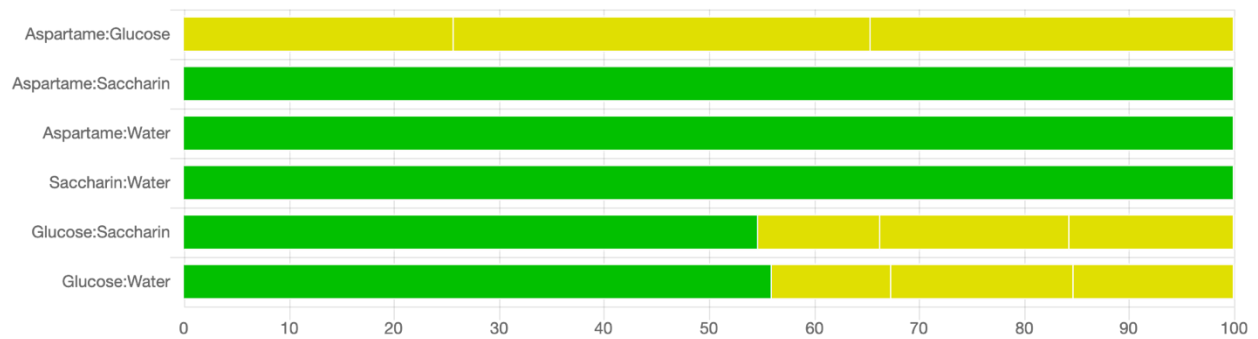

Green = no concerns; yellow = some concerns; red = major concerns



**Figure S34.** Risk of bias assessment of COUPLING INTERVENTIONS evaluating the effect of non-nutritive sweetened beverages (NNS beverages) sweetened single or blends of non-nutritive sweeteners (NNS) and controls on postprandial blood GLUCOSE response in HEALTHY participants.

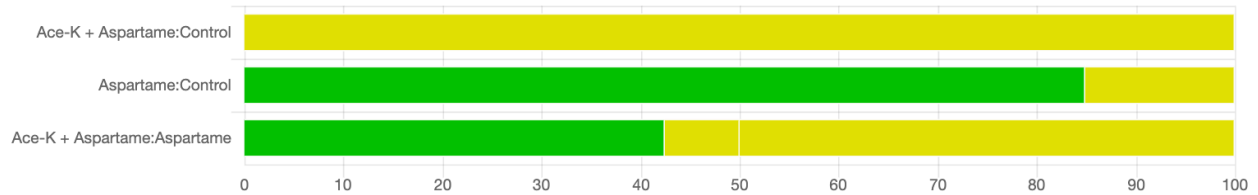

Green = no concerns; yellow = some concerns; red = major concerns



**Figure S35.** Network plot and meta-analysis of COUPLING INTERVENTIONS evaluating the effect of non-nutritive sweetened beverages (NNS beverages) sweetened single or blends of non-nutritive sweeteners (NNS) and controls on postprandial blood INSULIN response in HEALTHY participants.

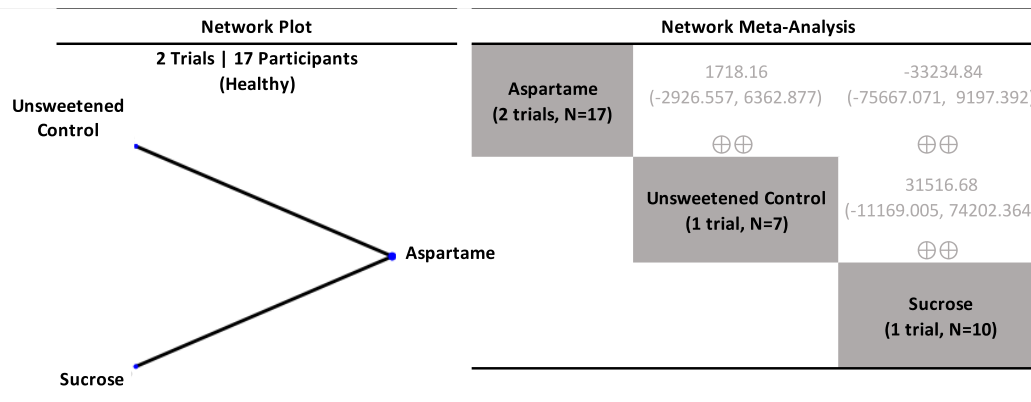

Network plot: the size of the blue nodes is proportional to the number of participants and the line width is proportional to the number of studies. Network table: treatments are grouped by treatment type (i.e., individual non-nutritive sweeteners (NNS), NNS blends, water and caloric sweeteners) and are reported in alphabetical order. Treatment estimates (mmol\*min/L) are MDs and 95% CIs of the column-defining treatment compared with the row-defining treatment. MDs less than 0 favor the column-defining treatment. MDs greater than 0 favor the row-defining treatment. Significant results are bolded in black. Non-significant results are grey and not bolded. The minimally important difference (MID) for postprandial glucose response is 2250 pmol\*min/L. Trivial (significant) effects (<1 MID) or no effects have a white background; small important effects ( $\geq 1$  MID) have a light blue background; moderate effects ( $\geq 2$  MID) have a darker blue background; large effects ( $\geq 5$  to <10 MID) have a purple background; very large effects ( $\geq 10$  MID) have a black background. Confidence in the effect estimate is shown for each treatment comparison: high confidence  $\oplus\oplus\oplus\oplus$ ; moderate confidence  $\oplus\oplus\oplus$ ; low confidence  $\oplus\oplus$ ; very low confidence  $\oplus$ . See **Supplementary Table 16 and Figures 36-40** for detailed assessments of the confidence in the effect estimate using the CINeMA framework.



**Figure S36.** Risk of bias assessment of COUPLING INTERVENTIONS evaluating the effect of non-nutritive sweetened beverages (NNS beverages) sweetened single or blends of non-nutritive sweeteners (NNS) and controls on postprandial blood INSULIN response in HEALTHY participants.

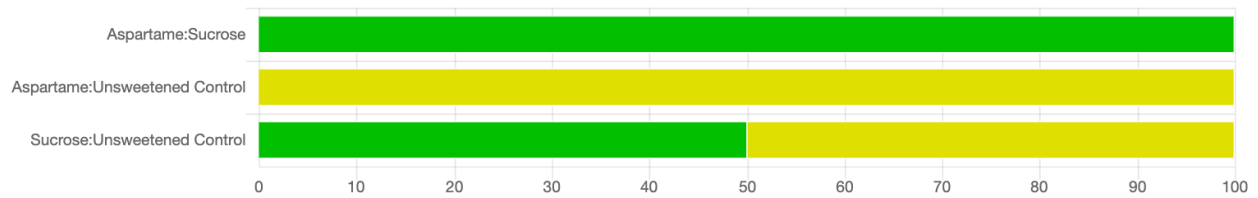

Green = no concerns; yellow = some concerns; red = major concerns



**Figure S37.** Risk of bias assessment of DELAYED COUPLING INTERVENTIONS evaluating the effect of non-nutritive sweetened beverages (NNS beverages) sweetened single or blends of non-nutritive sweeteners (NNS), water, and sugar-sweetened beverages (SSBs) sweetened with caloric sweeteners on postprandial blood GLUCOSE response in HEALTHY participants

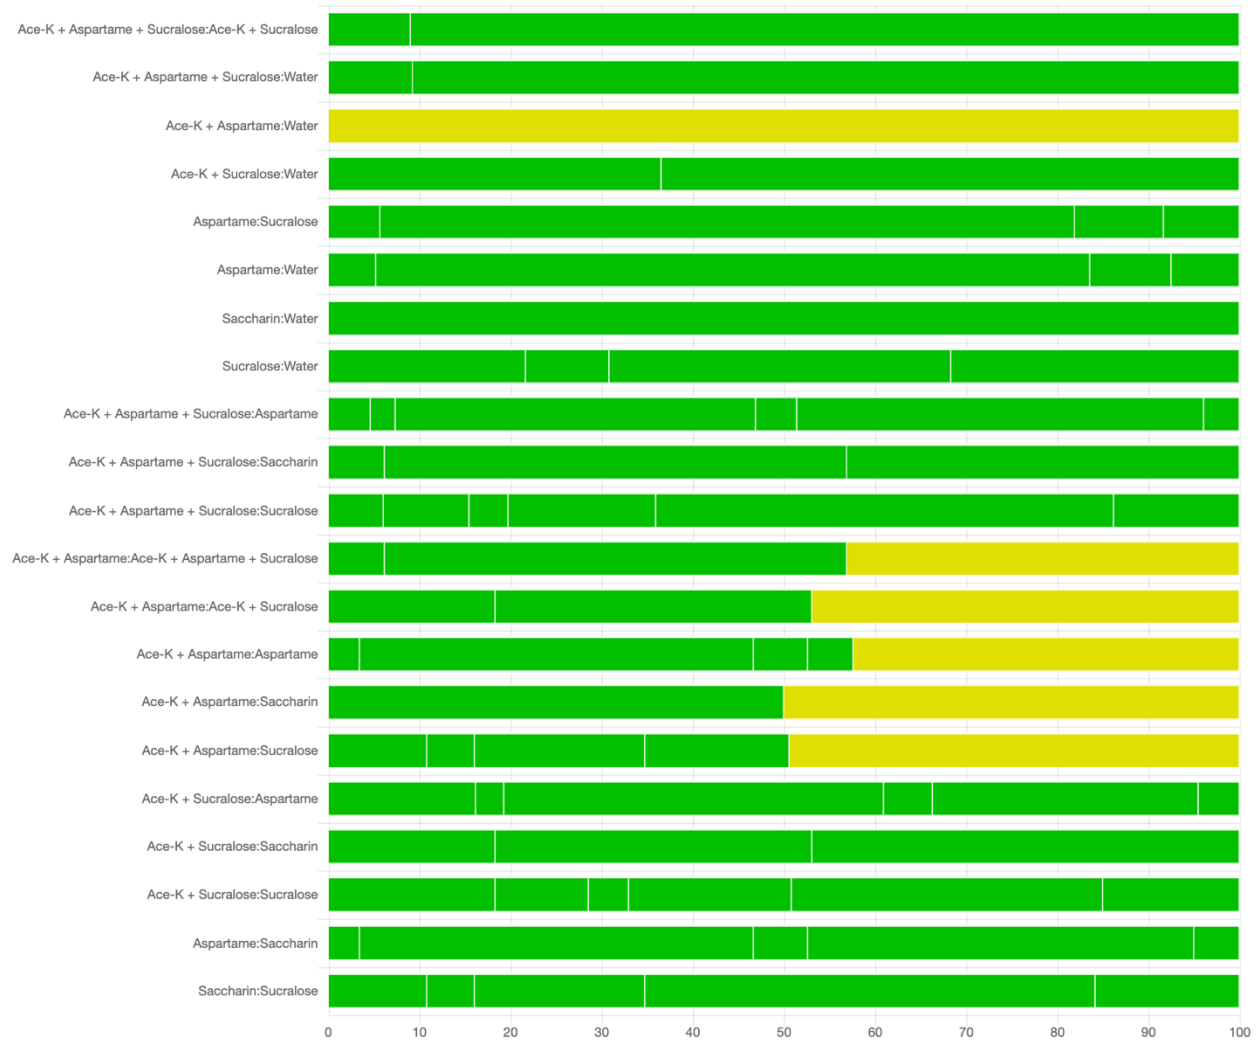

Green = no concerns; yellow = some concerns; red = major concerns



**Figure S38.** CINeMA output for the IMPRECISION domain of DELAYED COUPLING INTERVENTIONS evaluating the effect of non-nutritive sweetened beverages (NNS beverages) sweetened single or blends of non-nutritive sweeteners (NNS), water, and sugar-sweetened beverages (SSBs) sweetened with caloric sweeteners on postprandial blood GLUCOSE response in HEALTHY participants

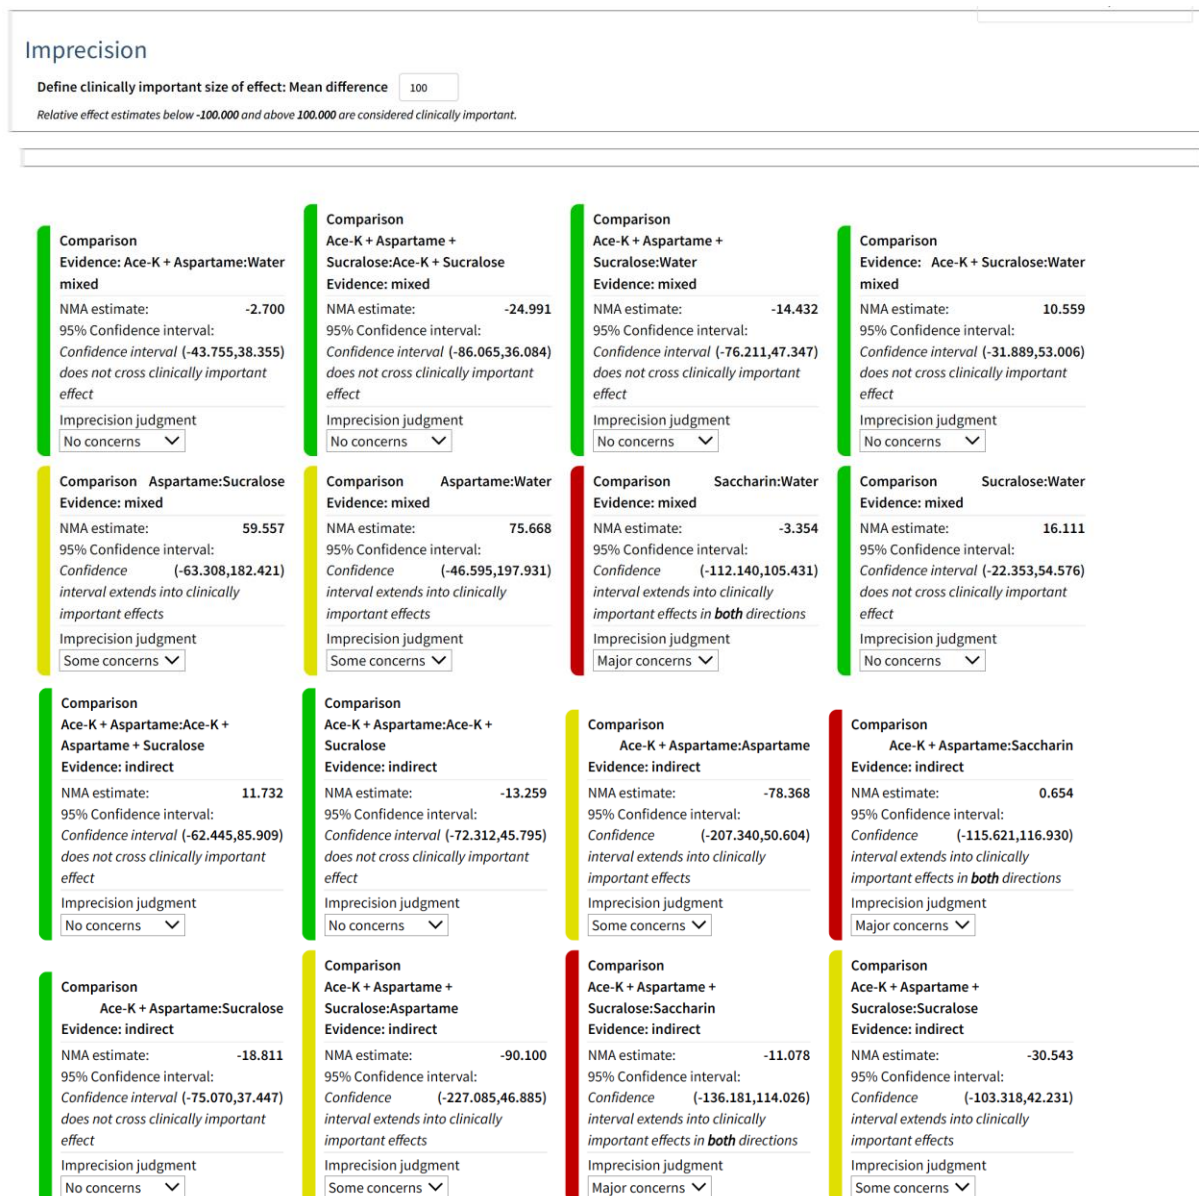

(continued on next page)



|                                                                                                                                                                                                                                                                                   |                                                                                                                                                                                                                                                                                                       |                                                                                                                                                                                                                                                                                |                                                                                                                                                                                                                                                                |
|-----------------------------------------------------------------------------------------------------------------------------------------------------------------------------------------------------------------------------------------------------------------------------------|-------------------------------------------------------------------------------------------------------------------------------------------------------------------------------------------------------------------------------------------------------------------------------------------------------|--------------------------------------------------------------------------------------------------------------------------------------------------------------------------------------------------------------------------------------------------------------------------------|----------------------------------------------------------------------------------------------------------------------------------------------------------------------------------------------------------------------------------------------------------------|
| <b>Comparison</b><br><b>Ace-K + Sucralose:Aspartame</b><br><b>Evidence: indirect</b><br>NMA estimate: -65.109<br>95% Confidence interval:<br>Confidence (-194.531,64.312)<br><i>interval extends into clinically important effects</i><br>Imprecision judgment<br>Some concerns ▼ | <b>Comparison</b><br><b>Ace-K + Sucralose:Saccharin</b><br><b>Evidence: indirect</b><br>NMA estimate: 13.913<br>95% Confidence interval:<br>Confidence (-102.861,130.687)<br><i>interval extends into clinically important effects in both directions</i><br>Imprecision judgment<br>Major concerns ▼ | <b>Comparison</b><br><b>Ace-K + Sucralose:Sucralose</b><br><b>Evidence: indirect</b><br>NMA estimate: -5.553<br>95% Confidence interval:<br>Confidence interval (-62.835,51.730)<br><i>does not cross clinically important effect</i><br>Imprecision judgment<br>No concerns ▼ | <b>Comparison</b> Aspartame:Saccharin<br><b>Evidence: indirect</b><br>NMA estimate: 79.022<br>95% Confidence interval:<br>Confidence (-84.631,242.676)<br><i>interval extends into clinically important effects</i><br>Imprecision judgment<br>Some concerns ▼ |
| <b>Comparison</b> Saccharin:Sucralose<br><b>Evidence: indirect</b><br>NMA estimate: -19.466<br>95% Confidence interval:<br>Confidence (-134.851,95.920)<br><i>interval extends into clinically important effects</i><br>Imprecision judgment<br>Some concerns ▼                   |                                                                                                                                                                                                                                                                                                       |                                                                                                                                                                                                                                                                                |                                                                                                                                                                                                                                                                |

Relative effect estimates below -100.0 and above 100.0 mmol\*min/L (minimal important difference; MID) were considered clinically important. Judgements for IMPRECISION were assigned by the CiNEMA algorithm (27, 28). There is no general consensus on a clinically important size difference for 2-hour blood glucose incremental area under the curve (iAUC). Health Canada considers a 20% reduction in glucose iAUC to be the minimum physiologically relevant difference as per “Guideline Concerning the Safety and Physiological Effects of Novel Fibre Sources and Food Products Containing Them” (29). Thus, we calculated the MID by taking 20% of 500 mmol\*mins/L which is the median of glucose iAUC in healthy participants (~300 mmol\*mins/L) and those with type 2 diabetes (~700 mmol\*mins/L) after a 75-g oral glucose tolerance test (32-34).



**Figure S39.** CINeMA output for the HETEROGENEITY domain of DELAYED COUPLING INTERVENTIONS evaluating the effect of non-nutritive sweetened beverages (NNS beverages) sweetened single or blends of non-nutritive sweeteners (NNS), water, and sugar-sweetened beverages (SSBs) sweetened with caloric sweeteners on postprandial blood GLUCOSE response in HEALTHY participants

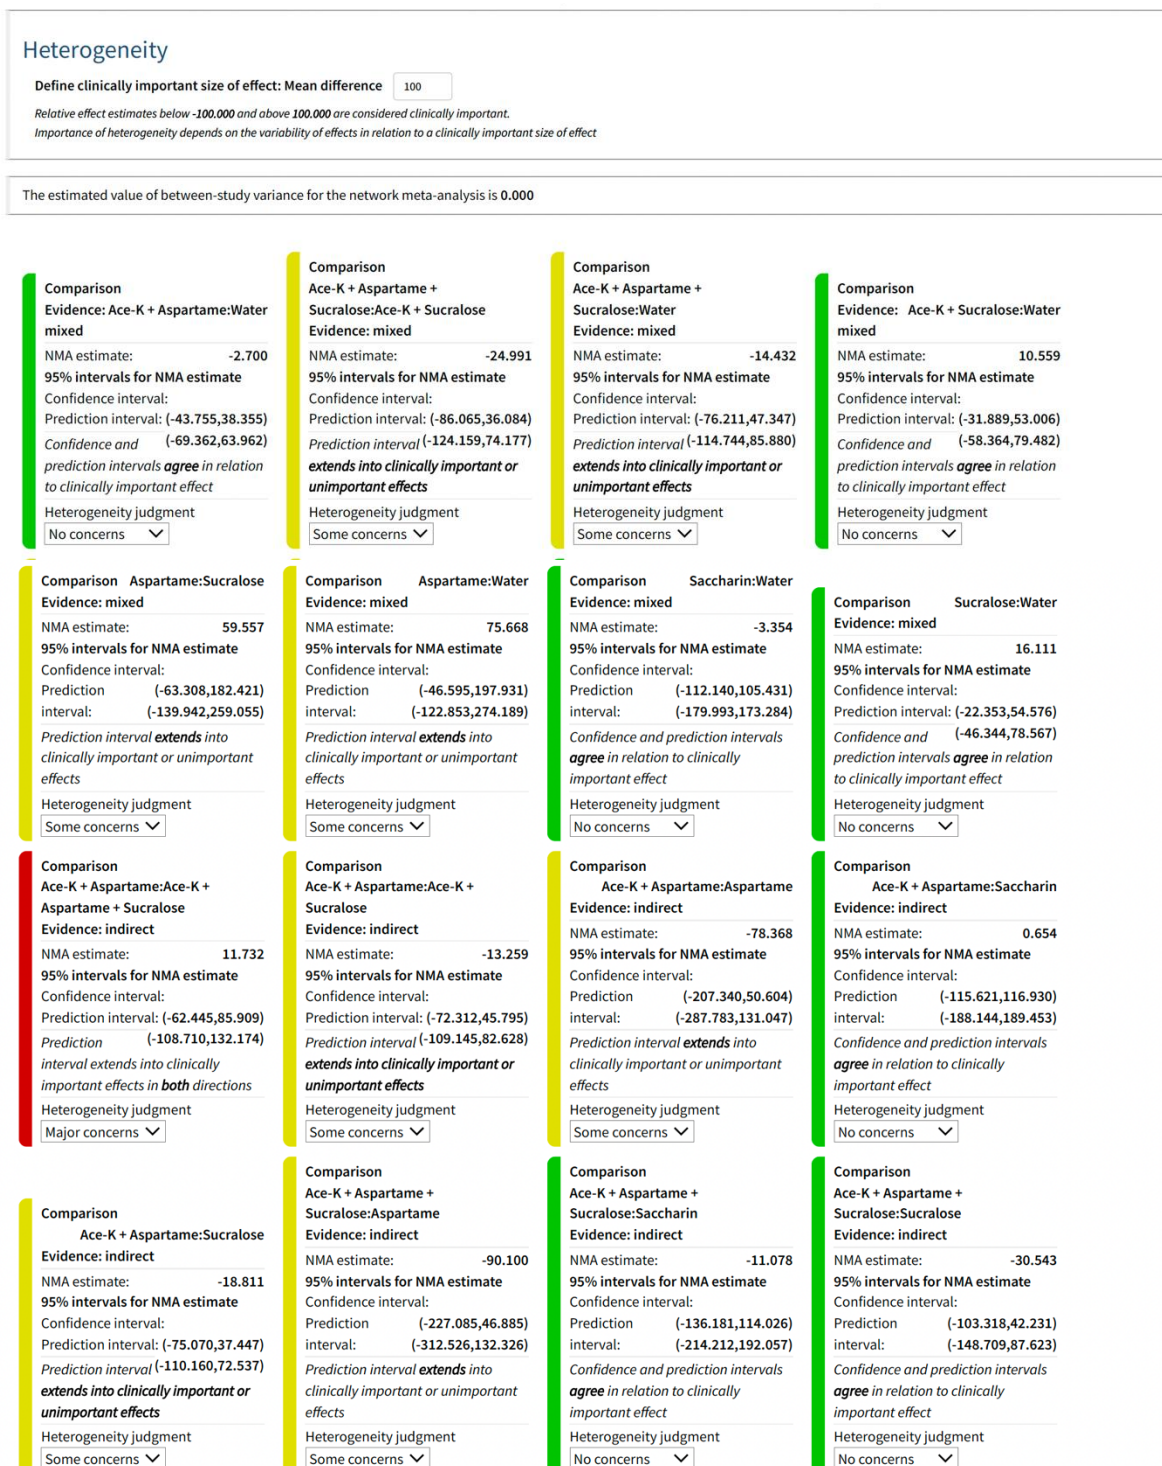



Comparison Ace-K + Sucralose:Aspartame  
Evidence: indirect  
NMA estimate: -65.109  
95% intervals for NMA estimate  
Confidence interval:  
Prediction (-194.531,64.312)  
interval: (-275.255,145.036)  
Prediction interval **extends** into clinically important or unimportant effects  
Heterogeneity judgment  
Some concerns ▼

Comparison Ace-K + Sucralose:Saccharin  
Evidence: indirect  
NMA estimate: 13.913  
95% intervals for NMA estimate  
Confidence interval:  
Prediction (-102.861,130.687)  
interval: (-175.696,203.522)  
Confidence and prediction intervals **agree** in relation to clinically important effect  
Heterogeneity judgment  
No concerns ▼

Comparison Ace-K + Sucralose:Sucralose  
Evidence: indirect  
NMA estimate: -5.553  
95% intervals for NMA estimate  
Confidence interval:  
Prediction interval: (-62.835,51.730)  
Confidence and prediction intervals **agree** in relation to clinically important effect  
Heterogeneity judgment  
No concerns ▼

Comparison Aspartame:Saccharin  
Evidence: indirect  
NMA estimate: 79.022  
95% intervals for NMA estimate  
Confidence interval:  
Prediction (-84.631,242.676)  
interval: (-186.707,344.752)  
Prediction interval **extends** into clinically important or unimportant effects  
Heterogeneity judgment  
Some concerns ▼

Comparison Saccharin:Sucralose  
Evidence: indirect  
NMA estimate: -19.466  
95% intervals for NMA estimate  
Confidence interval:  
Prediction (-134.851,95.920)  
interval: (-206.821,167.889)  
Prediction interval **extends** into clinically important or unimportant effects  
Heterogeneity judgment  
Some concerns ▼



**Figure S40.** CINeMA output for the INCOHERENCE domain of DELAYED COUPLING INTERVENTIONS evaluating the effect of non-nutritive sweetened beverages (NNS beverages) sweetened single or blends of non-nutritive sweeteners (NNS), water, and sugar-sweetened beverages (SSBs) sweetened with caloric sweeteners on postprandial blood GLUCOSE response in HEALTHY participants

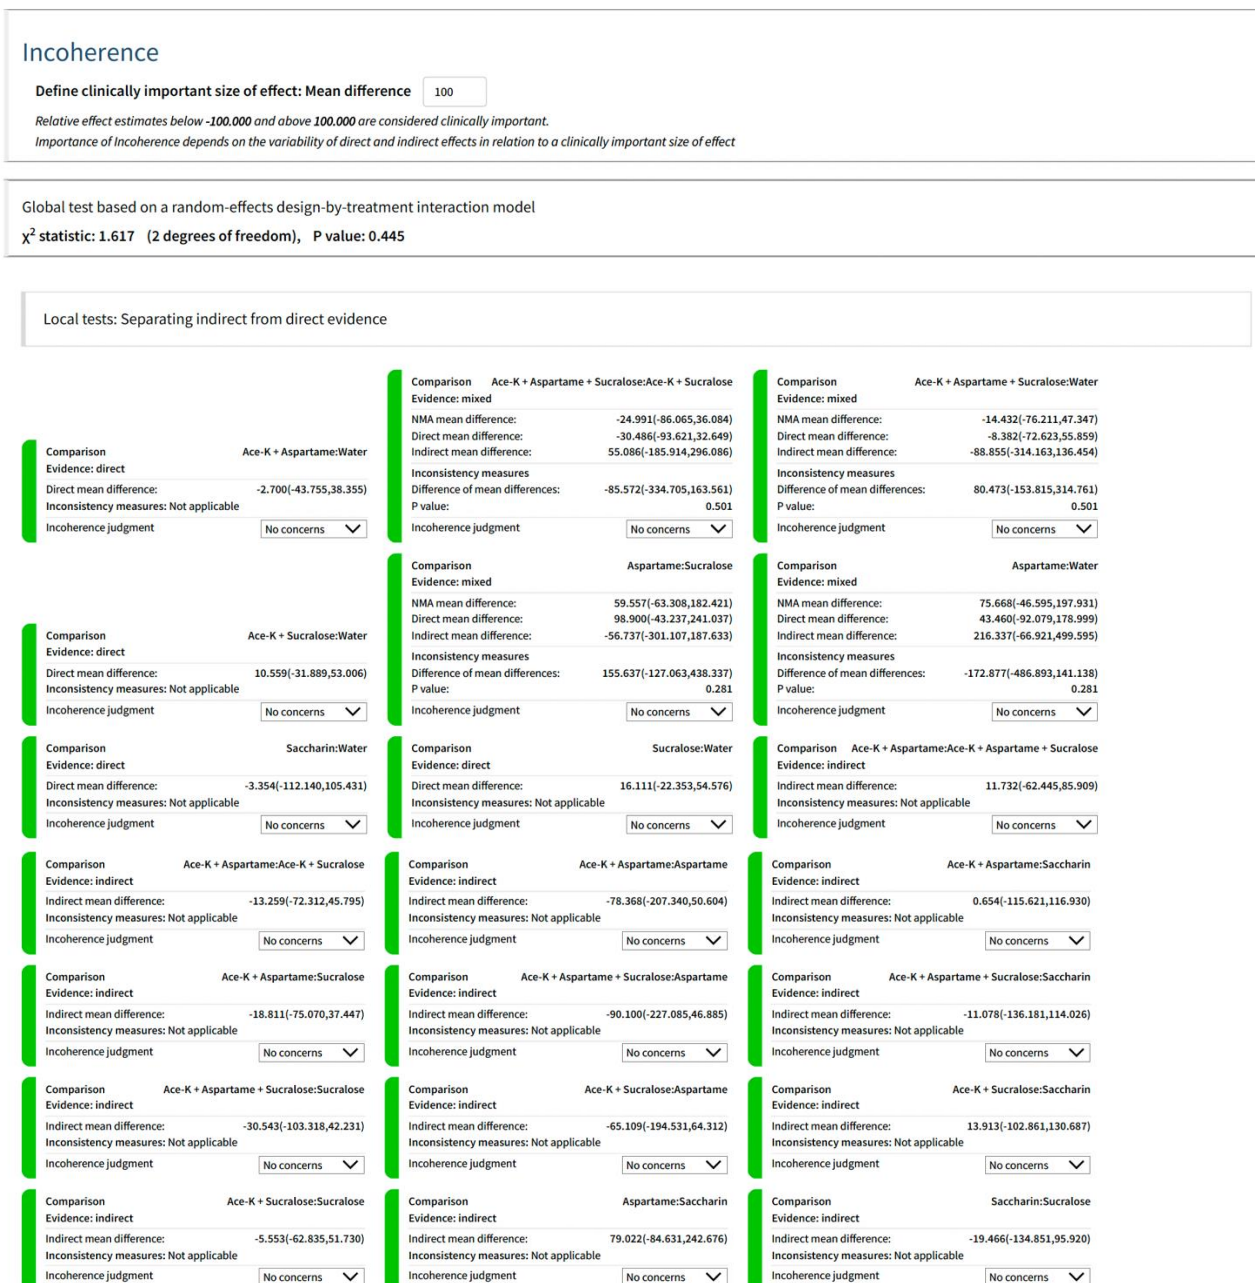



**Figure S41.** Risk of bias assessment of DELAYED COUPLING INTERVENTIONS evaluating the effect of non-nutritive sweetened beverages (NNS beverages) sweetened single or blends of non-nutritive sweeteners (NNS), water, and sugar-sweetened beverages (SSBs) sweetened with caloric sweeteners on postprandial blood GLUCOSE response in participants with TYPE 2 DIABETES

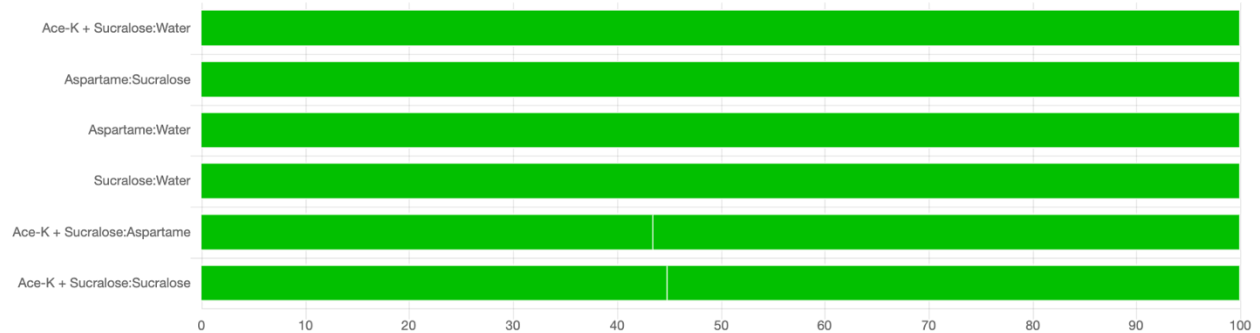

Green = no concerns; yellow = some concerns; red = major concerns



**Figure S42.** Network plot and meta-analysis of DELAYED COUPLING INTERVENTIONS evaluating the effect of non-nutritive sweetened beverages (NNS beverages) sweetened single or blends of non-nutritive sweeteners (NNS), water, and sugar-sweetened beverages (SSBs) sweetened with caloric sweeteners on postprandial blood INSULIN response in HEALTHY participants

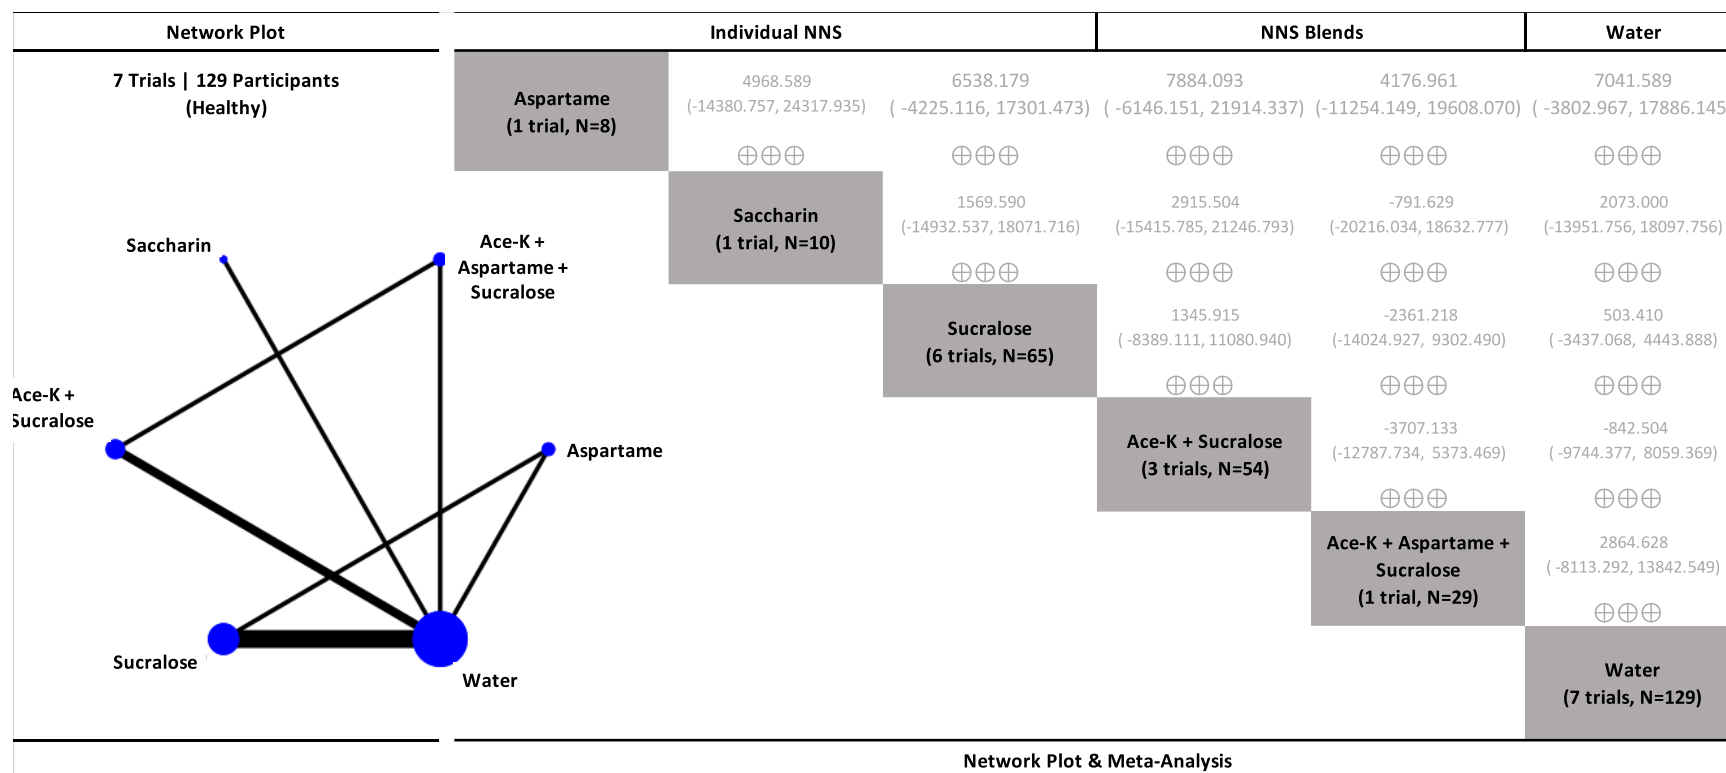

Network plot: the size of the blue nodes is proportional to the number of participants and the line width is proportional to the number of studies. Network table: treatments are grouped by treatment type (i.e., individual non-nutritive sweeteners (NNS), NNS blends, water and caloric sweeteners) and are reported in alphabetical order. Treatment estimates (pmol\*min/L) are MDs and 95% CIs of the column-defining treatment compared with the row-defining treatment. MDs less than 0 favor the column-defining treatment. MDs greater than 0 favor the row-defining treatment. Significant results are bolded in black. Non-significant results are grey and not bolded. The minimally important difference (MID) for postprandial glucose response is 2250 pmol\*min/L. Trivial



(significant) effects ( $<1$  MID) or no effects have a white background; small important effects ( $\geq 1$  MID) have a light blue background; moderate effects ( $\geq 2$  MID) have a darker blue background; large effects ( $\geq 5$  to  $<10$  MID) have a purple background; very large effects ( $\geq 10$  MID) have a black background. Confidence in the effect estimate is shown for each treatment comparison: high confidence  $\oplus\oplus\oplus\oplus$ ; moderate confidence  $\oplus\oplus\oplus$ ; low confidence  $\oplus\oplus$ ; very low confidence  $\oplus$ . See **Supplementary Table 19 and Figures 43-46** for detailed assessments of the confidence in the effect estimate using the CINeMA framework.



**Figure S43.** Risk of bias assessment of DELAYED COUPLING INTERVENTIONS evaluating the effect of non-nutritive sweetened beverages (NNS beverages) sweetened single or blends of non-nutritive sweeteners (NNS), water, and sugar-sweetened beverages (SSBs) sweetened with caloric sweeteners on postprandial blood INSULIN response in HEALTHY participants

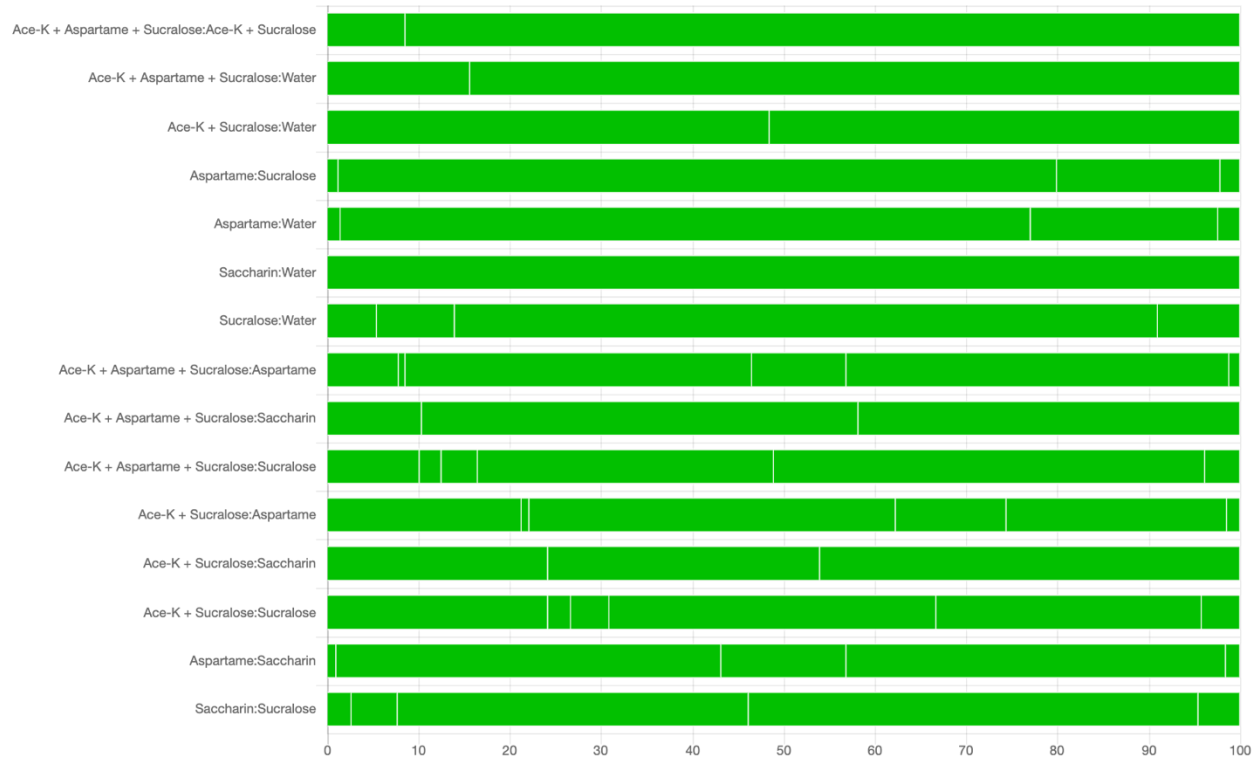

Green = no concerns; yellow = some concerns; red = major concerns



**Figure S44.** CINeMA output for the IMPRECISION domain of DELAYED COUPLING INTERVENTIONS evaluating the effect of non-nutritive sweetened beverages (NNS beverages) sweetened single or blends of non-nutritive sweeteners (NNS), water, and sugar-sweetened beverages (SSBs) sweetened with caloric sweeteners on postprandial blood INSULIN response in HEALTHY participants

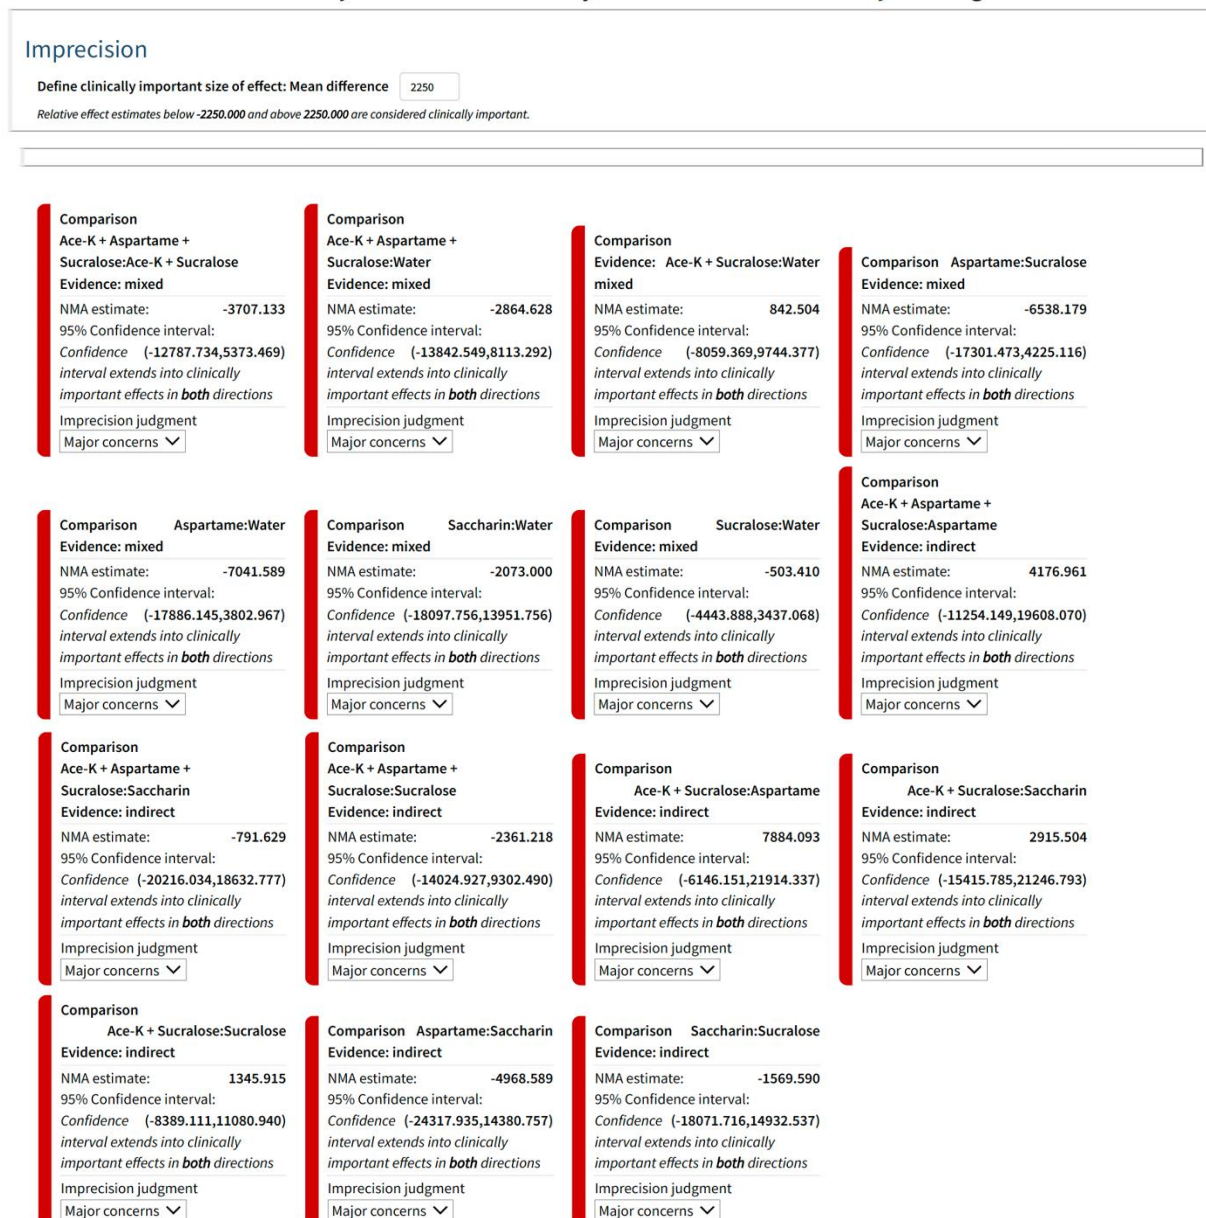

Relative effect estimates below -2250.0 and above 2250.0 pmol\*min/L (minimal important difference; MID) were considered clinically important. Judgements for IMPRECISION were assigned by the CiNEMA algorithm (27, 28). There is no general consensus on a clinically important size difference for 2-hour blood insulin incremental area under the curve (iAUC). Health Canada considers a 20% reduction in glucose iAUC to be the minimum physiologically relevant difference as per “Guideline Concerning the Safety and Physiological Effects of Novel Fibre Sources and Food Products Containing Them” (29). Extrapolating the 20% threshold in glucose iAUC, we calculated



the MID of insulin iAUC by taking 20% of 11250 pmol\*mins/L which is the median of insulin iAUC in participants with type 2 diabetes (~6200 pmol\*mins/L) and healthy participants (~16300 pmol\*mins/L) after a 75-g oral glucose tolerance test (32-34).



**Figure S45.** CINeMA output for the HETEROGENEITY domain of DELAYED COUPLING INTERVENTIONS evaluating the effect of non-nutritive sweetened beverages (NNS beverages) sweetened single or blends of non-nutritive sweeteners (NNS), water, and sugar-sweetened beverages (SSBs) sweetened with caloric sweeteners on postprandial blood INSULIN response in HEALTHY participants

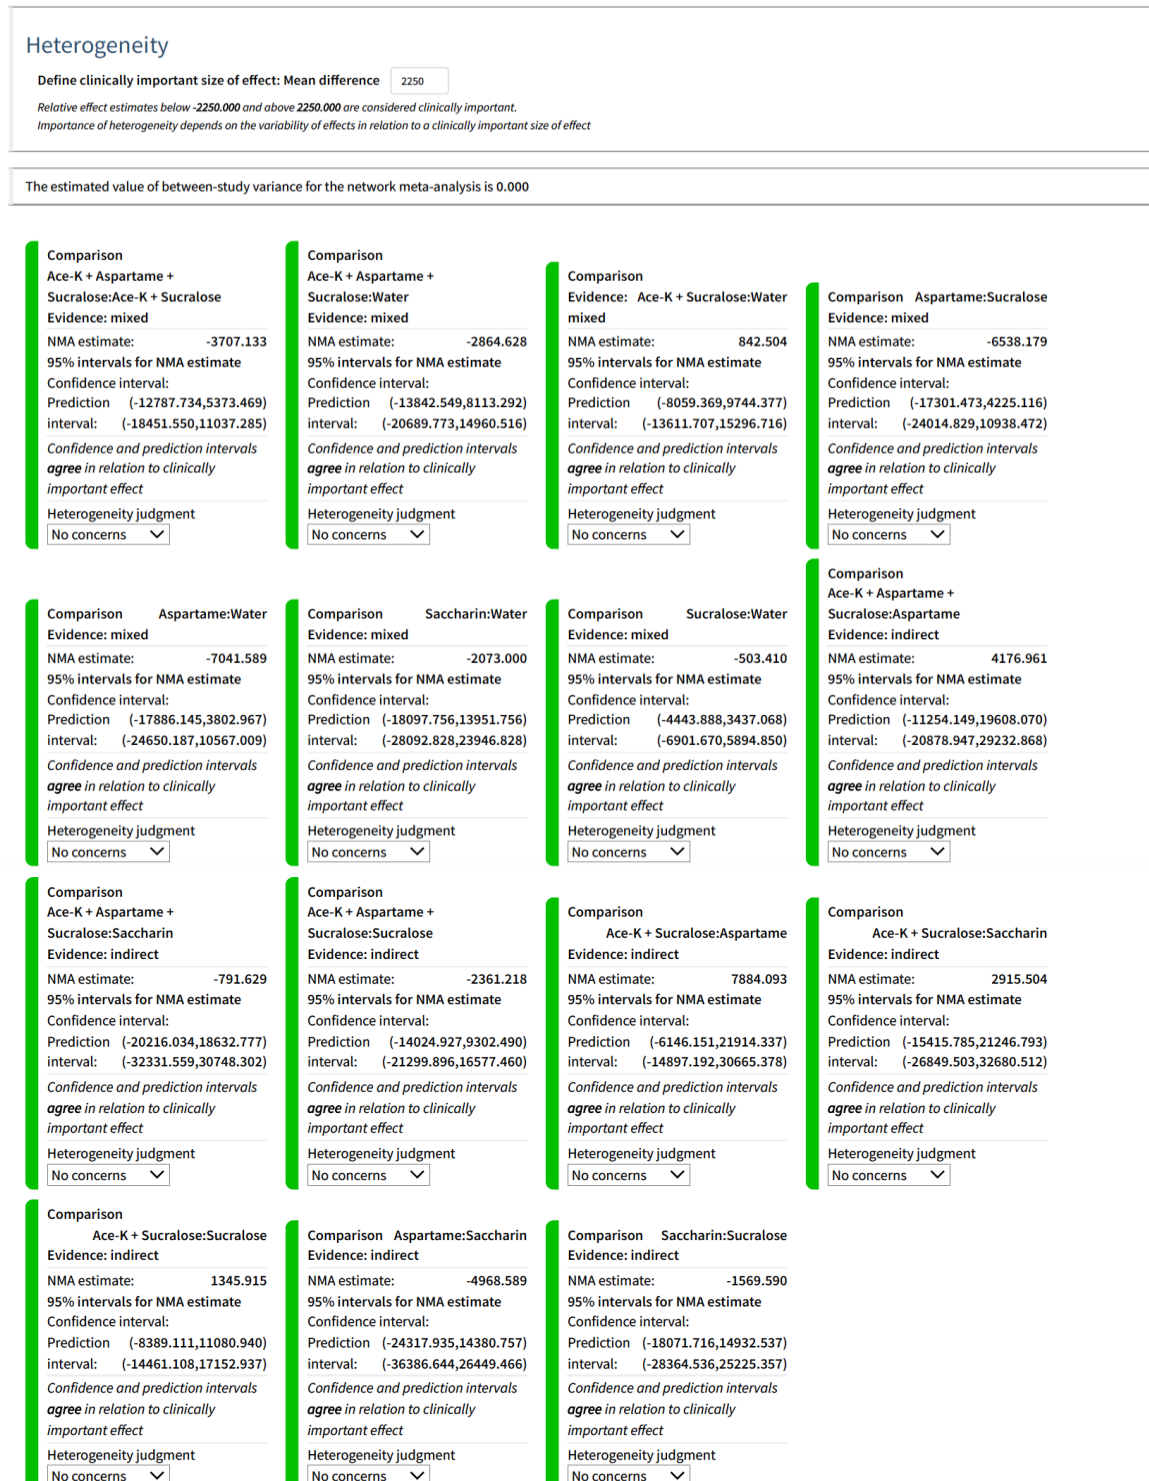



**Figure S46.** CINeMA output for the INCOHERENCE domain of DELAYED COUPLING INTERVENTIONS evaluating the effect of non-nutritive sweetened beverages (NNS beverages) sweetened single or blends of non-nutritive sweeteners (NNS), water, and sugar-sweetened beverages (SSBs) sweetened with caloric sweeteners on postprandial blood INSULIN response in HEALTHY participants

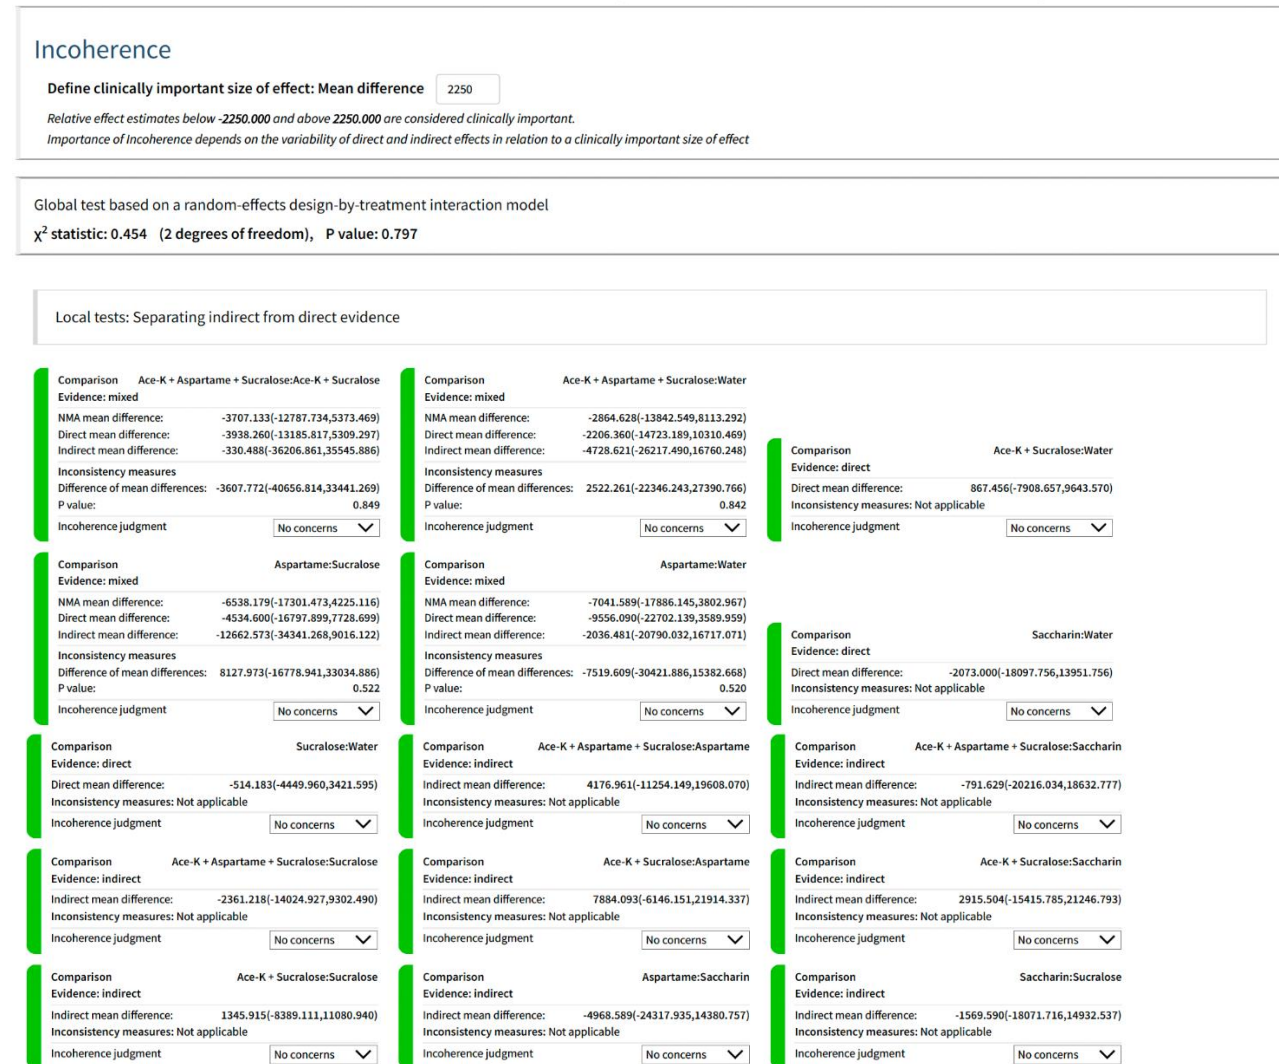



**Figure S47.** Network plot and meta-analysis of DELAYED COUPLING INTERVENTIONS evaluating the effect of non-nutritive sweetened beverages (NNS beverages) sweetened single or blends of non-nutritive sweeteners (NNS), water, and sugar-sweetened beverages (SSBs) sweetened with caloric sweeteners on postprandial blood INSULIN response in participants with TYPE 2 DIABETES

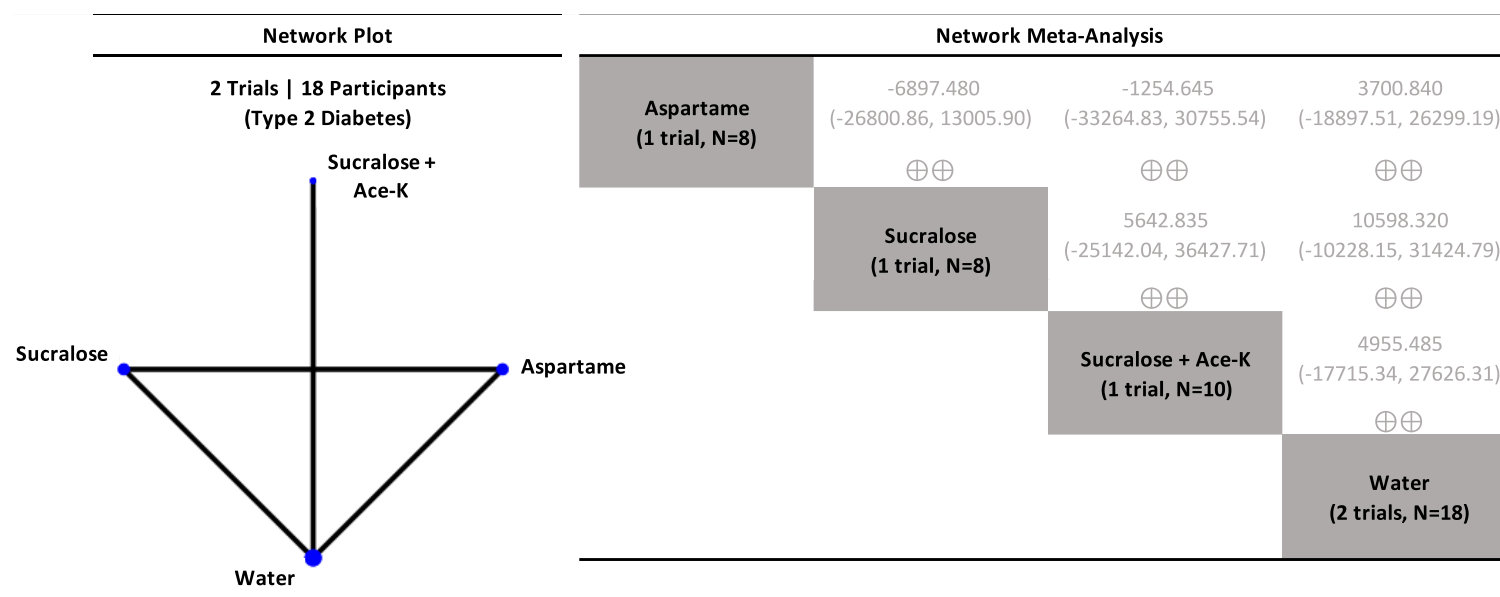

Network plot: the size of the blue nodes is proportional to the number of participants and the line width is proportional to the number of studies. Network table: treatments are grouped by treatment type (i.e., individual non-nutritive sweeteners (NNS), NNS blends, water and caloric sweeteners) and are reported in alphabetical order. Treatment estimates (pmol\*min/L) are MDs and 95% CIs of the column-defining treatment compared with the row-defining treatment. MDs less than 0 favor the column-defining treatment. MDs greater than 0 favor the row-defining treatment. Significant results are bolded in black. Non-significant results are grey and not bolded. The minimally important difference (MID) for postprandial glucose response is 2250 pmol\*min/L. Trivial (significant) effects (<1 MID) or no effects have a white background; small important effects ( $\geq 1$  MID) have a light blue background; moderate effects ( $\geq 2$  MID) have a darker blue background; large effects ( $\geq 5$  to <10 MID) have a purple background; very large effects ( $\geq 10$  MID) have a black background. Confidence in the effect estimate is shown for each treatment comparison: high confidence ⊕⊕⊕⊕; moderate confidence ⊕⊕⊕; low confidence ⊕⊕; very low confidence ⊕. See **Supplementary Table 20** and **Figure 48** for detailed assessments of the confidence in the effect estimate using the CINeMA framework.



**Figure S48.** Risk of bias assessment of DELAYED COUPLING INTERVENTIONS evaluating the effect of non-nutritive sweetened beverages (NNS beverages) sweetened single or blends of non-nutritive sweeteners (NNS), water, and sugar-sweetened beverages (SSBs) sweetened with caloric sweeteners on postprandial blood INSULIN response in participants with TYPE 2 DIABETES

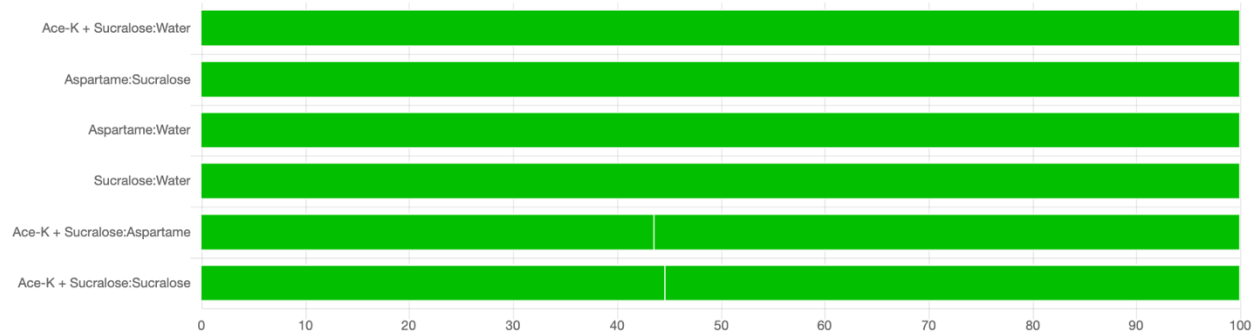

Green = no concerns; yellow = some concerns; red = major concerns



**Figure S49.** Network plot and meta-analysis of DELAYED COUPLING INTERVENTIONS evaluating the effect of non-nutritive sweetened beverages (NNS beverages) sweetened single or blends of non-nutritive sweeteners (NNS), water, and sugar-sweetened beverages (SSBs) sweetened with caloric sweeteners on postprandial blood GLP-1 response in HEALTHY participants

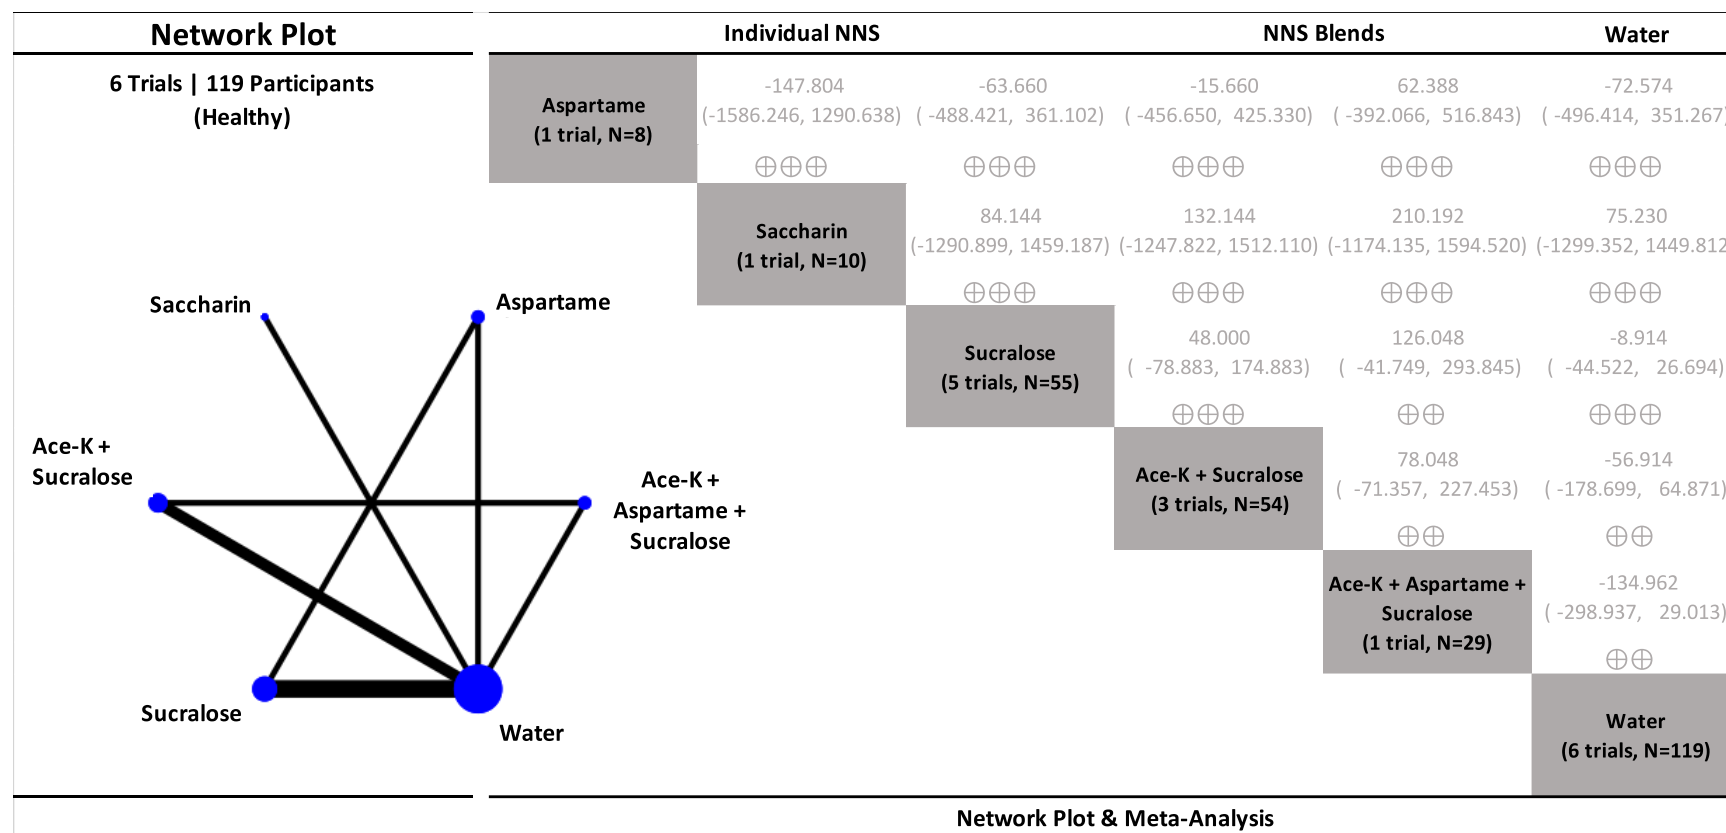

Network plot: the size of the blue nodes is proportional to the number of participants and the line width is proportional to the number of studies. Network table: treatments are grouped by treatment type (i.e., individual non-nutritive sweeteners (NNS), NNS blends, water and caloric sweeteners) and are reported in alphabetical order. Treatment estimates (pmol\*min/L) are MDs and 95% CIs of the column-defining treatment compared with the row-defining treatment. MDs less than 0 favor the column-defining treatment. MDs greater than 0 favor the row-defining treatment. Significant results are bolded in black. Non-significant results are



grey and not bolded. The minimally important difference (MID) for postprandial glucose response is 82 pmol\*min/L. Trivial (significant) effects (<1 MID) or no effects have a white background; small important effects ( $\geq 1$  MID) have a light blue background; moderate effects ( $\geq 2$  MID) have a darker blue background; large effects ( $\geq 5$  to <10 MID) have a purple background; very large effects ( $\geq 10$  MID) have a black background. Confidence in the effect estimate is shown for each treatment comparison: high confidence  $\oplus\oplus\oplus\oplus$ ; moderate confidence  $\oplus\oplus\oplus$ ; low confidence  $\oplus\oplus$ ; very low confidence  $\oplus$ . See **Supplementary Table 21 and Figures 50-53** for detailed assessments of the confidence in the effect estimate using the CINeMA framework.



**Figure S50.** Risk of bias assessment of DELAYED COUPLING INTERVENTIONS evaluating the effect of non-nutritive sweetened beverages (NNS beverages) sweetened single or blends of non-nutritive sweeteners (NNS), water, and sugar-sweetened beverages (SSBs) sweetened with caloric sweeteners on postprandial blood GLP-1 response in HEALTHY participants

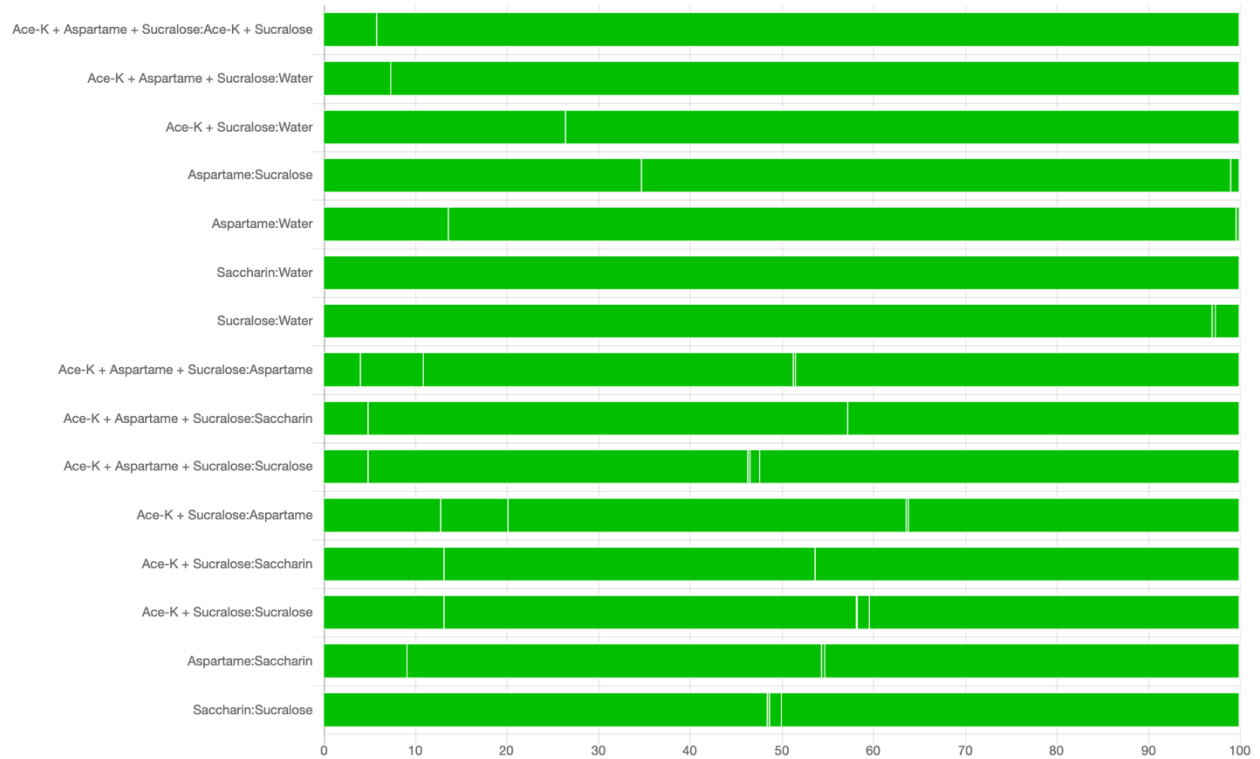

Green = no concerns; yellow = some concerns; red = major concerns



**Figure S51.** CINeMA output for the IMPRECISION domain of DELAYED COUPLING INTERVENTIONS evaluating the effect of non-nutritive sweetened beverages (NNS beverages) sweetened single or blends of non-nutritive sweeteners (NNS), water, and sugar-sweetened beverages (SSBs) sweetened with caloric sweeteners on postprandial blood GLP-1 response in HEALTHY participants

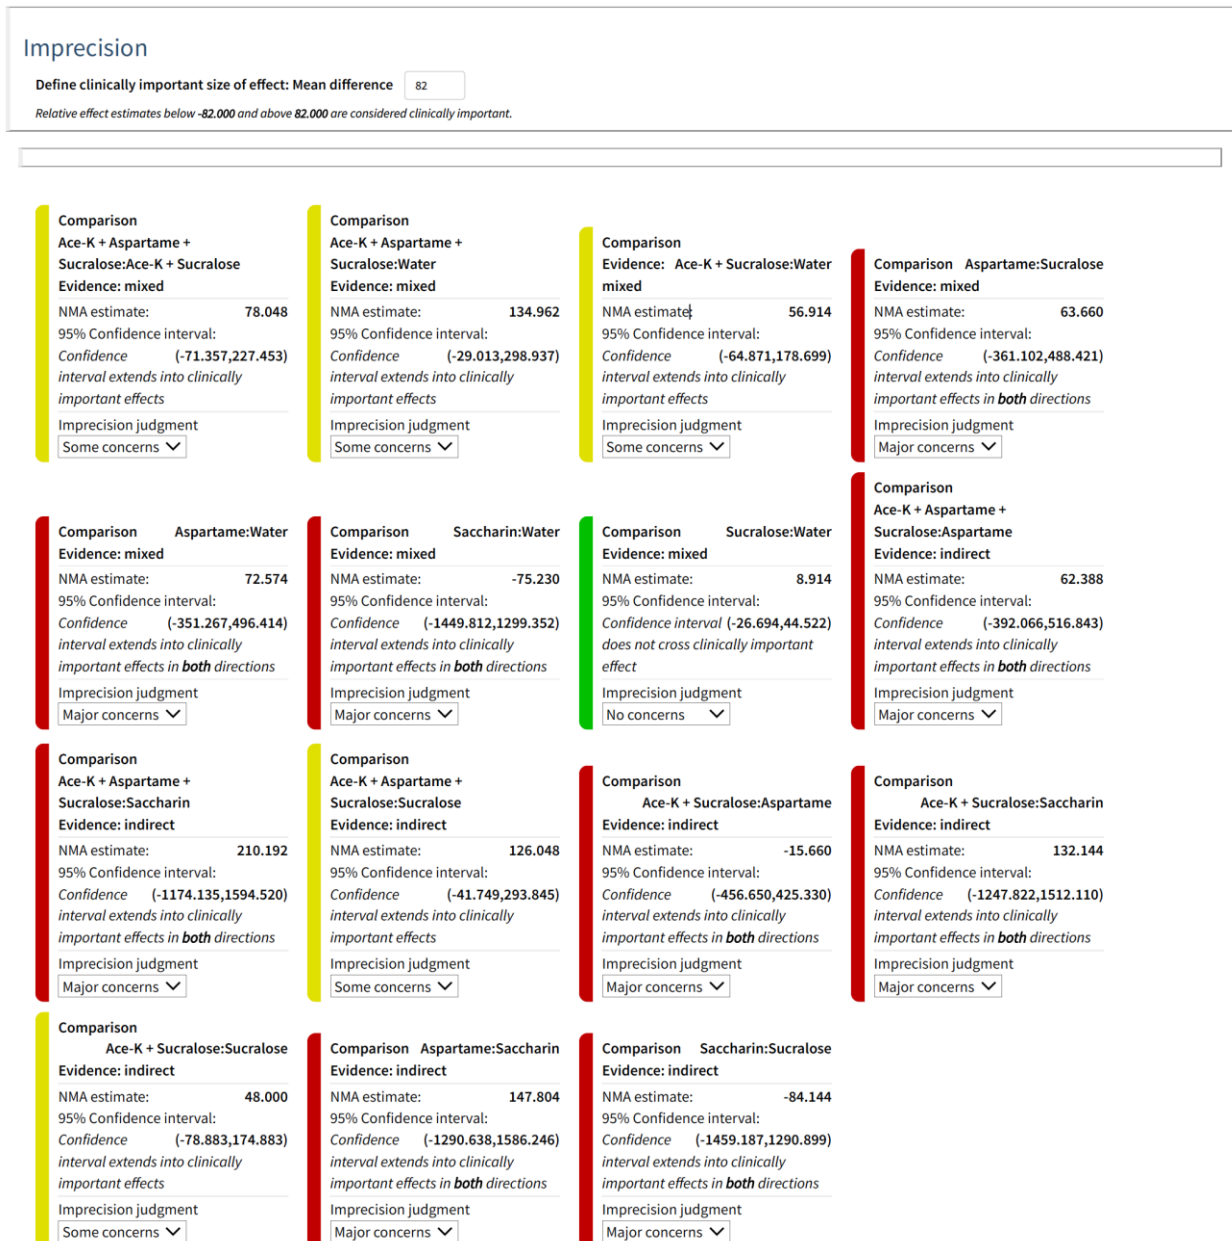

Relative effect estimates below -82.0 and above 82.0 pmol\*min/L (minimal important difference; MID) were considered clinically important. Judgements for IMPRECISION were assigned by the CINeMA algorithm (27, 28). There is no general consensus on a clinically important size difference for 2-hour blood GLP-1 incremental area under the curve (iAUC). Health Canada considers a 20% reduction in glucose iAUC to be the minimum physiologically relevant difference as per "Guideline Concerning the Safety and Physiological Effects of Novel Fibre



Sources and Food Products Containing Them” (29). Extrapolating the 20% threshold in glucose iAUC, we calculated the MID of GLP-1 iAUC by taking 20% of 412 pmol\*mins/L which is the median of the difference in GLP-1 iAUC among healthy participants (~95 pmol\*mins/L) and those with type 2 diabetes (~633 pmol\*mins/L) after a glucose or meal tolerance test (30).



**Figure S52.** CINeMA output for the HETEROGENEITY domain of DELAYED COUPLING INTERVENTIONS evaluating the effect of non-nutritive sweetened beverages (NNS beverages) sweetened single or blends of non-nutritive sweeteners (NNS), water, and sugar-sweetened beverages (SSBs) sweetened with caloric sweeteners on postprandial blood GLP-1 response in HEALTHY participants

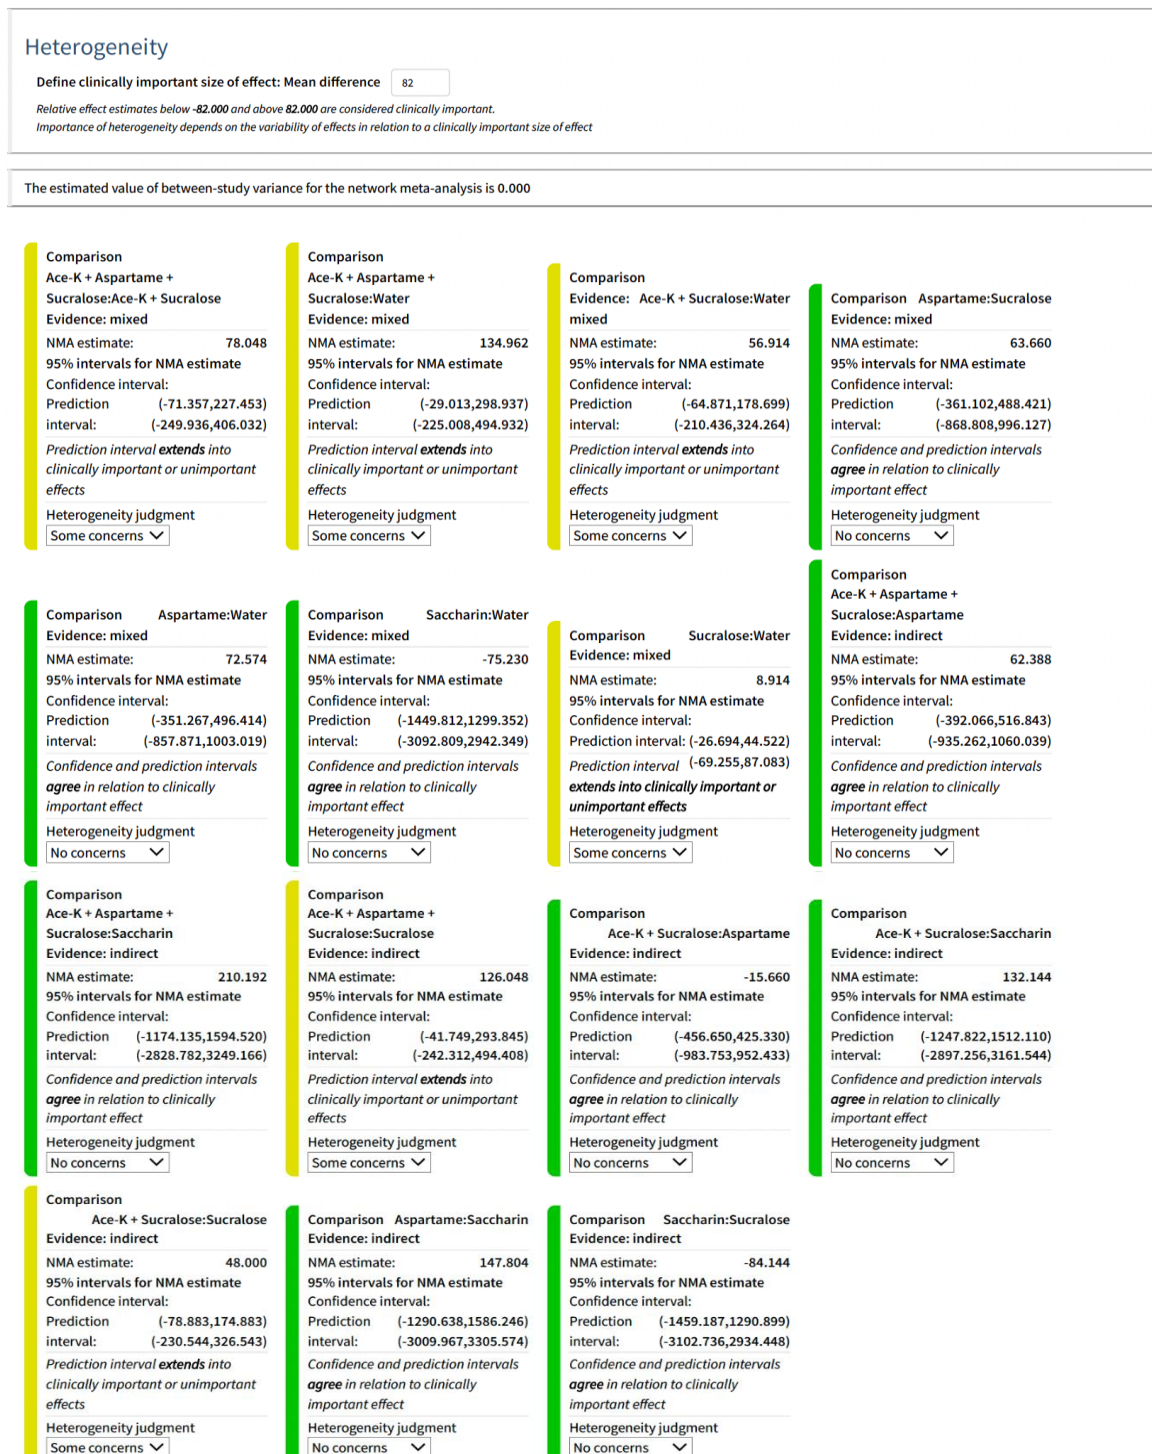



**Figure S53.** CINeMA output for the INCOHERENCE domain of DELAYED COUPLING INTERVENTIONS evaluating the effect of non-nutritive sweetened beverages (NNS beverages) sweetened single or blends of non-nutritive sweeteners (NNS), water, and sugar-sweetened beverages (SSBs) sweetened with caloric sweeteners on postprandial blood GLP-1 response in HEALTHY participants

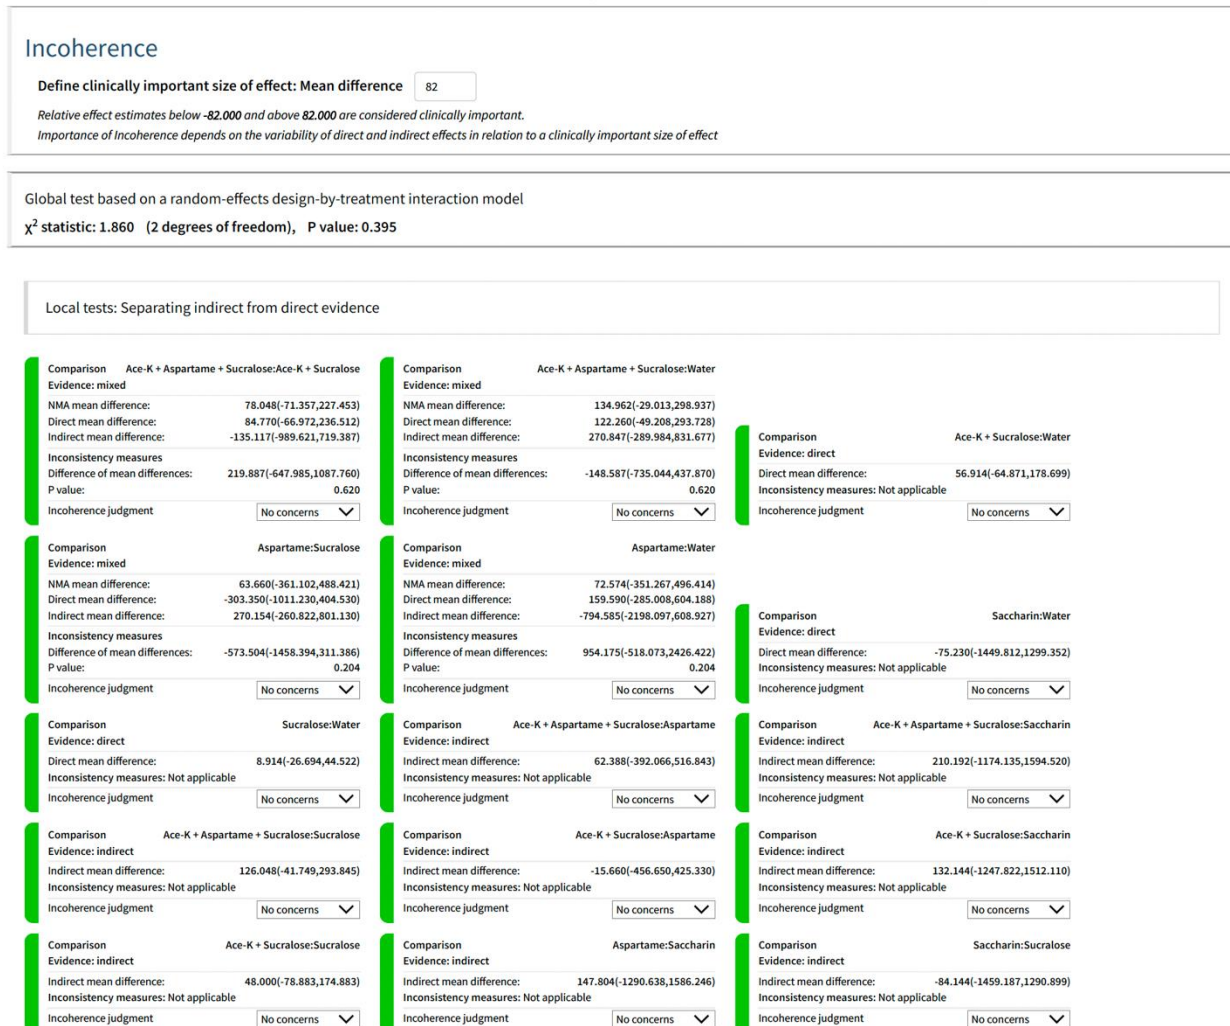



**Figure S54.** Network plot and meta-analysis of DELAYED COUPLING INTERVENTIONS evaluating the effect of non-nutritive sweetened beverages (NNS beverages) sweetened single or blends of non-nutritive sweeteners (NNS), water, and sugar-sweetened beverages (SSBs) sweetened with caloric sweeteners on postprandial blood GLP-1 response in participants with TYPE 2 DIABETES

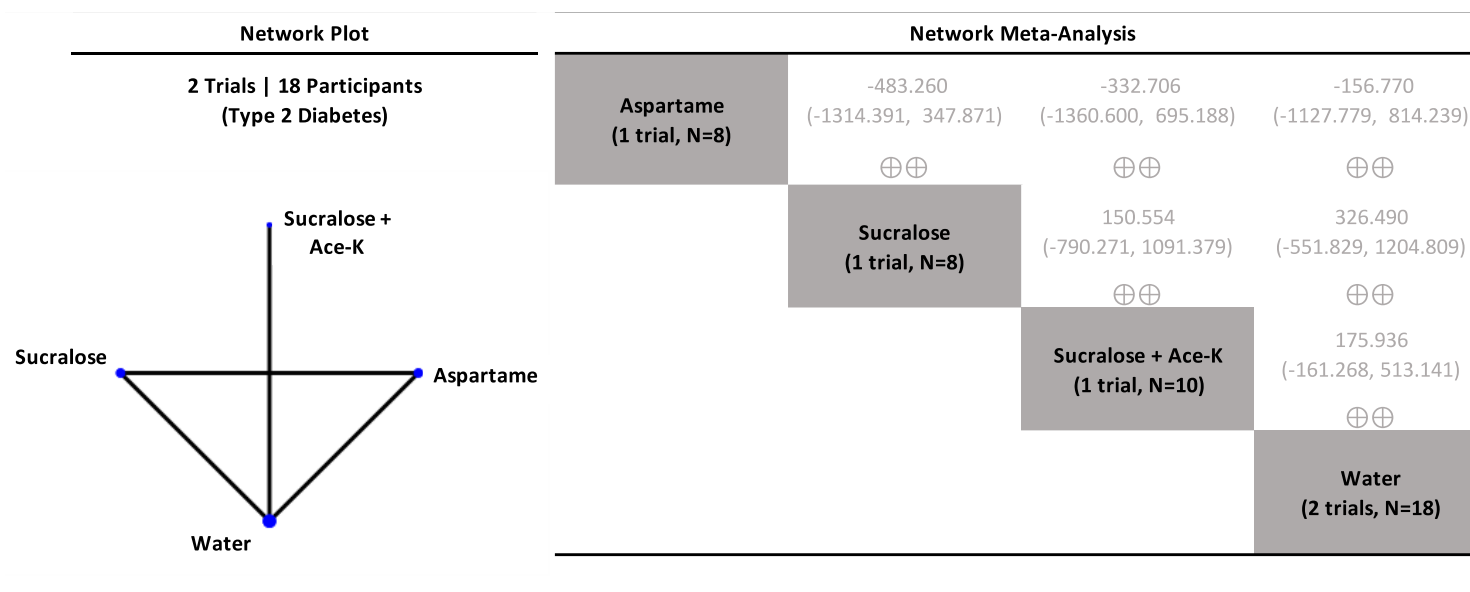

Network plot: the size of the blue nodes is proportional to the number of participants and the line width is proportional to the number of studies. Network table: treatments are grouped by treatment type (i.e., individual non-nutritive sweeteners (NNS), NNS blends, water and caloric sweeteners) and are reported in alphabetical order. Treatment estimates (pmol\*min/L) are MDs and 95% CIs of the column-defining treatment compared with the row-defining treatment. MDs less than 0 favor the column-defining treatment. MDs greater than 0 favor the row-defining treatment. Significant results are bolded in black. Non-significant results are grey and not bolded. The minimally important difference (MID) for postprandial glucose response is 82 pmol\*min/L. Trivial (significant) effects (<1 MID) or no effects have a white background; small important effects ( $\geq 1$  MID) have a light blue background; moderate effects ( $\geq 2$  MID) have a darker blue background; large effects ( $\geq 5$  to <10 MID) have a purple background; very large effects ( $\geq 10$  MID) have a black background. Confidence in the effect estimate is shown for each treatment comparison: high confidence  $\oplus\oplus\oplus\oplus$ ; moderate confidence  $\oplus\oplus\oplus$ ; low confidence  $\oplus\oplus$ ; very low confidence  $\oplus$ . See **Supplementary Table 22 and Figure 55** for detailed assessments of the confidence in the effect estimate using the CINeMA framework.



**Figure S55.** Risk of bias assessment of DELAYED COUPLING INTERVENTIONS evaluating the effect of non-nutritive sweetened beverages (NNS beverages) sweetened single or blends of non-nutritive sweeteners (NNS), water, and sugar-sweetened beverages (SSBs) sweetened with caloric sweeteners on postprandial blood GLP-1 response in participants with TYPE 2 DIABETES

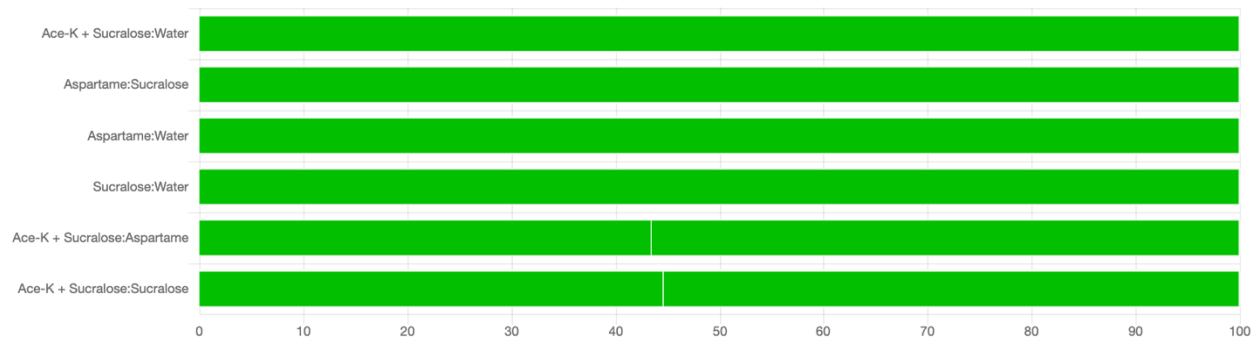

Green = no concerns; yellow = some concerns; red = major concerns



**Figure S56.** Network plot and meta-analysis of DELAYED COUPLING INTERVENTIONS evaluating the effect of non-nutritive sweetened beverages (NNS beverages) sweetened single or blends of non-nutritive sweeteners (NNS), water, and sugar-sweetened beverages (SSBs) sweetened with caloric sweeteners on postprandial blood GIP response in HEALTHY participants

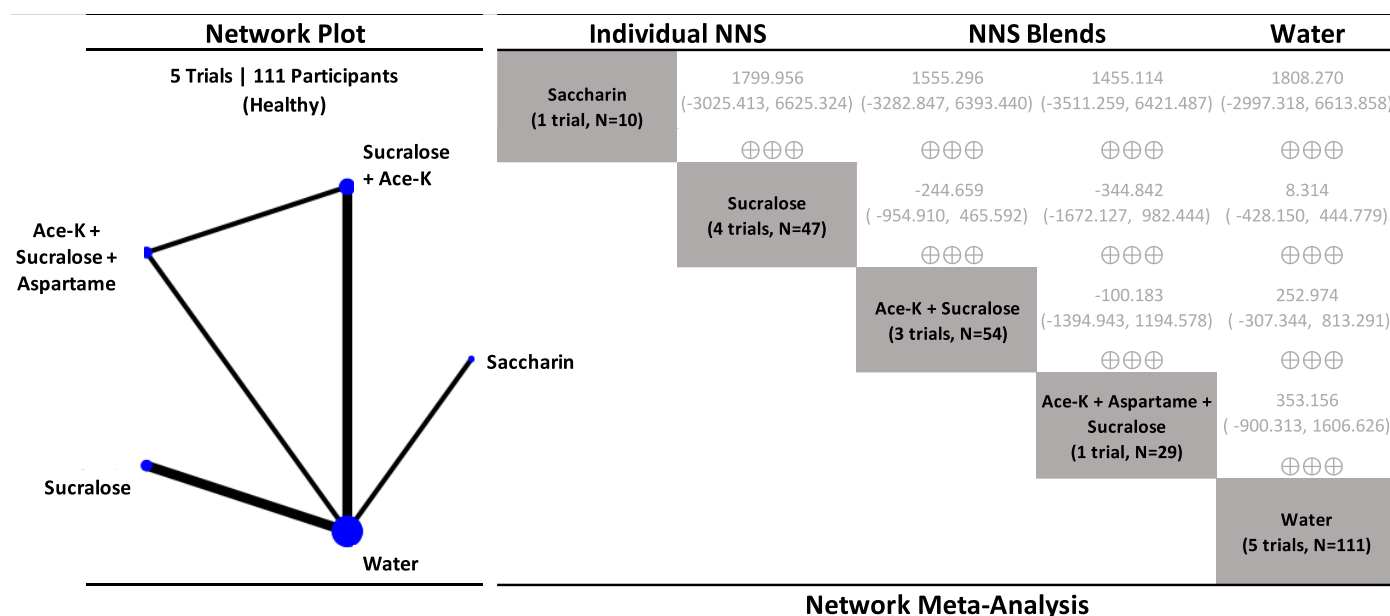

Network plot: the size of the blue nodes is proportional to the number of participants and the line width is proportional to the number of studies. Network table: treatments are grouped by treatment type (i.e., individual non-nutritive sweeteners (NNS), NNS blends, water and caloric sweeteners) and are reported in alphabetical order. Treatment estimates (pmol\*min/L) are MDs and 95% CIs of the column-defining treatment compared with the row-defining treatment. MDs less than 0 favor the column-defining treatment. MDs greater than 0 favor the row-defining treatment. Significant results are bolded in black. Non-significant results are grey and not bolded. The minimally important difference (MID) for postprandial glucose response is 94 pmol\*min/L. Trivial (significant) effects (<1 MID) or no effects have a white background; small important effects (≥1 MID) have a light blue background; moderate effects (≥2 MID) have a darker blue background; large effects (≥5 to <10 MID) have a purple background; very large effects (≥10 MID) have a black background. Confidence in the effect estimate is shown for each treatment comparison: high confidence ⊕⊕⊕⊕; moderate confidence ⊕⊕⊕; low confidence ⊕⊕; very low confidence ⊕. See **Supplementary Table 23 and Figures 57-60** for detailed assessments of the confidence in the effect estimate using the CINeMA framework.



**Figure S57.** Risk of bias assessment of DELAYED COUPLING INTERVENTIONS evaluating the effect of non-nutritive sweetened beverages (NNS beverages) sweetened single or blends of non-nutritive sweeteners (NNS), water, and sugar-sweetened beverages (SSBs) sweetened with caloric sweeteners on postprandial blood GIP response in HEALTHY participants

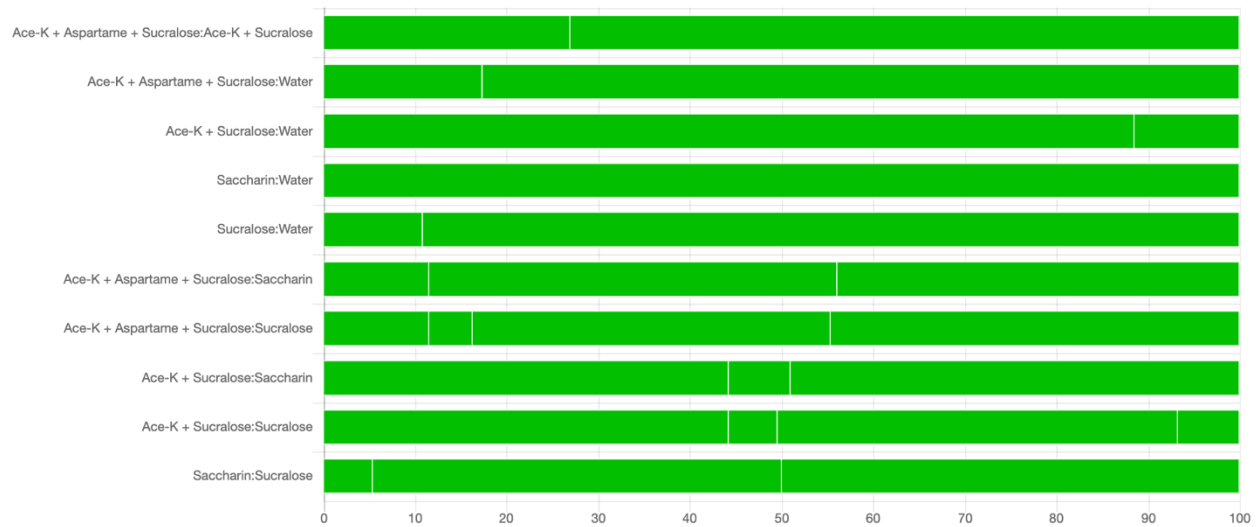

Green = no concerns; yellow = some concerns; red = major concerns



**Figure S58.** CINeMA output for the IMPRECISION domain of DELAYED COUPLING INTERVENTIONS evaluating the effect of non-nutritive sweetened beverages (NNS beverages) sweetened single or blends of non-nutritive sweeteners (NNS), water, and sugar-sweetened beverages (SSBs) sweetened with caloric sweeteners on postprandial blood GIP response in HEALTHY participants

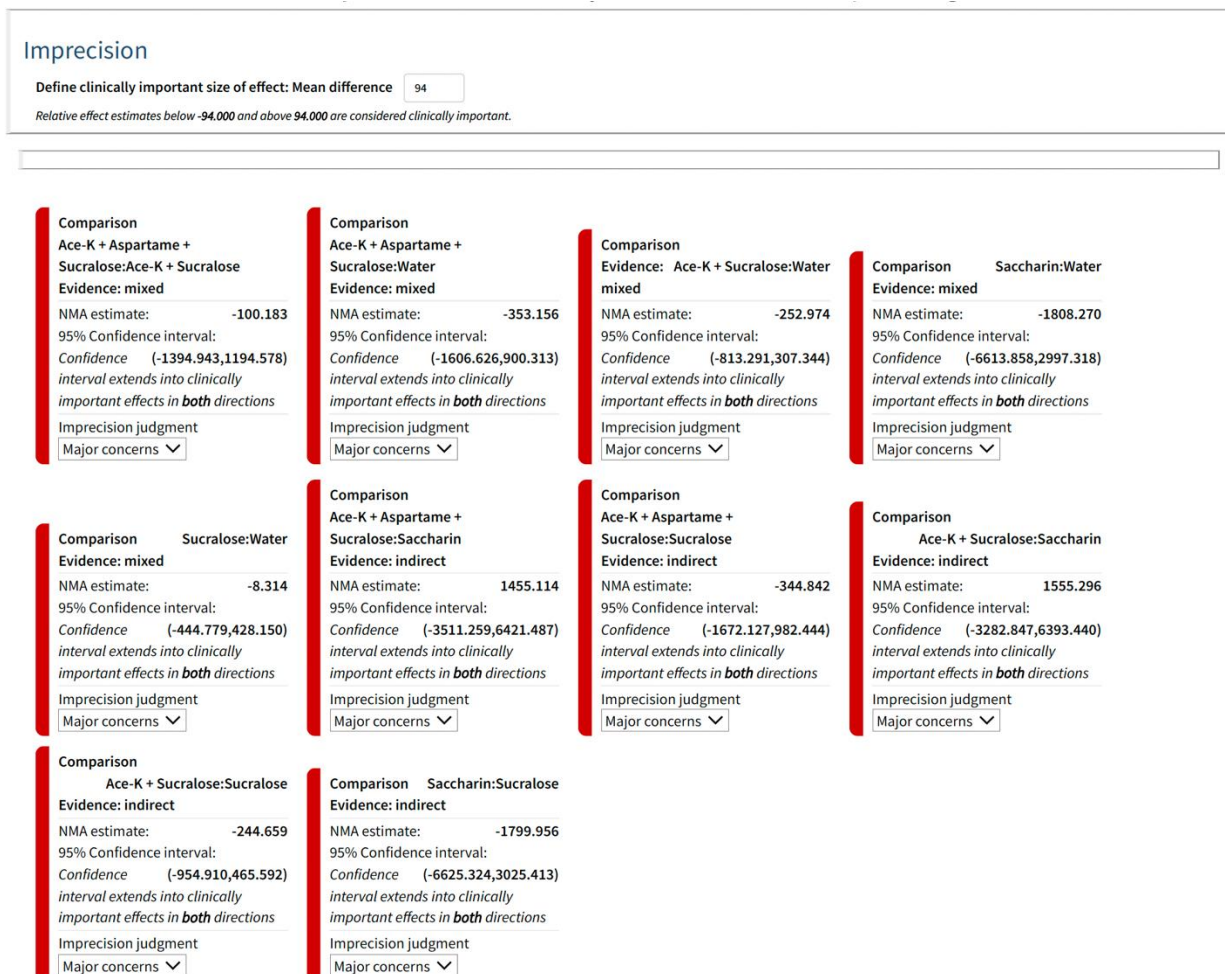

Relative effect estimates below -94.0 and above 94.0 pmol\*min/L (minimal important difference; MID) were considered clinically important. Judgements for IMPRECISION were assigned by the CiNEMA algorithm (27, 28). There is no general consensus on a clinically important size difference for 2-hour blood GIP incremental area under the curve (iAUC). Health Canada considers a 20% reduction in glucose iAUC to be the minimum physiologically relevant difference as per “Guideline Concerning the Safety and Physiological Effects of Novel Fibre Sources and Food Products Containing Them” (29). Extrapolating the 20% threshold in glucose iAUC, we calculated the MID of GIP iAUC by taking 20% of 468 pmol\*mins/L which is the median of the difference in GIP iAUC among healthy participants (~168 pmol\*mins/L) and those with type 2 diabetes (~768 pmol\*mins/L) after a glucose or meal tolerance test (31).



**Figure S59.** CINeMA output for the HETEROGENEITY domain of DELAYED COUPLING INTERVENTIONS evaluating the effect of non-nutritive sweetened beverages (NNS beverages) sweetened single or blends of non-nutritive sweeteners (NNS), water, and sugar-sweetened beverages (SSBs) sweetened with caloric sweeteners on postprandial blood GIP response in HEALTHY participants

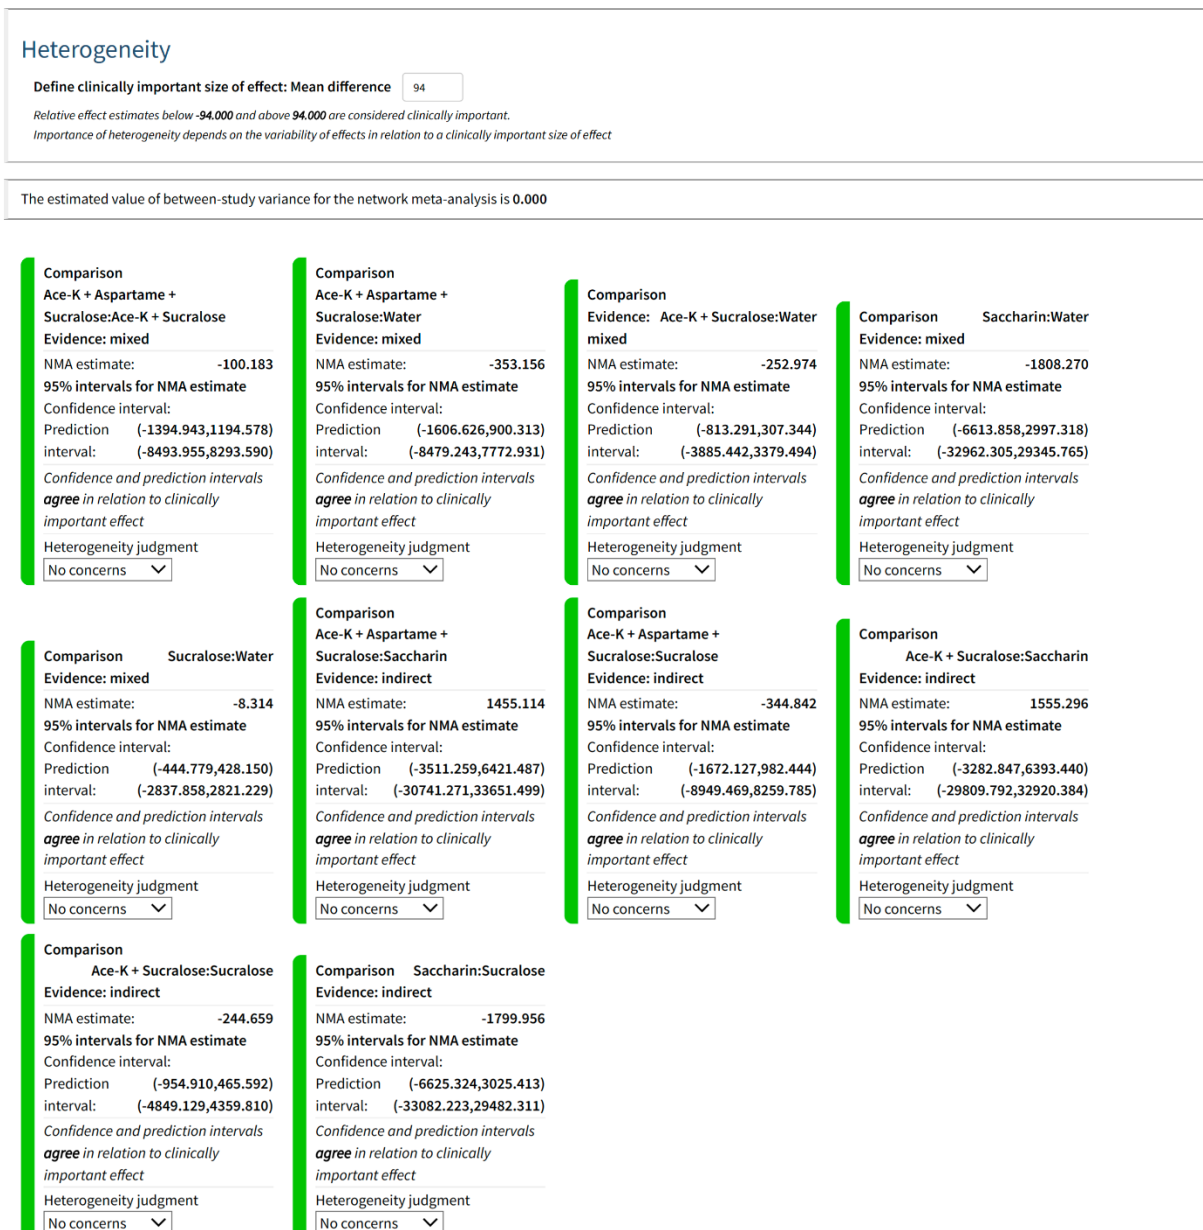



**Figure S60.** CINeMA output for the INCOHERENCE domain of DELAYED COUPLING INTERVENTIONS evaluating the effect of non-nutritive sweetened beverages (NNS beverages) sweetened single or blends of non-nutritive sweeteners (NNS), water, and sugar-sweetened beverages (SSBs) sweetened with caloric sweeteners on postprandial blood GIP response in HEALTHY participants

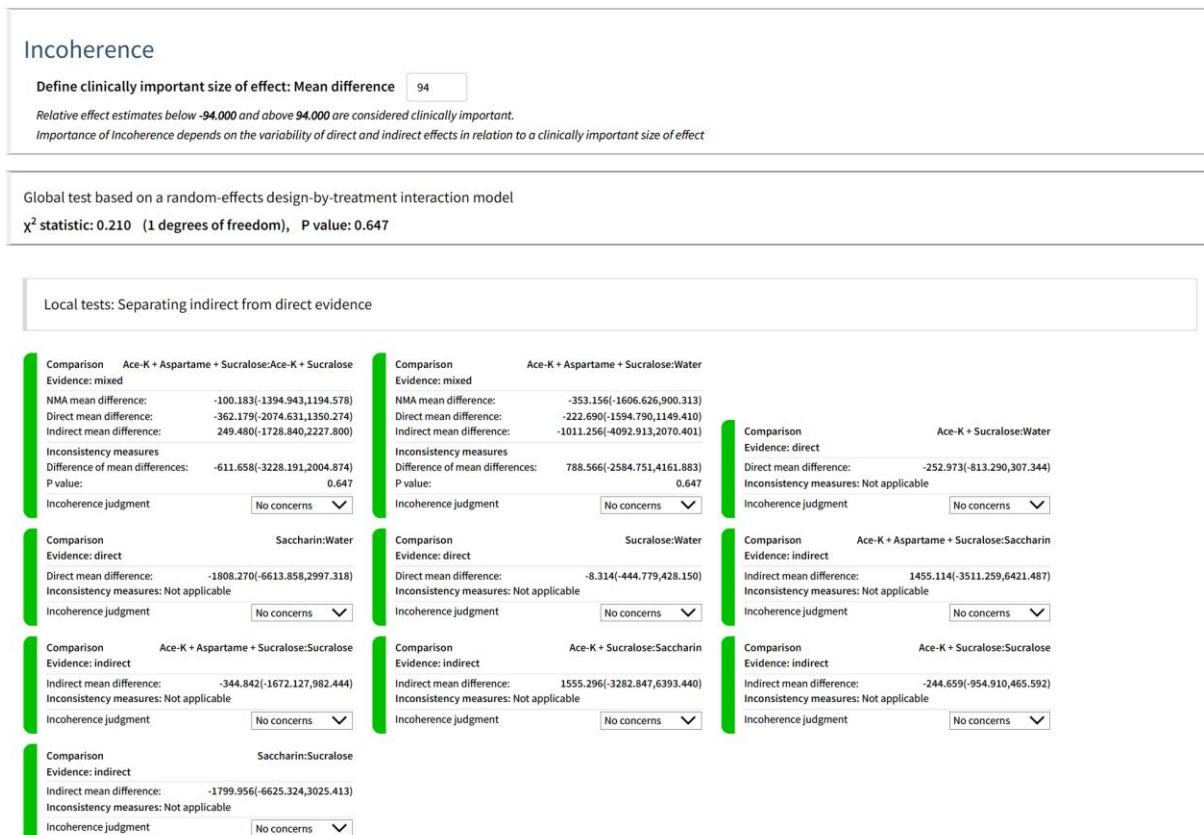



**Figure S61.** Network plot and meta-analysis of DELAYED COUPLING INTERVENTIONS evaluating the effect of non-nutritive sweetened beverages (NNS beverages) sweetened single or blends of non-nutritive sweeteners (NNS), water, and sugar-sweetened beverages (SSBs) sweetened with caloric sweeteners on postprandial blood GLUCAGON response in HEALTHY participants

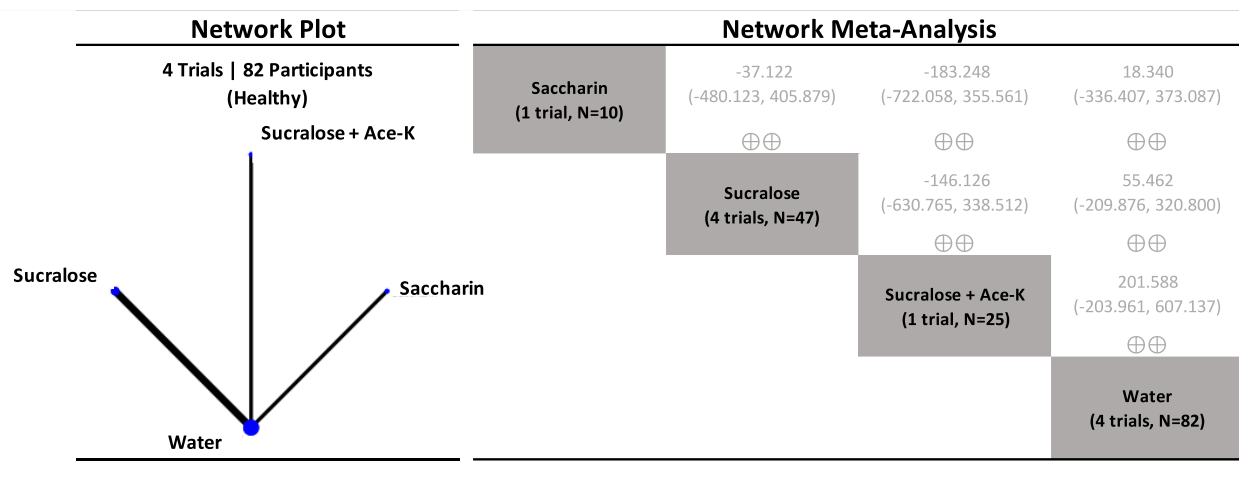

Network plot: the size of the blue nodes is proportional to the number of participants and the line width is proportional to the number of studies. Network table: treatments are grouped by treatment type (i.e., individual non-nutritive sweeteners (NNS), NNS blends, water and caloric sweeteners) and are reported in alphabetical order. Treatment estimates (pmol\*min/L) are MDs and 95% CIs of the column-defining treatment compared with the row-defining treatment. MDs less than 0 favor the column-defining treatment. MDs greater than 0 favor the row-defining treatment. Significant results are bolded in white. Non-significant results are grey and not bolded. The minimally important difference (MID) for postprandial glucose response is 205 pmol\*min/L. Trivial (significant) effects (<1 MID) or no effects have a white background; small important effects ( $\geq 1$  MID) have a light blue background; moderate effects ( $\geq 2$  MID) have a darker blue background; large effects ( $\geq 5$  to <10 MID) have a purple background; very large effects ( $\geq 10$  MID) have a black background. Confidence in the effect estimate is shown for each treatment comparison: high confidence  $\oplus\oplus\oplus\oplus$ ; moderate confidence  $\oplus\oplus\oplus$ ; low confidence  $\oplus\oplus$ ; very low confidence  $\oplus$ . See **Supplementary Table 24** and **Figure 62** for detailed assessments of the confidence in the effect estimate using the CINeMA framework.



**Figure S62.** Risk of bias assessment of DELAYED COUPLING INTERVENTIONS evaluating the effect of non-nutritive sweetened beverages (NNS beverages) sweetened single or blends of non-nutritive sweeteners (NNS), water, and sugar-sweetened beverages (SSBs) sweetened with caloric sweeteners on postprandial blood GLUCAGON response in HEALTHY participants

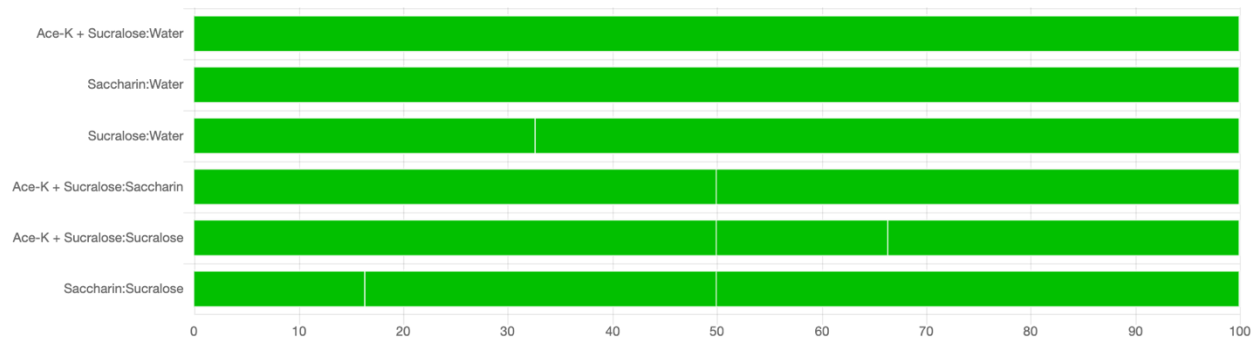

Green = no concerns; yellow = some concerns; red = major concerns



## SUPPLEMENTARY REFERENCES

1. U.S. Food and Drug Administration. Additional Information about High-Intensity Sweeteners Permitted for Use in Food in the United States; 2018. Accessed at <https://www.fda.gov/food/food-additives-petitions/additional-information-about-high-intensity-sweeteners-permitted-use-food-united-states> on October 2, 2021. .
2. Shigeta H, Yoshida T, Nakai M, Mori H, Kano Y, Nishioka H, et al. Effects of aspartame on diabetic rats and diabetic patients. *J Nutr Sci Vitaminol (Tokyo)*. 1985;31(5):533-40.
3. Okuno G, Kawakami F, Tako H, Kashihara T, Shibamoto S, Yamazaki T, et al. Glucose tolerance, blood lipid, insulin and glucagon concentration after single or continuous administration of aspartame in diabetics. *Diabetes Res Clin Pract*. 1986;2(1):23-7.
4. Horwitz DL, McLane M, Kobe P. Response to single dose of aspartame or saccharin by NIDDM patients. *Diabetes Care*. 1988;11(3):230-4.
5. Møller SE. Effect of aspartame and protein, administered in phenylalanine-equivalent doses, on plasma neutral amino acids, aspartate, insulin and glucose in man. *Pharmacol Toxicol*. 1991;68(5):408-12.
6. Härtel B, Graubau H, Schneider B. The Influence of Sweetener Solutions on the Secretion of Insulin and the Blood Glucose Level. *Ernährungsumschau*. 1993;40(4):152-55.
7. Nguyen UN, Dumoulin G, Henriët MT, Regnard J. Aspartame ingestion increases urinary calcium, but not oxalate excretion, in healthy subjects. *J Clin Endocrinol Metab*. 1998;83(1):165-8.
8. Coppola L, Coppola A, Grassia A, Mastrolorenzo L, Lettieri B, De Lucia D, et al. Acute hyperglycemia alters von Willebrand factor but not the fibrinolytic system in elderly subjects with normal or impaired glucose tolerance. *Blood Coagul Fibrinolysis*. 2004;15(8):629-35.
9. Berlin I, Vorspan F, Warot D, Manéglia B, Spreux-Varoquaux O. Effect of glucose on tobacco craving. Is it mediated by tryptophan and serotonin? *Psychopharmacology (Berl)*. 2005;178(1):27-34.
10. Ford HE, Peters V, Martin NM, Sleeth ML, Ghatei MA, Frost GS, et al. Effects of oral ingestion of sucralose on gut hormone response and appetite in healthy normal-weight subjects. *Eur J Clin Nutr*. 2011;65(4):508-13.
11. Maersk M, Belza A, Holst JJ, Fenger-Grøn M, Pedersen SB, Astrup A, et al. Satiety scores and satiety hormone response after sucrose-sweetened soft drink compared with isocaloric semi-skimmed milk and with non-caloric soft drink: a controlled trial. *Eur J Clin Nutr*. 2012;66(4):523-9.
12. Hazali N, Mohamed A, Ibrahim M, Masri M, Anuar K, Norazmir MN, et al. Effect of Acute Stevia Consumption on Blood Glucose Response in Healthy Malay Young Adults. *Sains Malaysiana*. 2014;43:649-54.
13. Bloomer R, Peel S, Moran R, MacDonnchadh J. Blood glucose and insulin response to artificially- and sugar-sweetened sodas in healthy men. *Integrative Food, Nutrition and Metabolism*. 2016;3.
14. González-Domínguez R, Mateos RM, Lechuga-Sancho AM, González-Cortés JJ, Corrales-Cuevas M, Rojas-Cots JA, et al. Synergic effects of sugar and caffeine on insulin-mediated



metabolomic alterations after an acute consumption of soft drinks. *Electrophoresis*. 2017;38(18):2313-22.

15. Goza R, Bunout D, Barrera G, de la Maza M, Hirsch S. Effect of Acute Consumption of Artificially Sweetened Beverages on Blood Glucose and Insulin in Healthy Subjects. *Journal of Nutrition & Food Sciences*. 2018;08.
16. Eckstein MLB, A. Haupt, S. Schierbauer, J. R. Zimmer, R. T. Wachsmuth, N. Zunner, B. Zimmermann, P. Obermayer-Pietsch, B. Moser, O. Acute Metabolic Responses to Glucose and Fructose Supplementation in Healthy Individuals: A Double-Blind Randomized Crossover Placebo-Controlled Trial. *Nutrients*. 2021;13(11):16.
17. Wolf-Novak LC, Stegink LD, Brummel MC, Persoon TJ, Filer LJ, Jr., Bell EF, et al. Aspartame ingestion with and without carbohydrate in phenylketonuric and normal subjects: effect on plasma concentrations of amino acids, glucose, and insulin. *Metabolism*. 1990;39(4):391-6.
18. Melchior JC, Rigaud D, Colas-Linhart N, Petiet A, Girard A, Apfelbaum M. Immunoreactive beta-endorphin increases after an aspartame chocolate drink in healthy human subjects. *Physiol Behav*. 1991;50(5):941-4.
19. Solomi L, Rees GA, Redfern KM. The acute effects of the non-nutritive sweeteners aspartame and acesulfame-K in UK diet cola on glycaemic response. *Int J Food Sci Nutr*. 2019;70(7):894-900.
20. Brown RJ, Walter M, Rother KI. Effects of diet soda on gut hormones in youths with diabetes. *Diabetes Care*. 2012;35(5):959-64.
21. Pepino MY, Tiemann CD, Patterson BW, Wice BM, Klein S. Sucralose affects glycemic and hormonal responses to an oral glucose load. *Diabetes Care*. 2013;36(9):2530-5.
22. Temizkan S, Deyneli O, Yasar M, Arpa M, Gunes M, Yazici D, et al. Sucralose enhances GLP-1 release and lowers blood glucose in the presence of carbohydrate in healthy subjects but not in patients with type 2 diabetes. *Eur J Clin Nutr*. 2015;69(2):162-6.
23. Sylvestsky AC, Brown RJ, Blau JE, Walter M, Rother KI. Hormonal responses to non-nutritive sweeteners in water and diet soda. *Nutrition & Metabolism*. 2016;13(1):71.
24. Karimian Azari E, Smith KR, Yi F, Osborne TF, Bizzotto R, Mari A, et al. Inhibition of sweet chemosensory receptors alters insulin responses during glucose ingestion in healthy adults: a randomized crossover interventional study. *Am J Clin Nutr*. 2017;105(4):1001-9.
25. Nichol AD, Salame C, Rother KI, Pepino MY. Effects of Sucralose Ingestion versus Sucralose Taste on Metabolic Responses to an Oral Glucose Tolerance Test in Participants with Normal Weight and Obesity: A Randomized Crossover Trial. *Nutrients*. 2019;12(1).
26. Solomi, L. (2020) 'Diet cola and glycaemia: The acute effects of a preload containing the non-nutritive sweeteners aspartame and acesulfame-K on the glycaemic response to a glucose load', *The Plymouth Student Scientist*, 13(1), p. 97-111.
27. Nikolakopoulou A, Higgins JPT, Papakonstantinou T, Chaimani A, Del Giovane C, Egger M, et al. CINeMA: An approach for assessing confidence in the results of a network meta-analysis. *PLOS Medicine*. 2020;17(4):e1003082.
28. Papakonstantinou T, Nikolakopoulou A, Higgins JPT, Egger M, Salanti G. CINeMA: Software for semiautomated assessment of the confidence in the results of network meta-analysis. *Campbell Systematic Reviews*. 2020;16(1):e1080.



29. Bureau of Nutritional Sciences, Food Directorate, Health Products and Food Branch. Summary of Health Canada's Assessment of a Health Claim about a Polysaccharide Complex (Glucomannan, Xanthan Gum, Sodium Alginate) and a Reduction of Post-Prandial Blood Glucose Response. 2016. Accessed at [https://www.canada.ca/content/dam/hc-sc/migration/hc-sc/fn-an/alt\\_formats/pdf/label-etiquet/claims-reclam/assess-evalu/glucose-complex-polysaccharides-complexe-glycemique-eng.pdf](https://www.canada.ca/content/dam/hc-sc/migration/hc-sc/fn-an/alt_formats/pdf/label-etiquet/claims-reclam/assess-evalu/glucose-complex-polysaccharides-complexe-glycemique-eng.pdf) on June 20, 2021.
30. Calanna S, Christensen M, Holst JJ, Laferrère B, Gluud LL, Vilsbøll T, et al. Secretion of glucagon-like peptide-1 in patients with type 2 diabetes mellitus: systematic review and meta-analyses of clinical studies. *Diabetologia*. 2013;56(5):965-72.
31. Calanna S, Christensen M, Holst JJ, Laferrère B, Gluud LL, Vilsbøll T, et al. Secretion of glucose-dependent insulintropic polypeptide in patients with type 2 diabetes: systematic review and meta-analysis of clinical studies. *Diabetes Care*. 2013;36(10):3346-52.
32. Sievenpiper JL, Jenkins DJ, Josse RG, Vuksan V. Dilution of the 75-g oral glucose tolerance test increases postprandial glycemia: implications for diagnostic criteria. *Cmaj*. 2000;162(7):993-6.
33. Braunstein CR, Noronha JC, Glenn AJ, Viguiliouk E, Noseworthy R, Khan TA, et al. A Double-Blind, Randomized Controlled, Acute Feeding Equivalence Trial of Small, Catalytic Doses of Fructose and Allulose on Postprandial Blood Glucose Metabolism in Healthy Participants: The Fructose and Allulose Catalytic Effects (FACE) Trial. *Nutrients*. 2018;10(6).
34. Noronha JC, Braunstein CR, Glenn AJ, Khan TA, Viguiliouk E, Noseworthy R, et al. The effect of small doses of fructose and allulose on postprandial glucose metabolism in type 2 diabetes: A double-blind, randomized, controlled, acute feeding, equivalence trial. *Diabetes Obes Metab*. 2018;20(10):2361-70.
35. Schünemann H, Brożek J, Guyatt G, Oxman A, editors. GRADE handbook for grading quality of evidence and strength of recommendations. Updated October 2013. The GRADE Working Group, 2013. [www.guidelinedevelopment.org/handbook](http://www.guidelinedevelopment.org/handbook).
36. Wolever TM, Jenkins DJ, Jenkins AL, Josse RG. The glycemic index: methodology and clinical implications. *Am J Clin Nutr*. 1991;54(5):846-54.
37. Chapter 2.5.5. Propagation of error considerations. NIST/SEMATECH e-Handbook of Statistical Methods. 2003. Accessed at <https://www.itl.nist.gov/div898/handbook/mpc/section5/mpc55.htm#exact> May on 13 Sep 2021. [
